# Supplementary material for: Syntheses of pterocarpenes and coumestans via regioselective cyclodehydration
Source: Royal Society of Chemistry journal article supplement (doi:10.1039/c6ob01451h), 2016-01-01

## Supporting Information

### Syntheses of Pterocarpenes and Coumestans via Regioselective Cyclodehydration

Maloy Nayak, Youngeun Jung, and Ikyon Kim\*

College of Pharmacy and Yonsei Institute of Pharmaceutical Sciences, Yonsei University  
85 Songdogwahak-ro, Yeonsu-gu, Incheon, 21983, Republic of Korea

\* Corresponding author. Tel.: +82 32 749 4515; fax: +82 32 749 4105; e-mail:  
[ikyonkim@yonsei.ac.kr](mailto:ikyonkim@yonsei.ac.kr)

#### Table of Contents

|                                                                     |             |
|---------------------------------------------------------------------|-------------|
| Copies of $^1\text{H}$ and $^{13}\text{C}$ NMR spectra of <b>4</b>  | <b>S3</b>   |
| Copies of $^1\text{H}$ and $^{13}\text{C}$ NMR spectra of <b>6</b>  | <b>S4-5</b> |
| Copies of $^1\text{H}$ and $^{13}\text{C}$ NMR spectra of <b>7</b>  | <b>S6-7</b> |
| Copies of $^1\text{H}$ and $^{13}\text{C}$ NMR spectra of <b>8</b>  | <b>S8</b>   |
| Copies of $^1\text{H}$ and $^{13}\text{C}$ NMR spectra of <b>9</b>  | <b>S9</b>   |
| Copies of $^1\text{H}$ and $^{13}\text{C}$ NMR spectra of <b>10</b> | <b>S10</b>  |
| Copies of $^1\text{H}$ and $^{13}\text{C}$ NMR spectra of <b>11</b> | <b>S11</b>  |
| Copies of $^1\text{H}$ and $^{13}\text{C}$ NMR spectra of <b>12</b> | <b>S12</b>  |
| Copies of $^1\text{H}$ and $^{13}\text{C}$ NMR spectra of <b>13</b> | <b>S13</b>  |

|                                                                                                   |               |
|---------------------------------------------------------------------------------------------------|---------------|
| Copies of $^1\text{H}$ and $^{13}\text{C}$ NMR spectra of oxiranes for the synthesis of <b>14</b> | <b>S14-17</b> |
| Copies of $^1\text{H}$ and $^{13}\text{C}$ NMR spectra of alcohols for the synthesis of <b>14</b> | <b>S18-26</b> |
| Copies of $^1\text{H}$ and $^{13}\text{C}$ NMR spectra of <b>14</b>                               | <b>S27-35</b> |
| Copies of $^1\text{H}$ and $^{13}\text{C}$ NMR spectra of <b>15</b>                               | <b>S36-44</b> |
| Copies of $^1\text{H}$ and $^{13}\text{C}$ NMR spectra of <b>16</b>                               | <b>S45-53</b> |
| Copies of $^1\text{H}$ and $^{13}\text{C}$ NMR spectra of <b>17</b>                               | <b>S54</b>    |
| Copies of $^1\text{H}$ and $^{13}\text{C}$ NMR spectra of <b>flemichapparin C</b>                 | <b>S55</b>    |

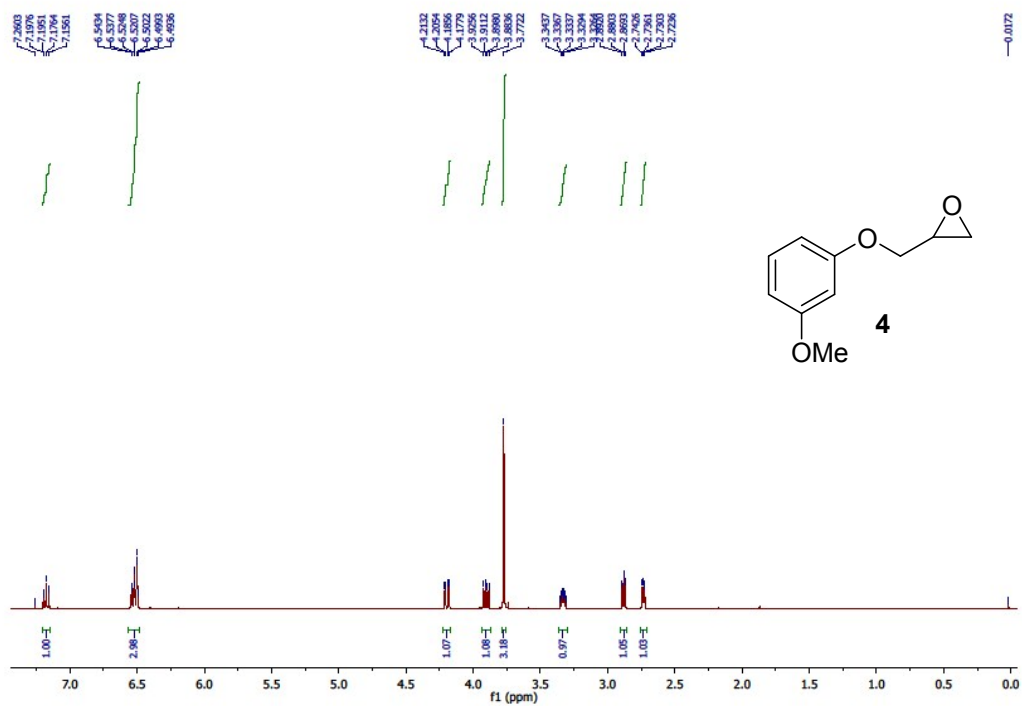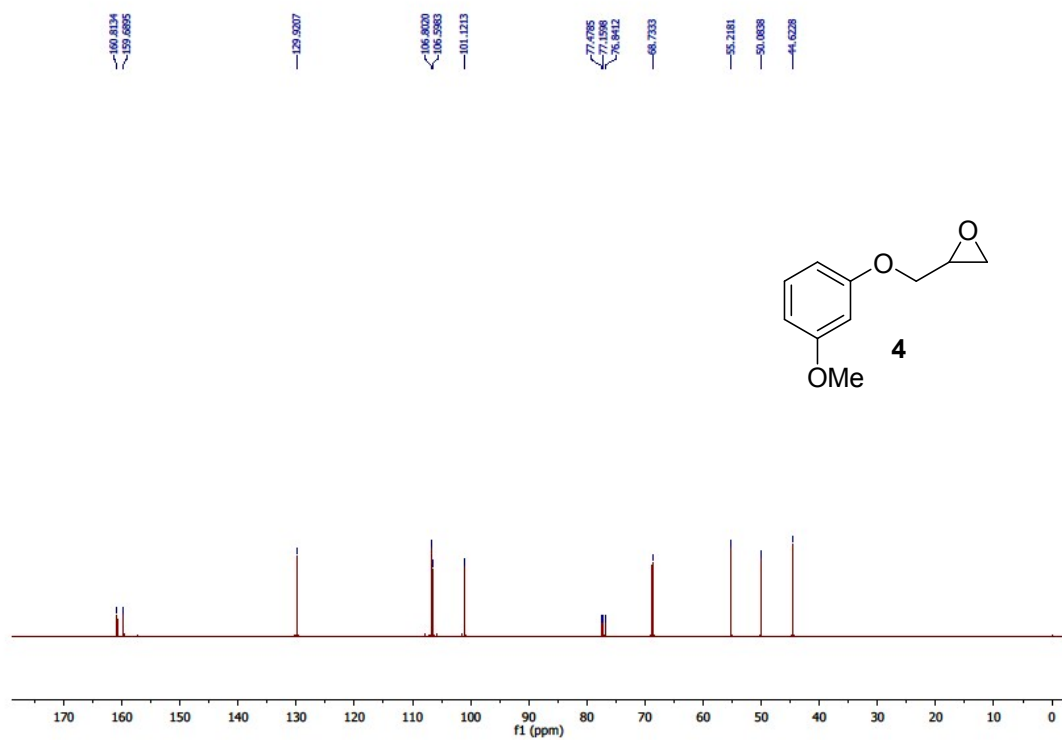

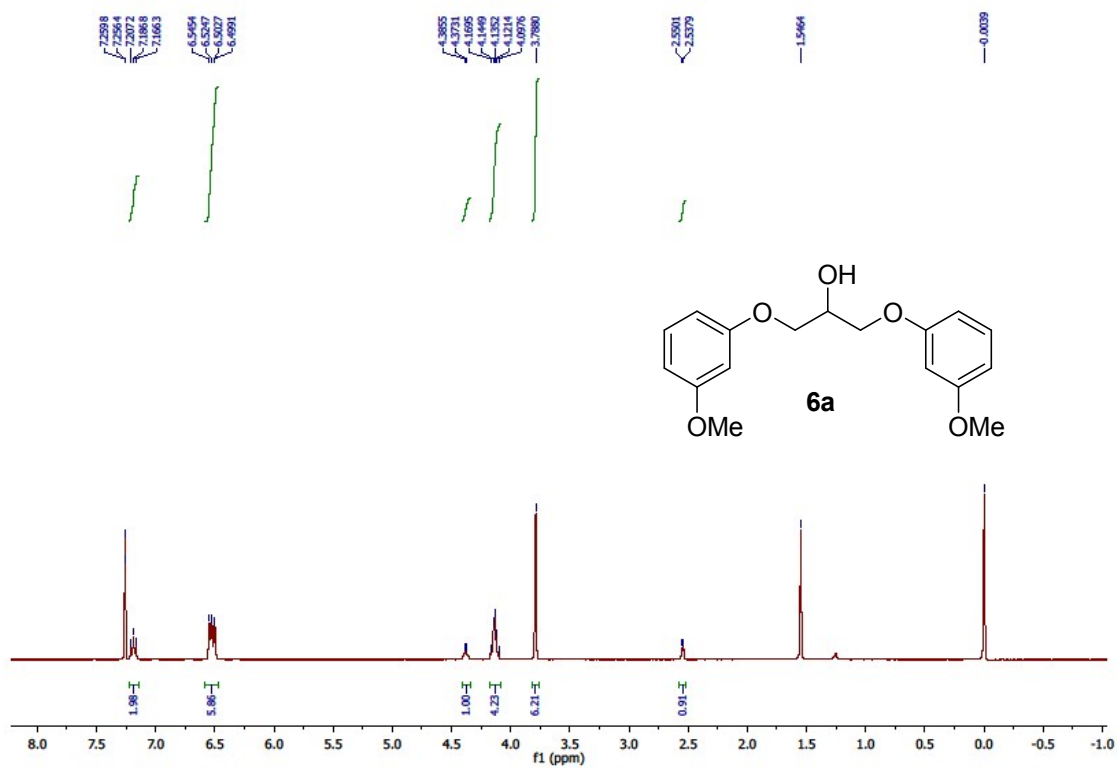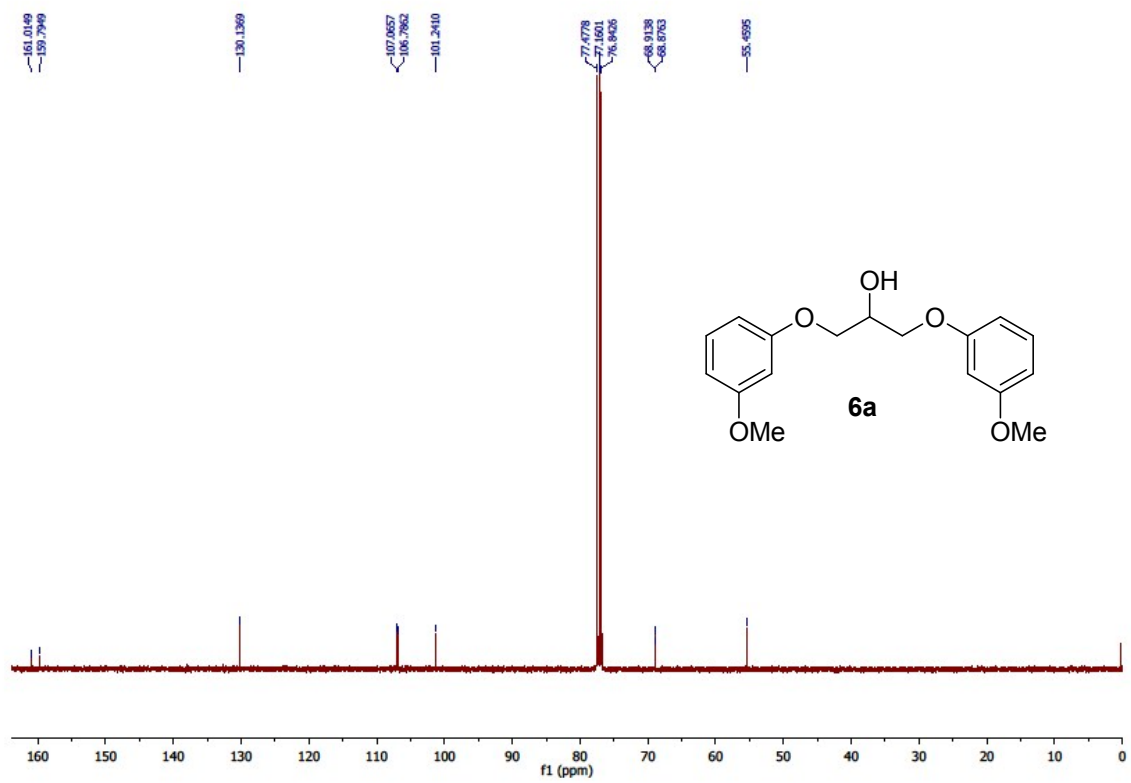

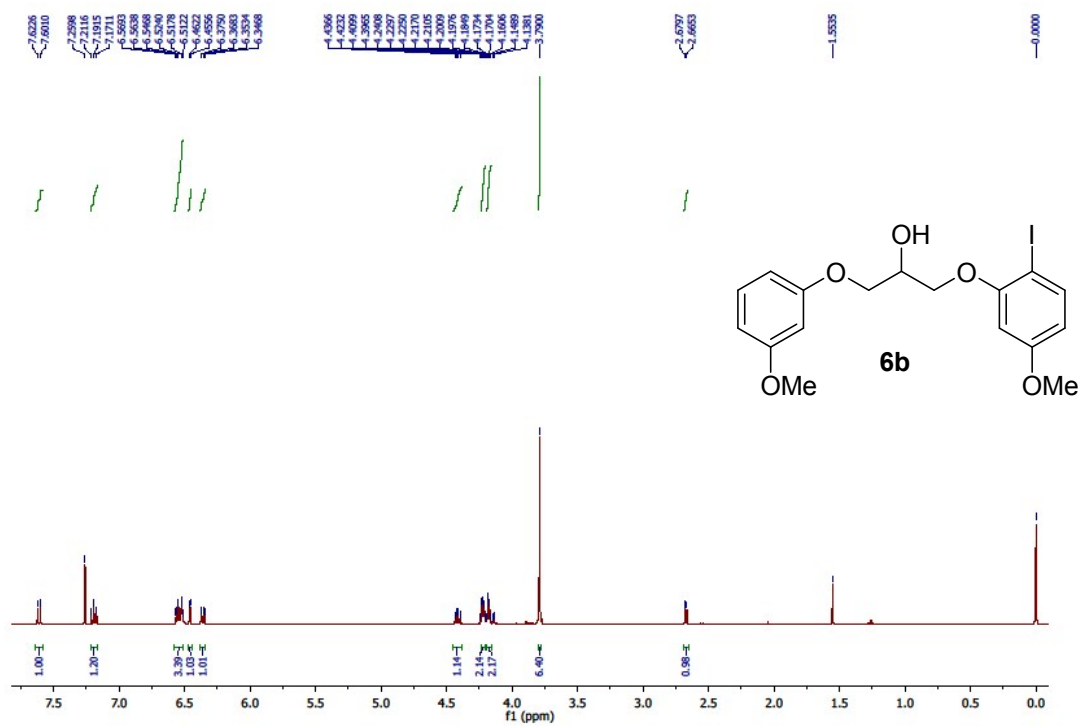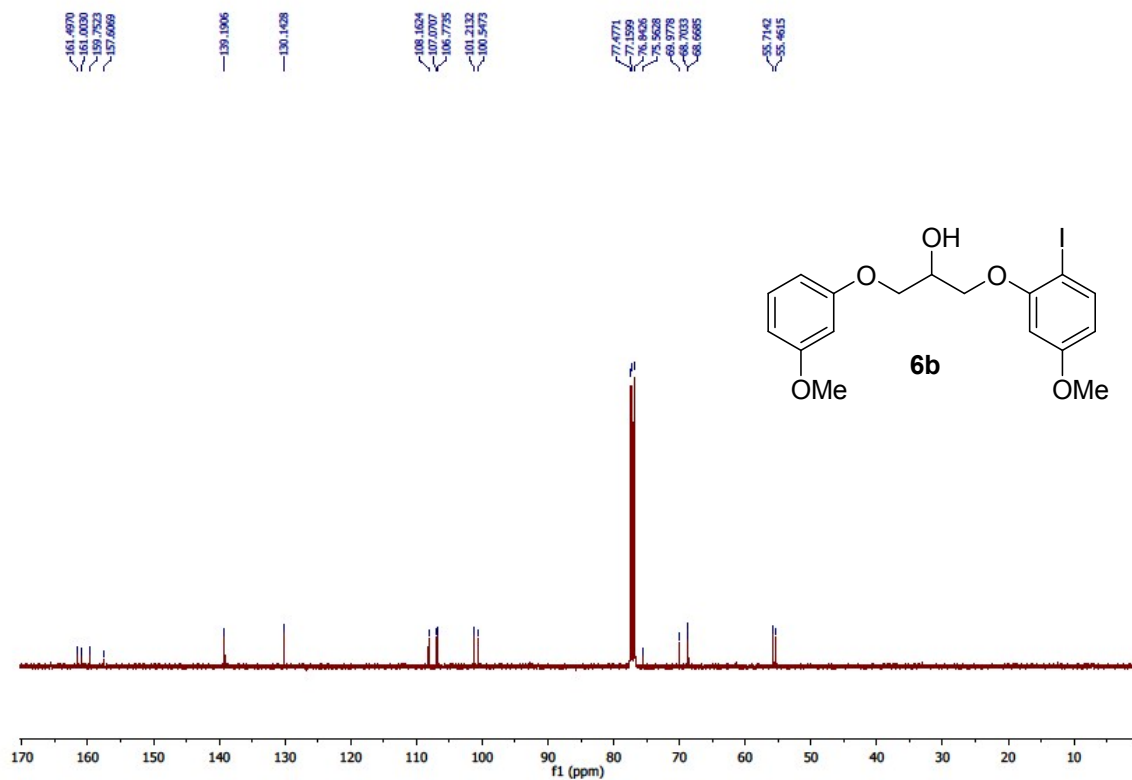

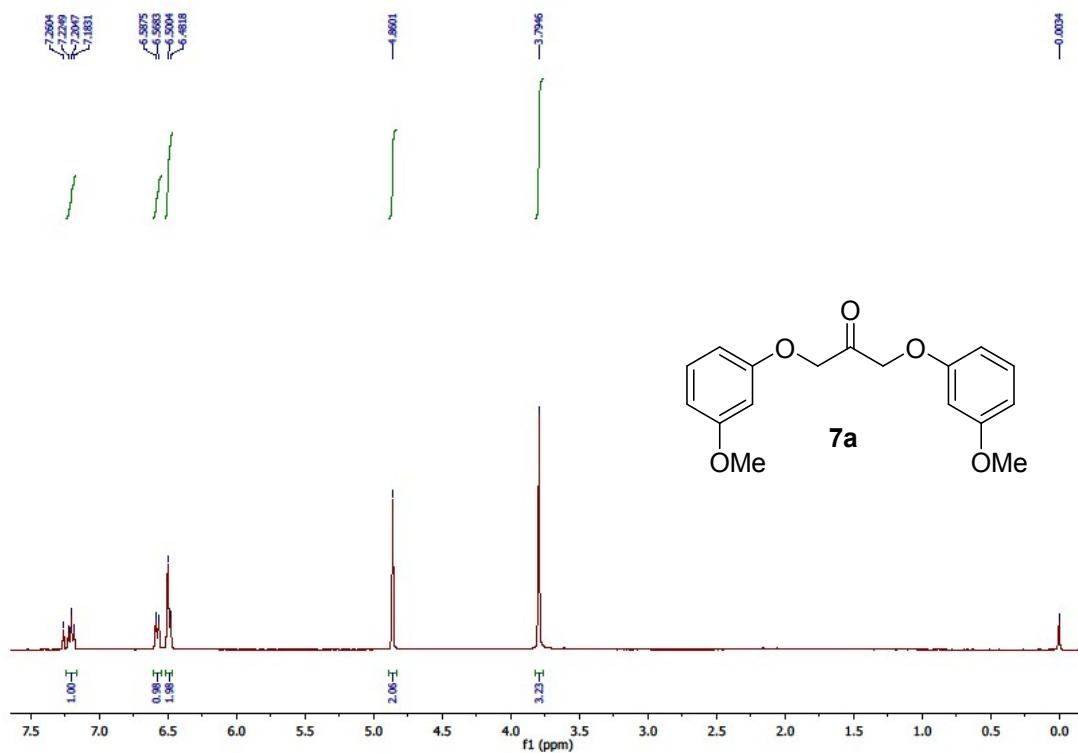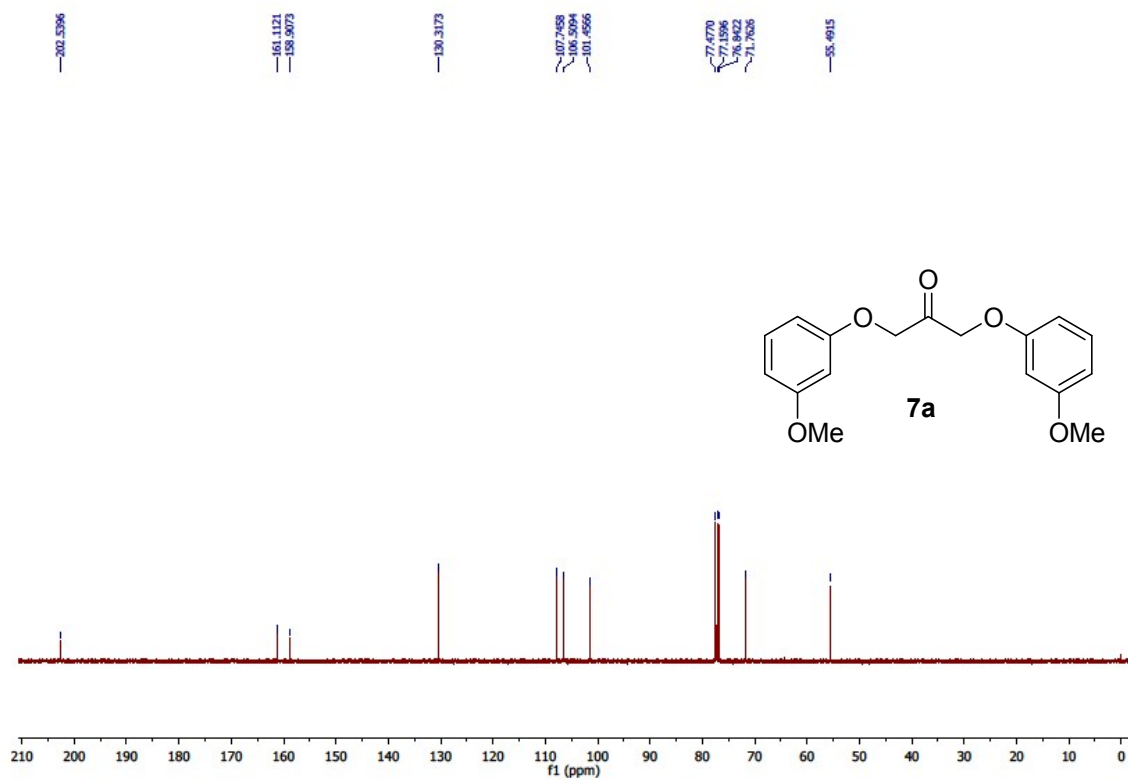

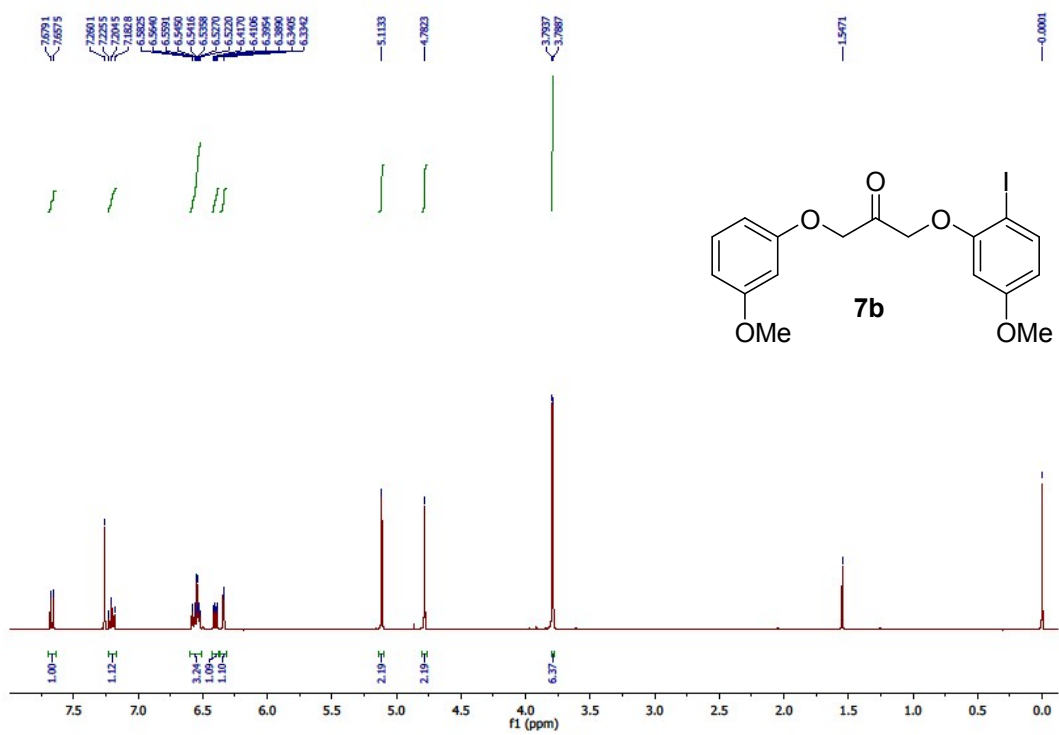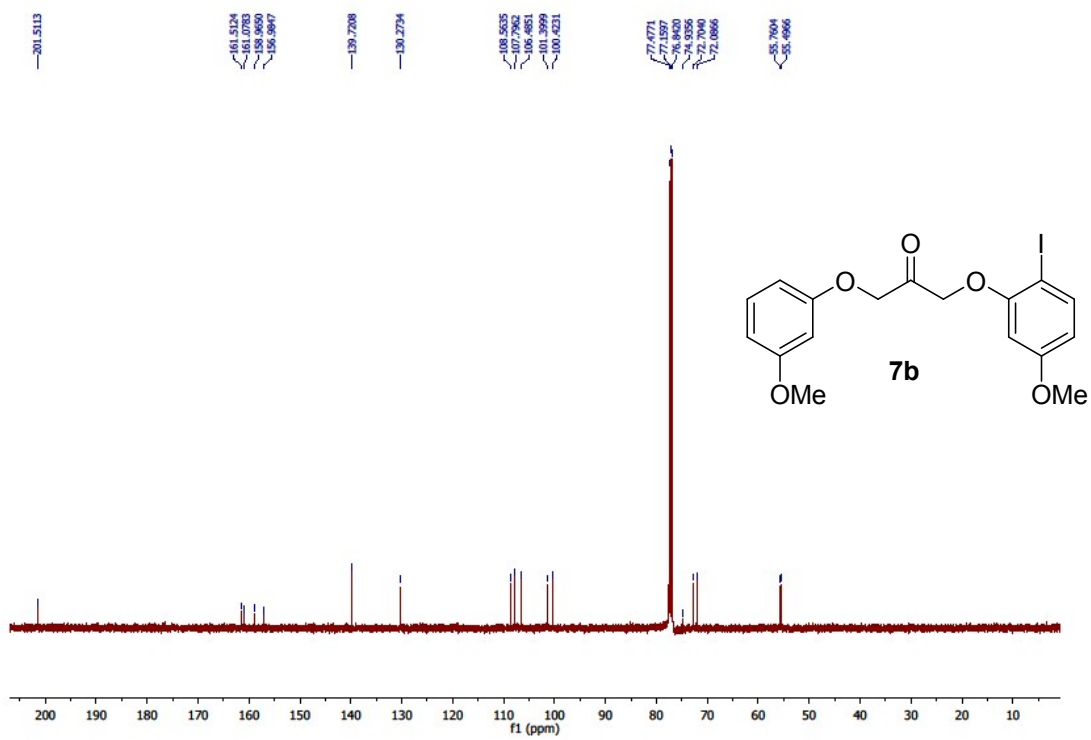

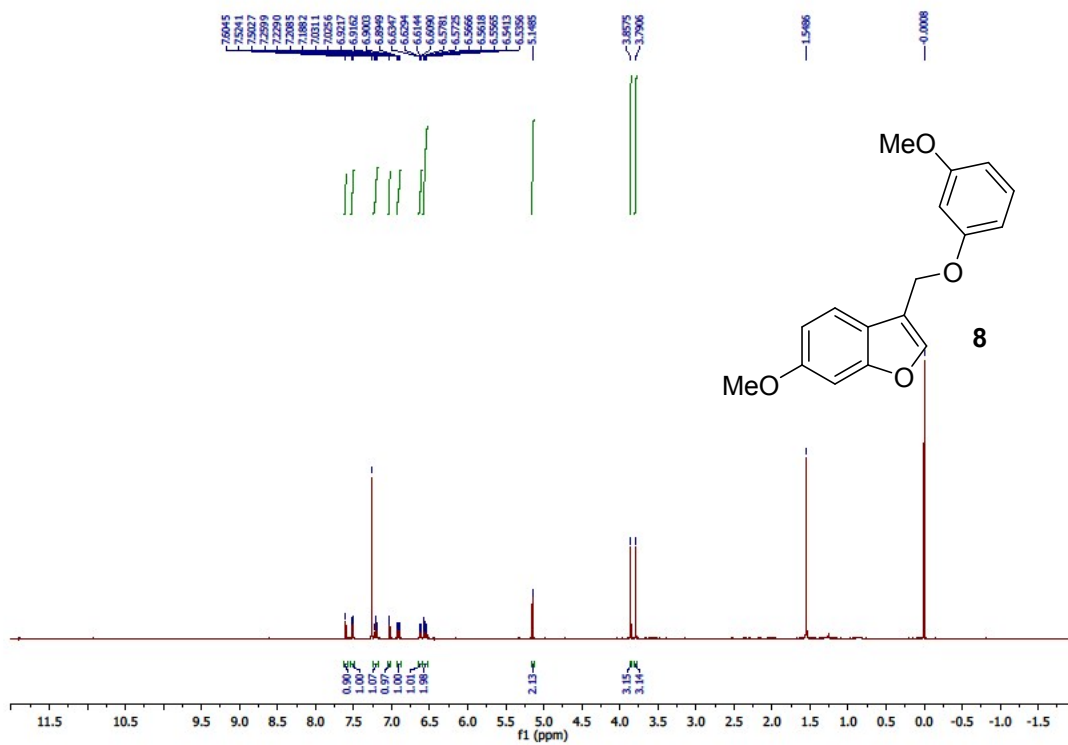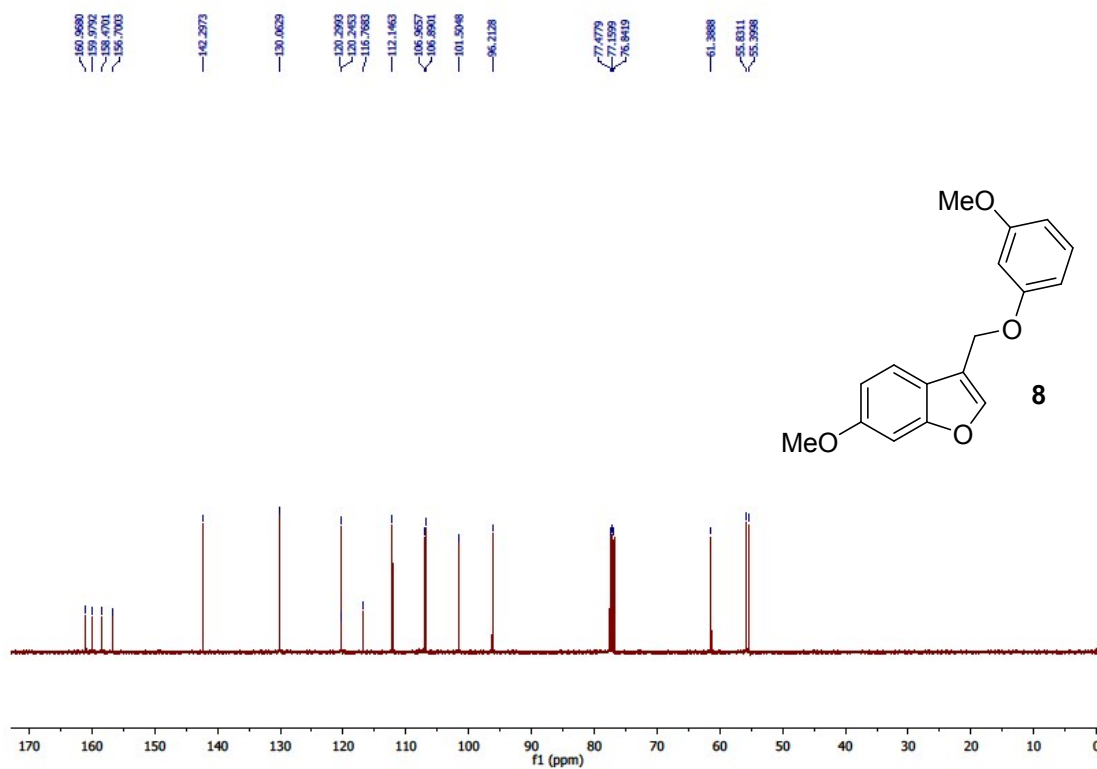



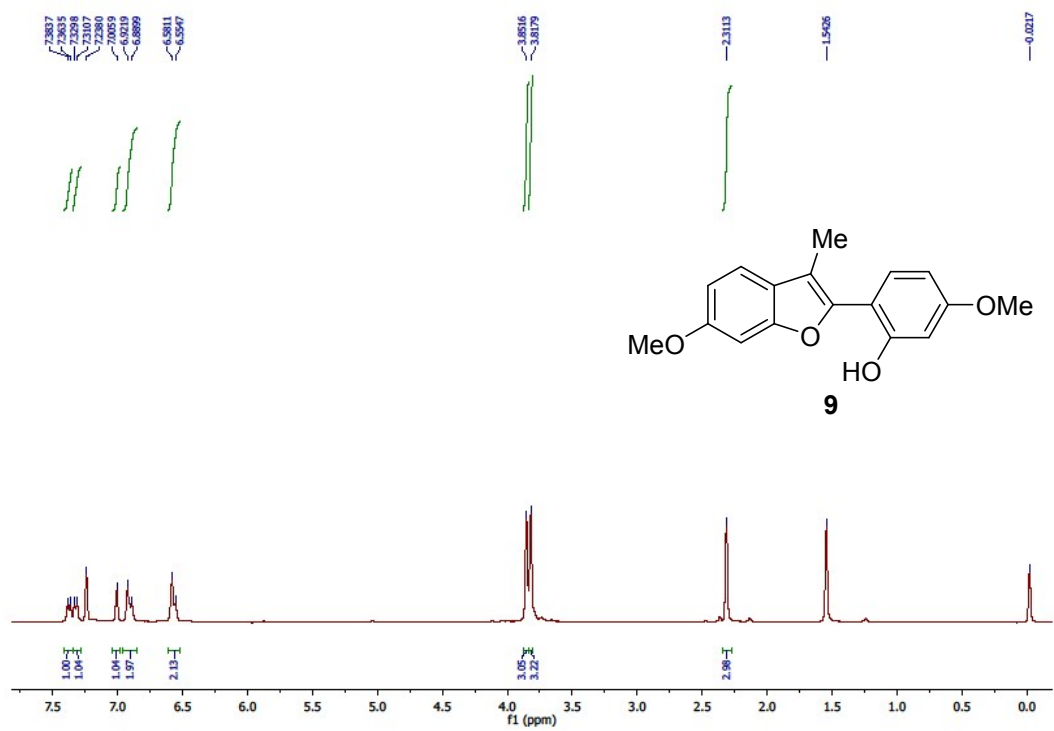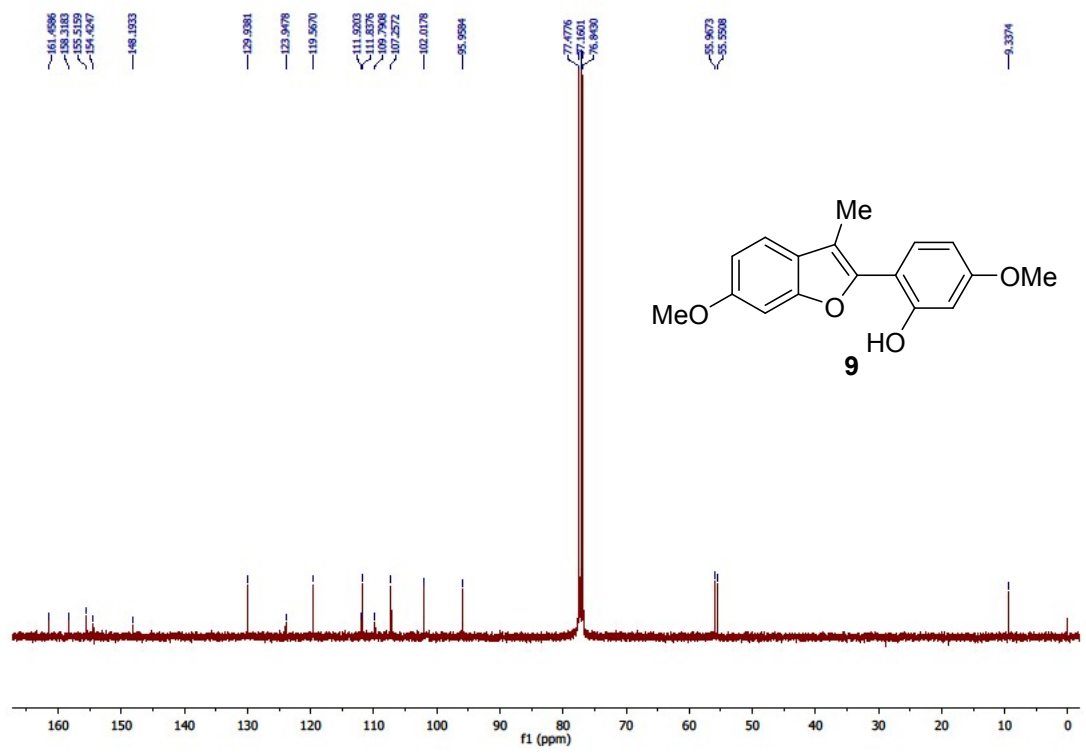

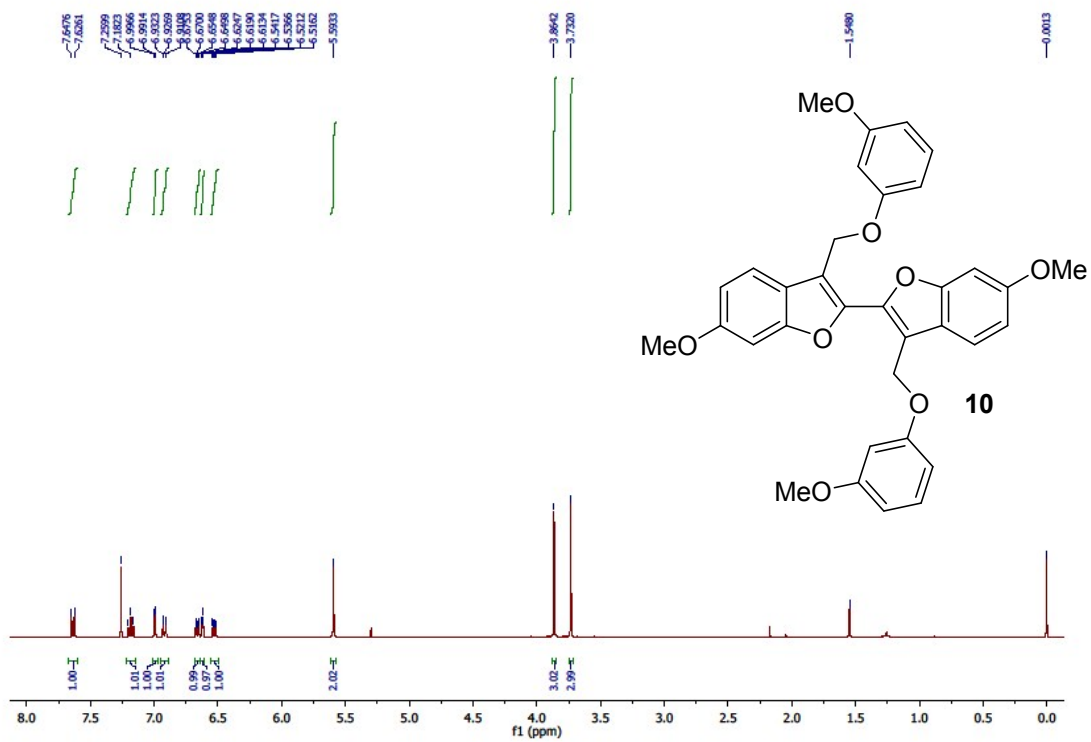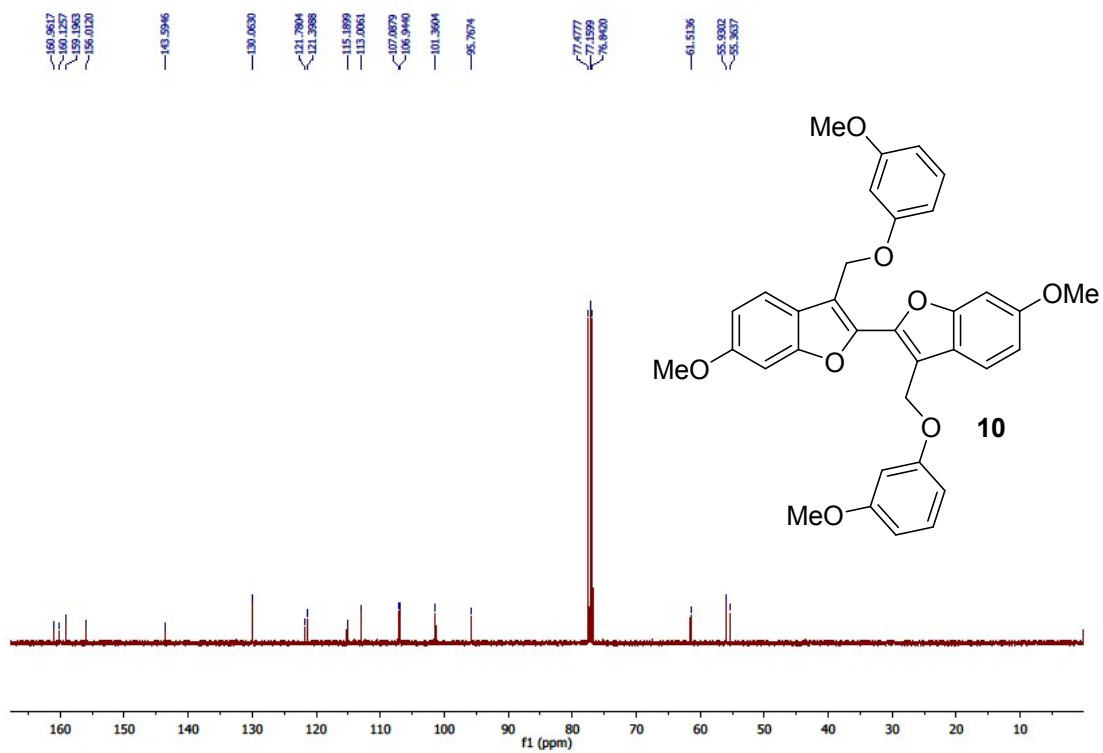

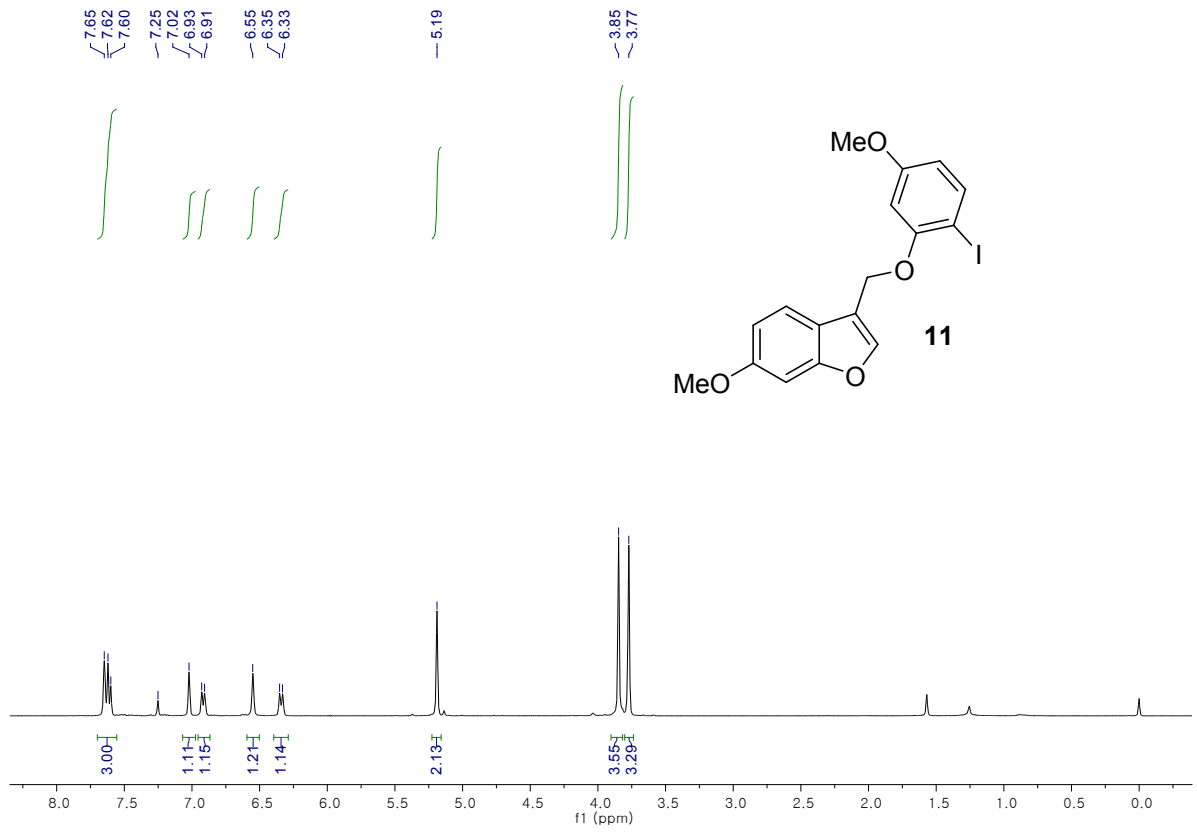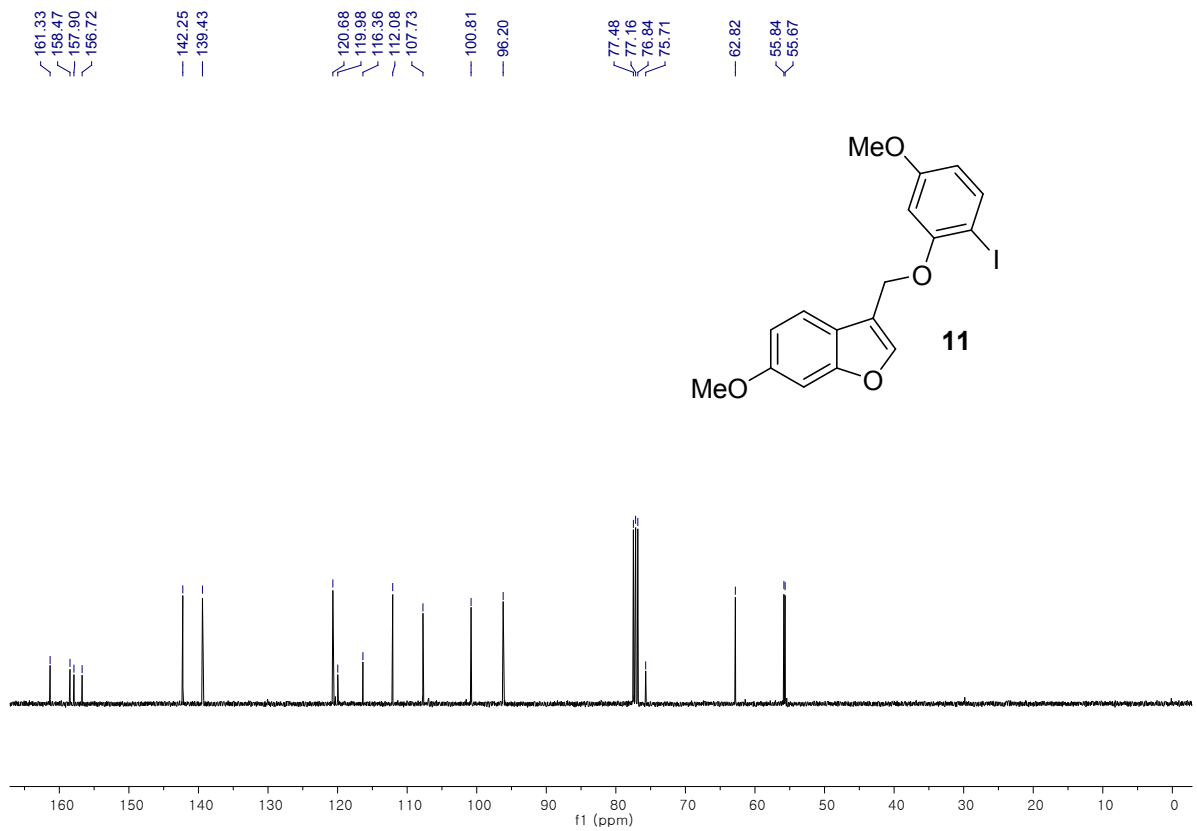

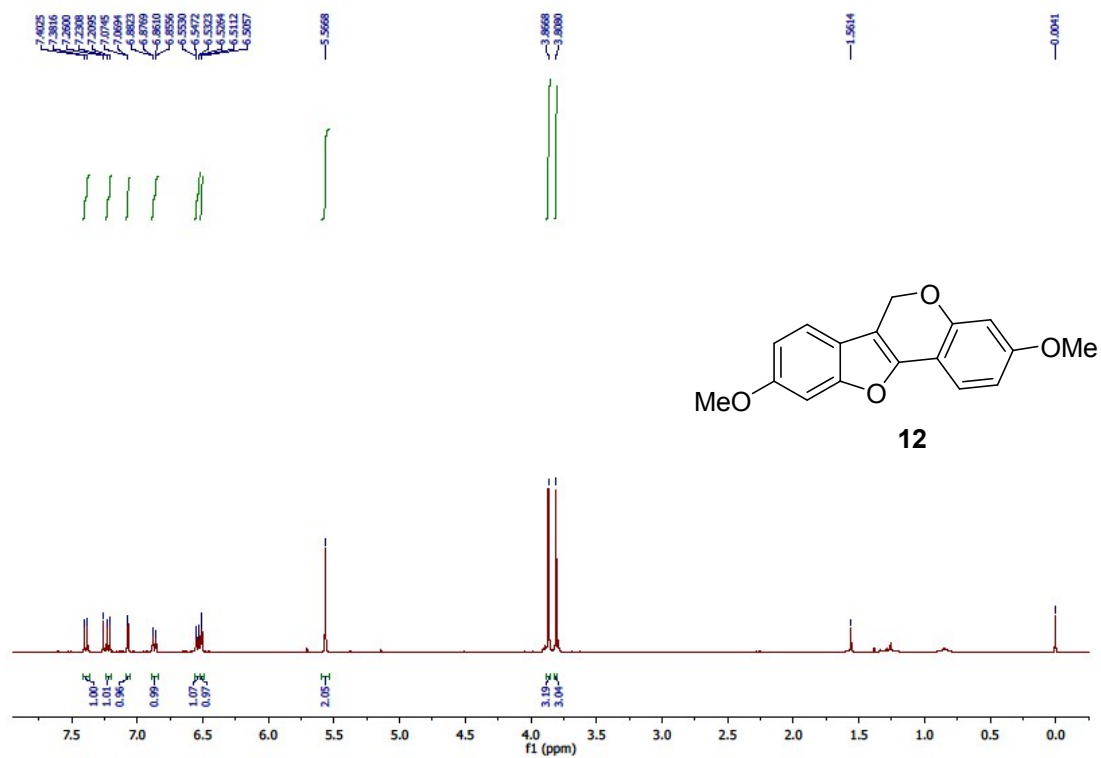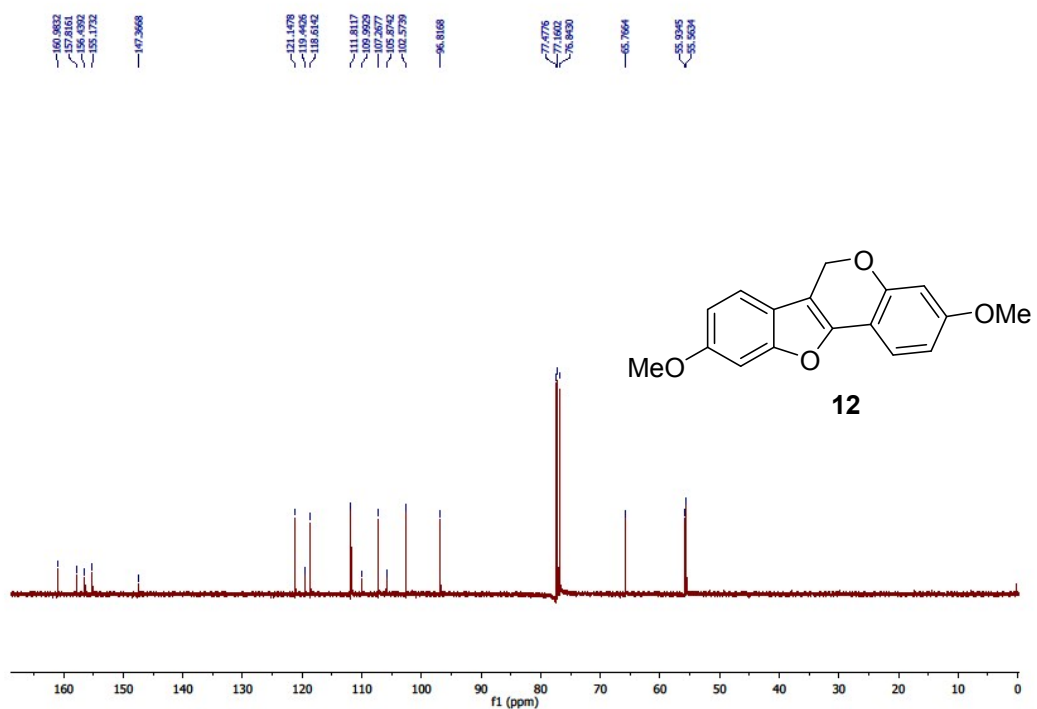

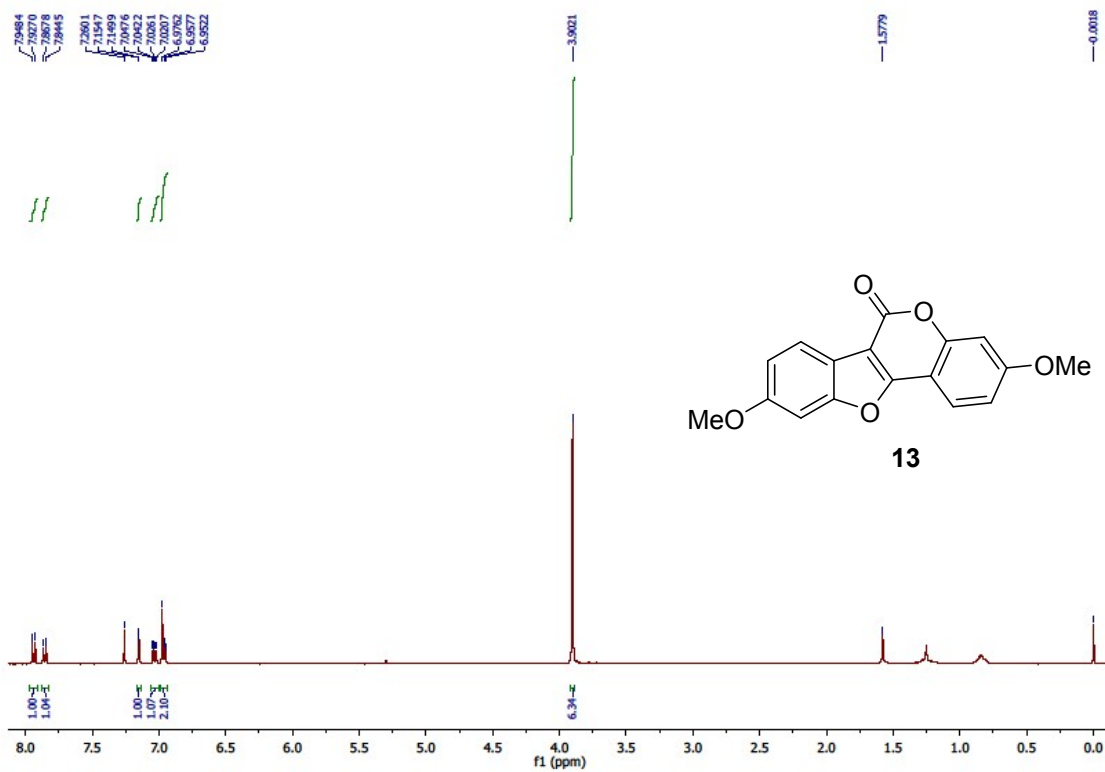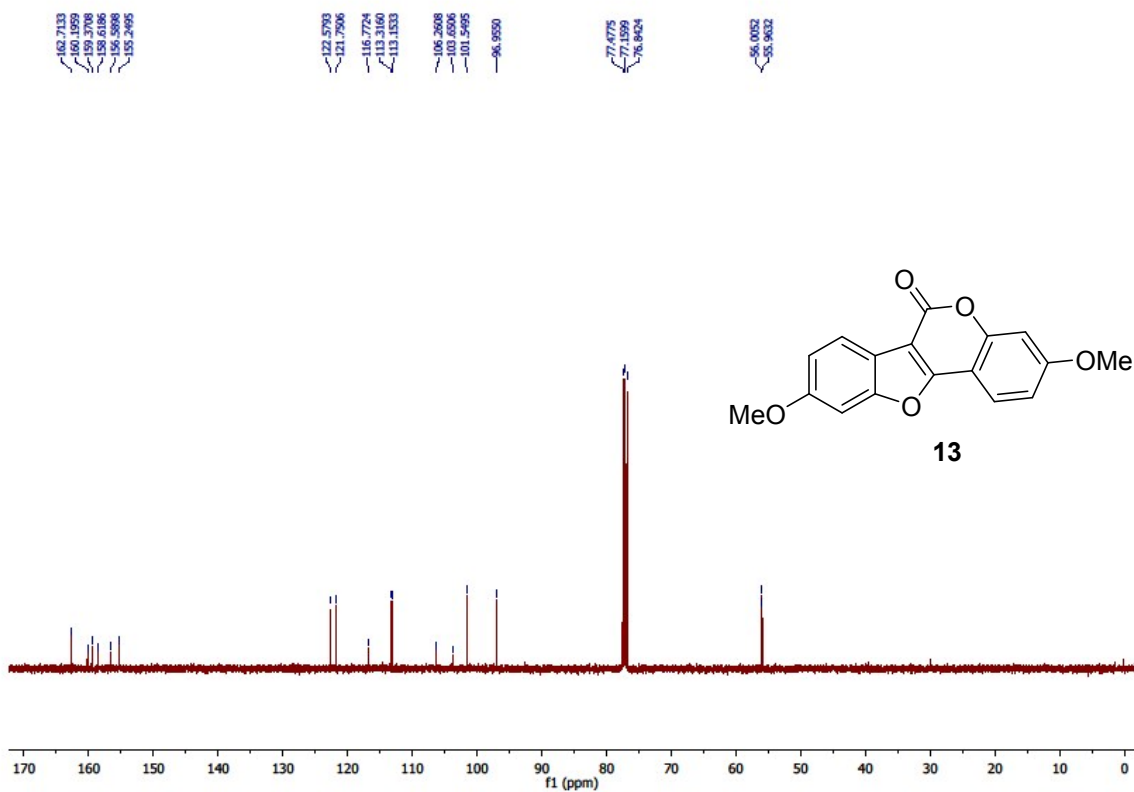

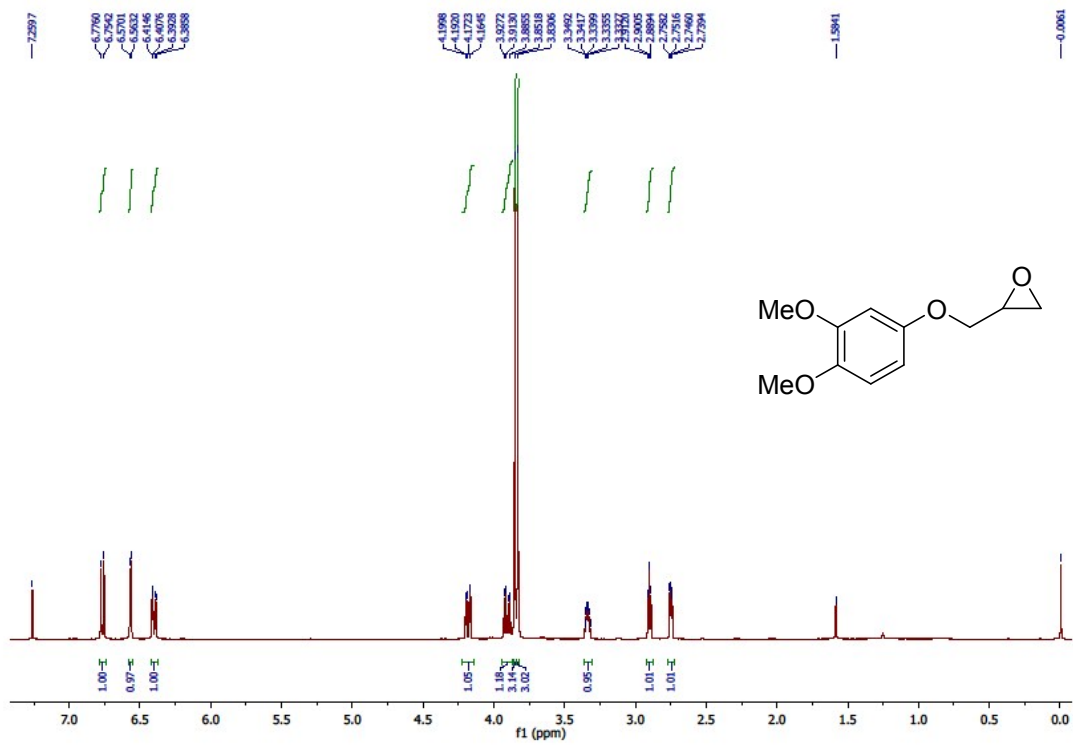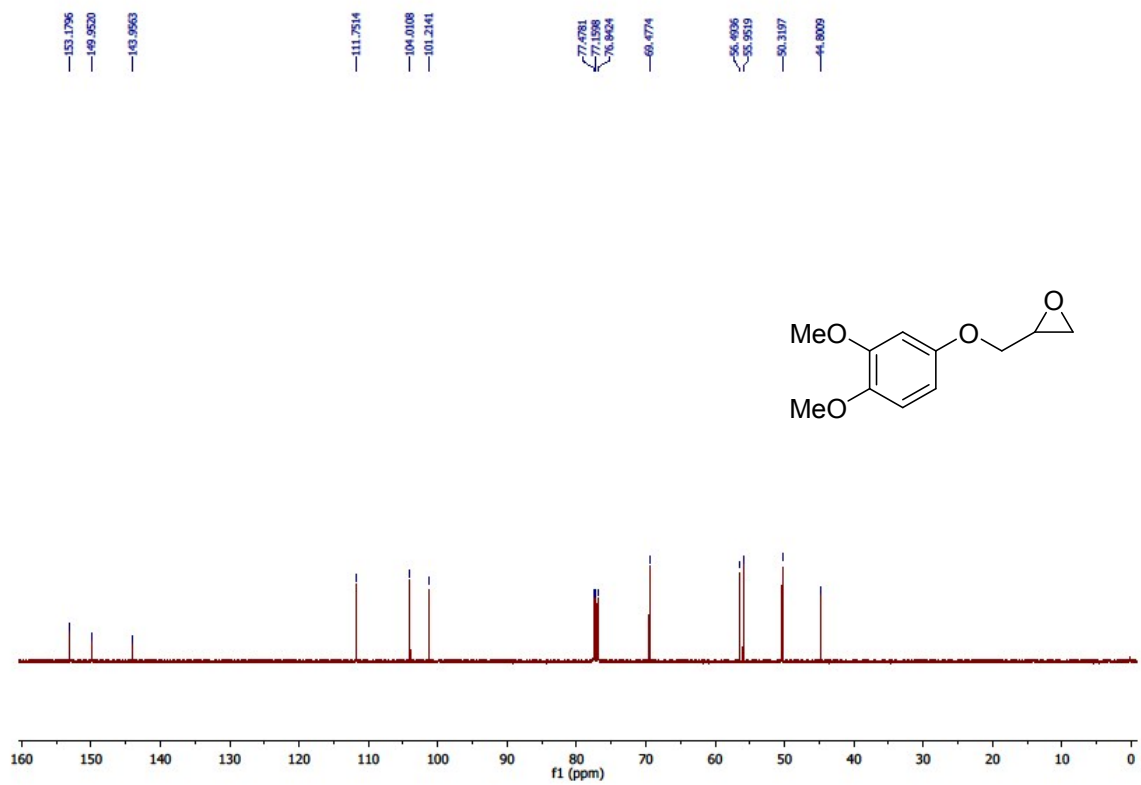

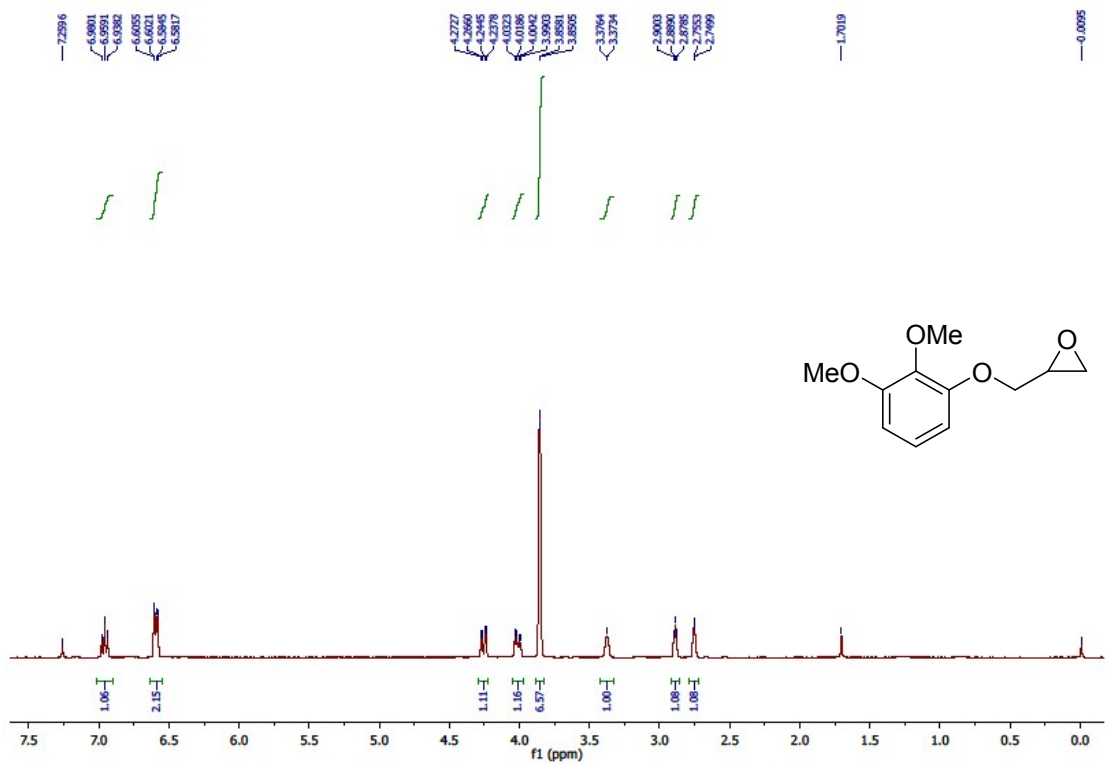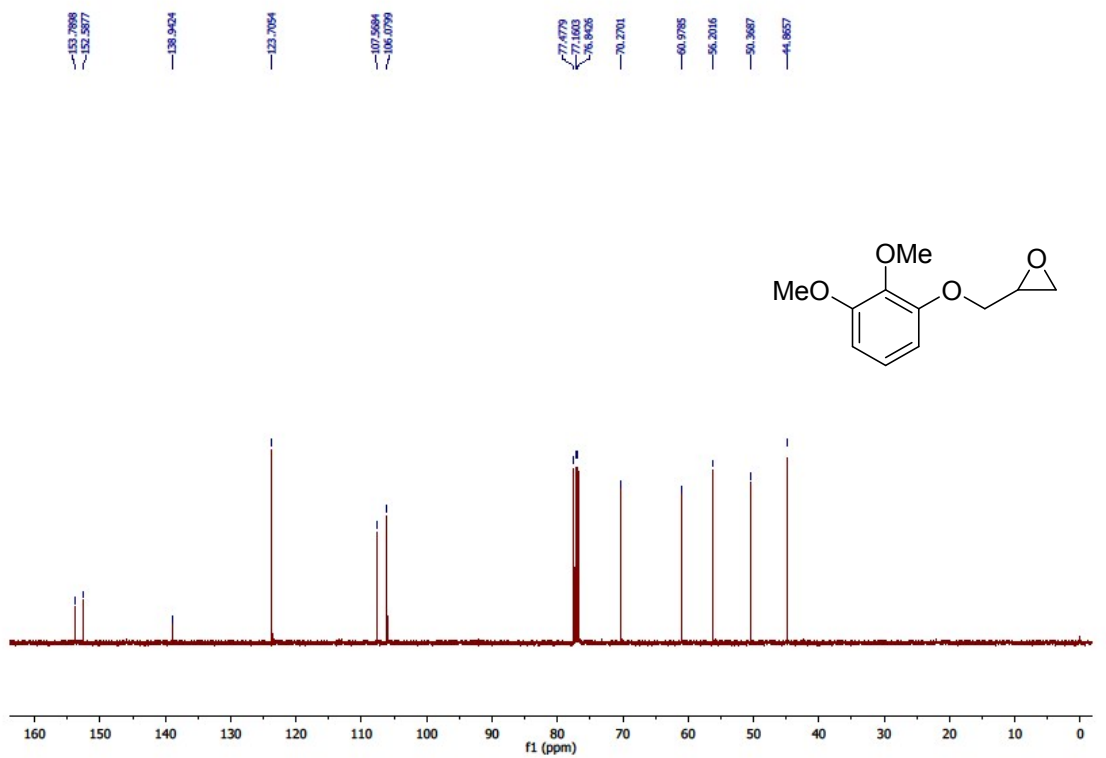

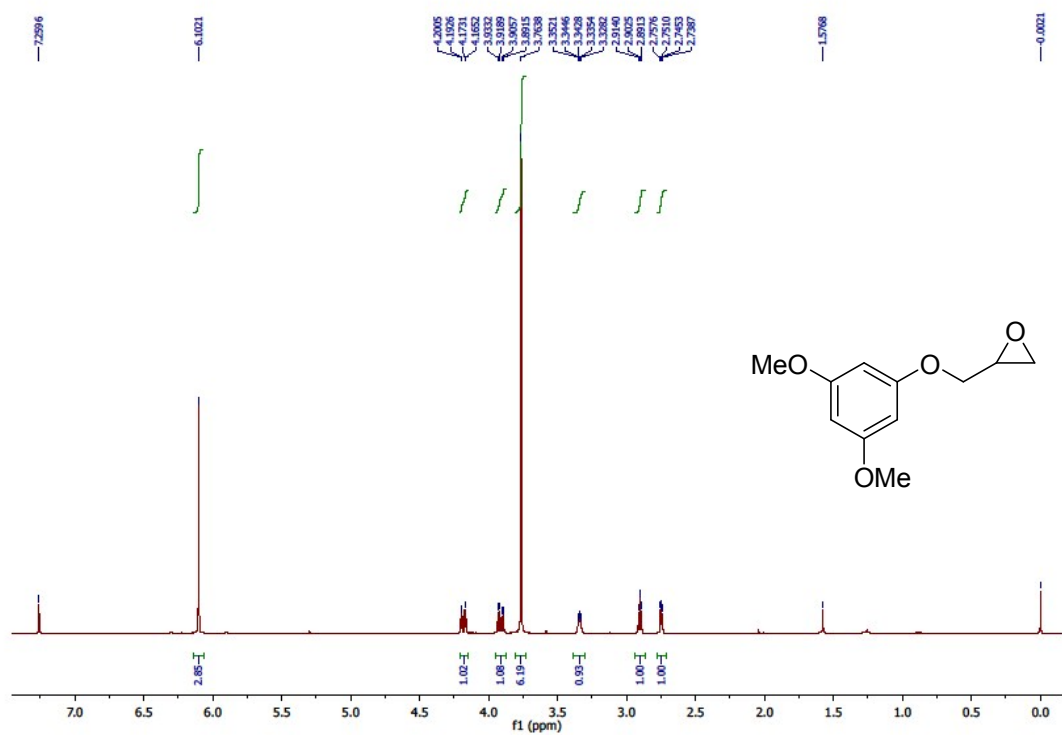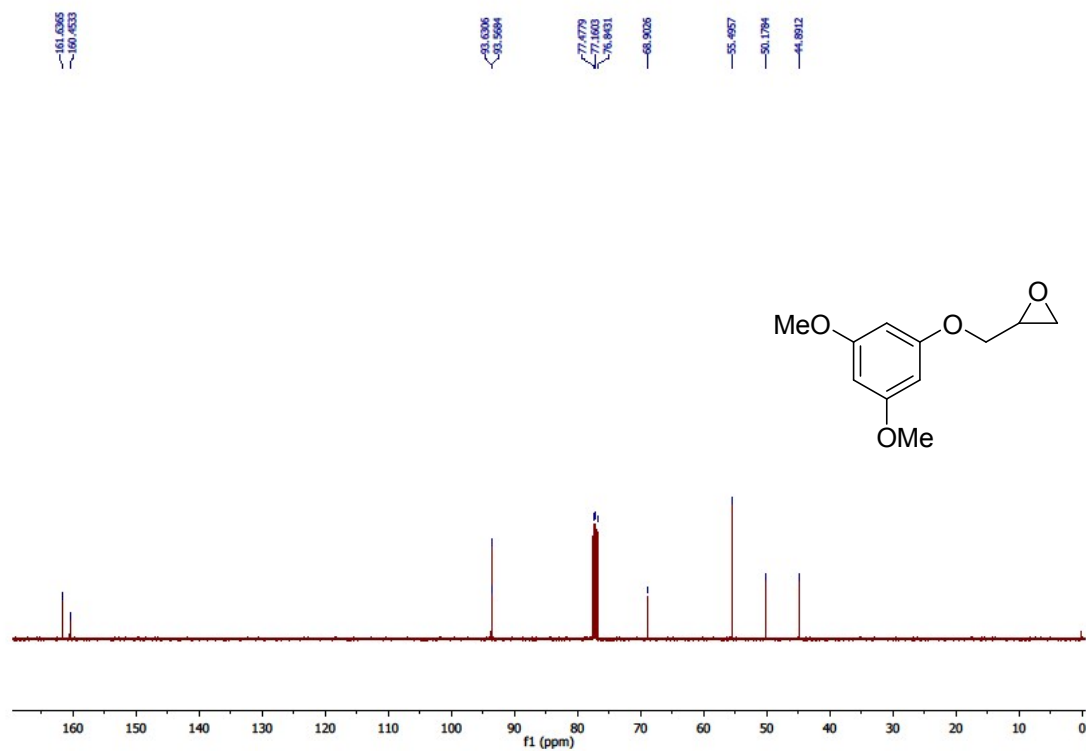



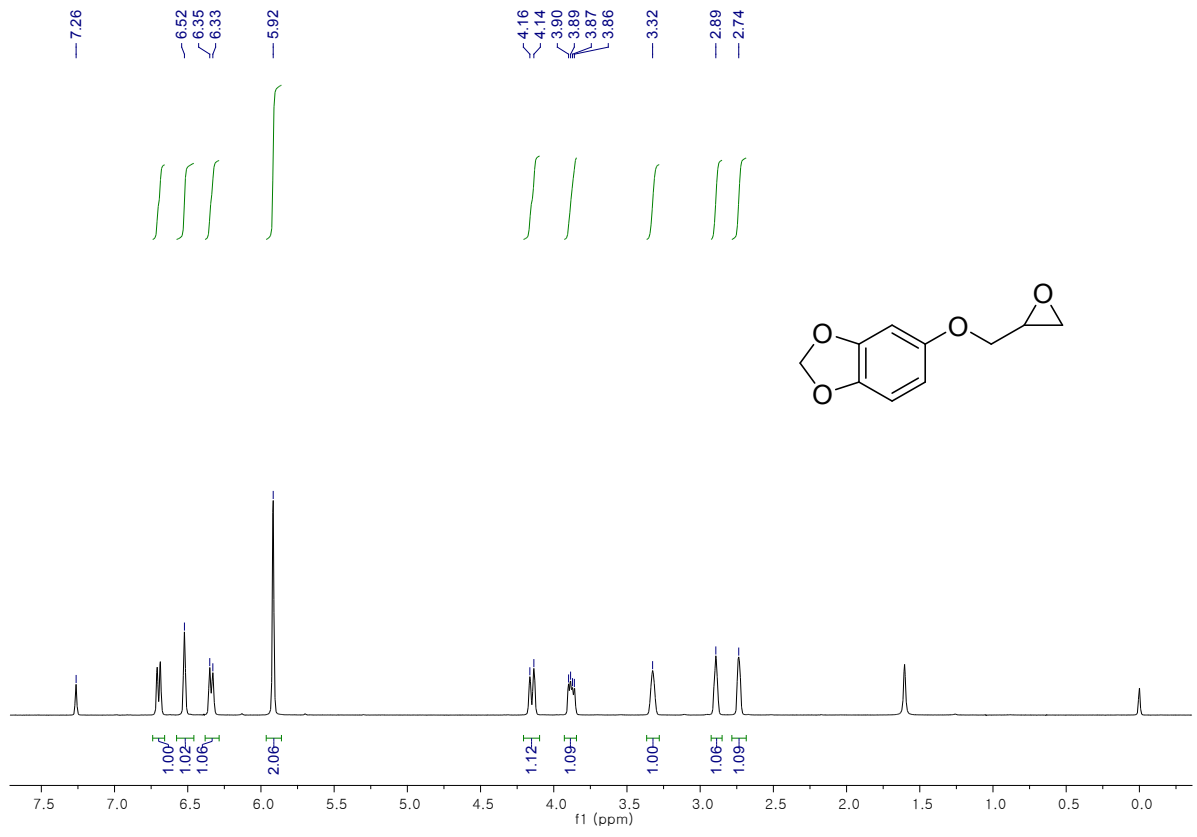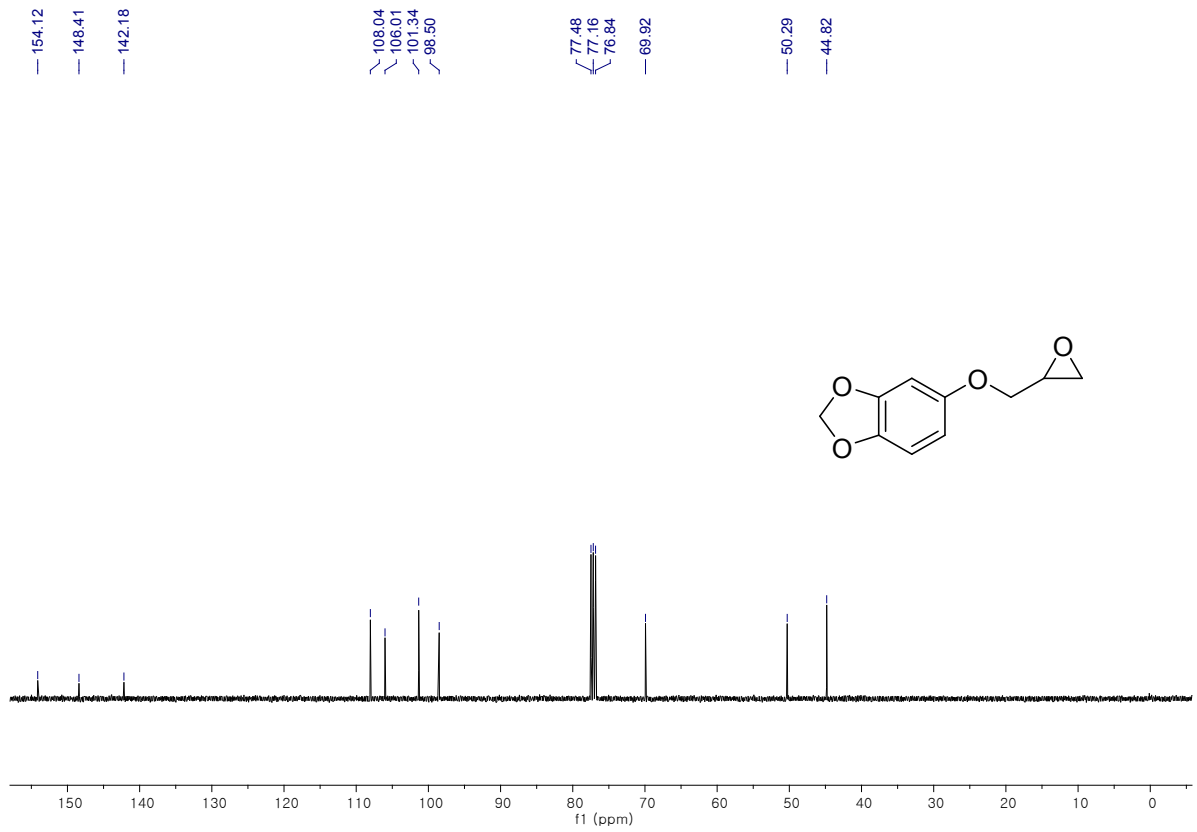

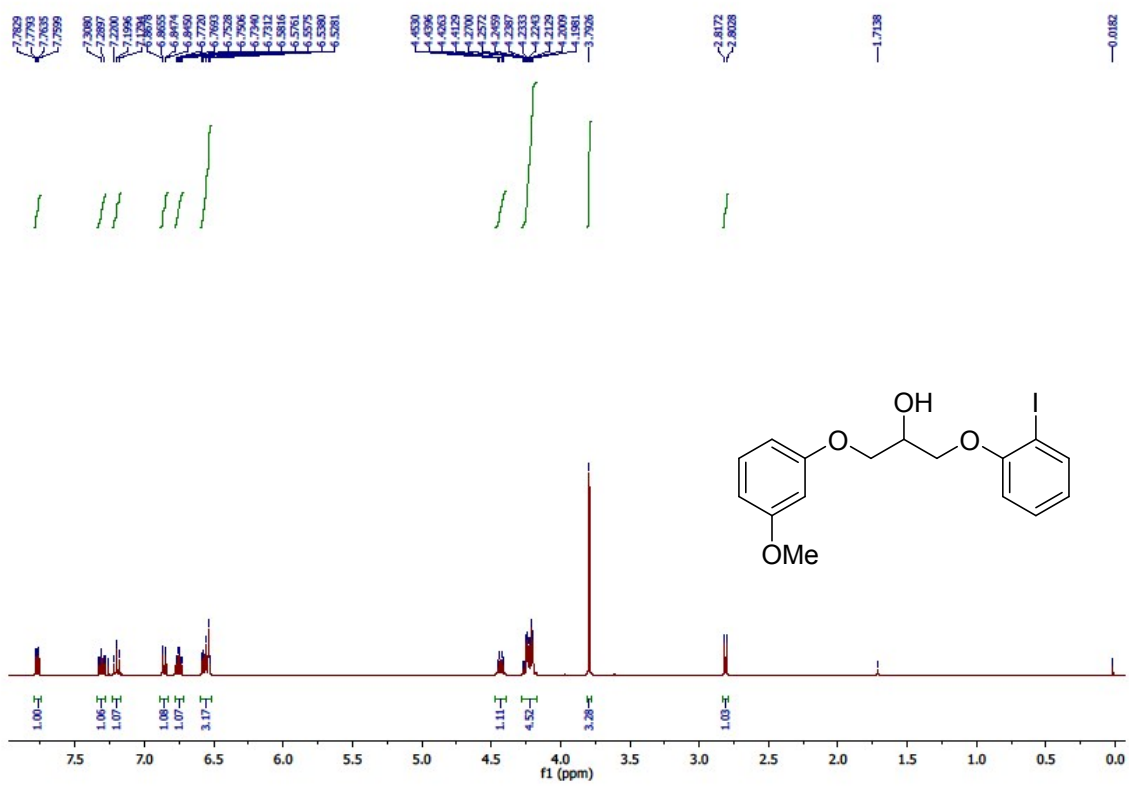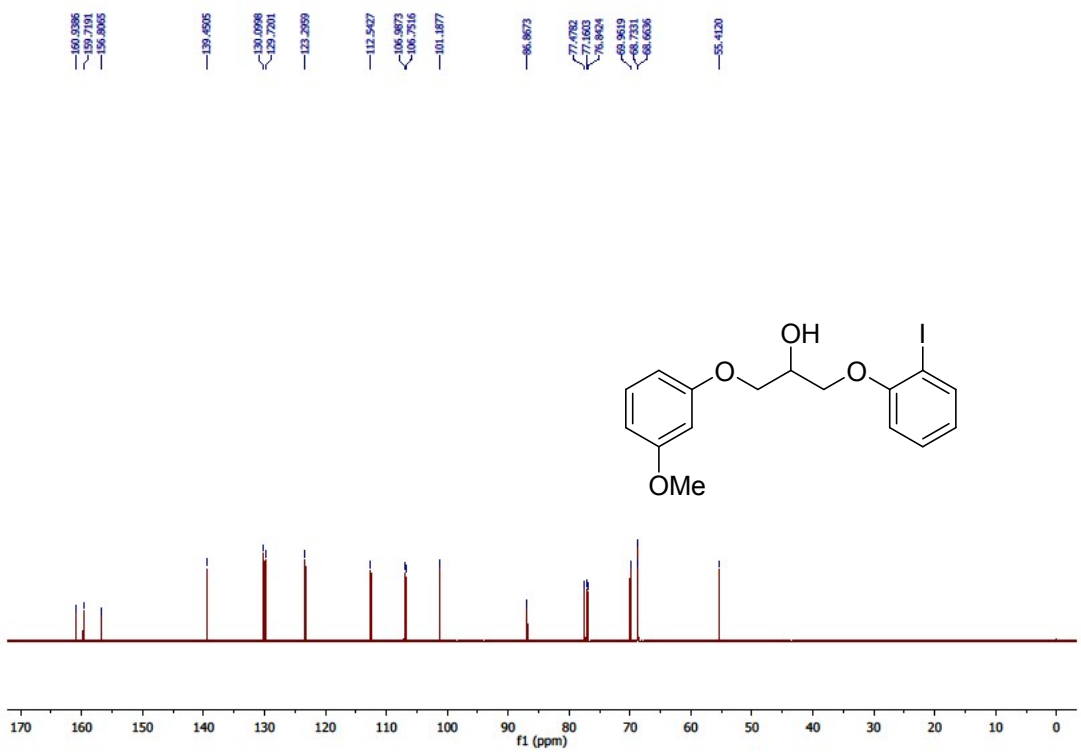

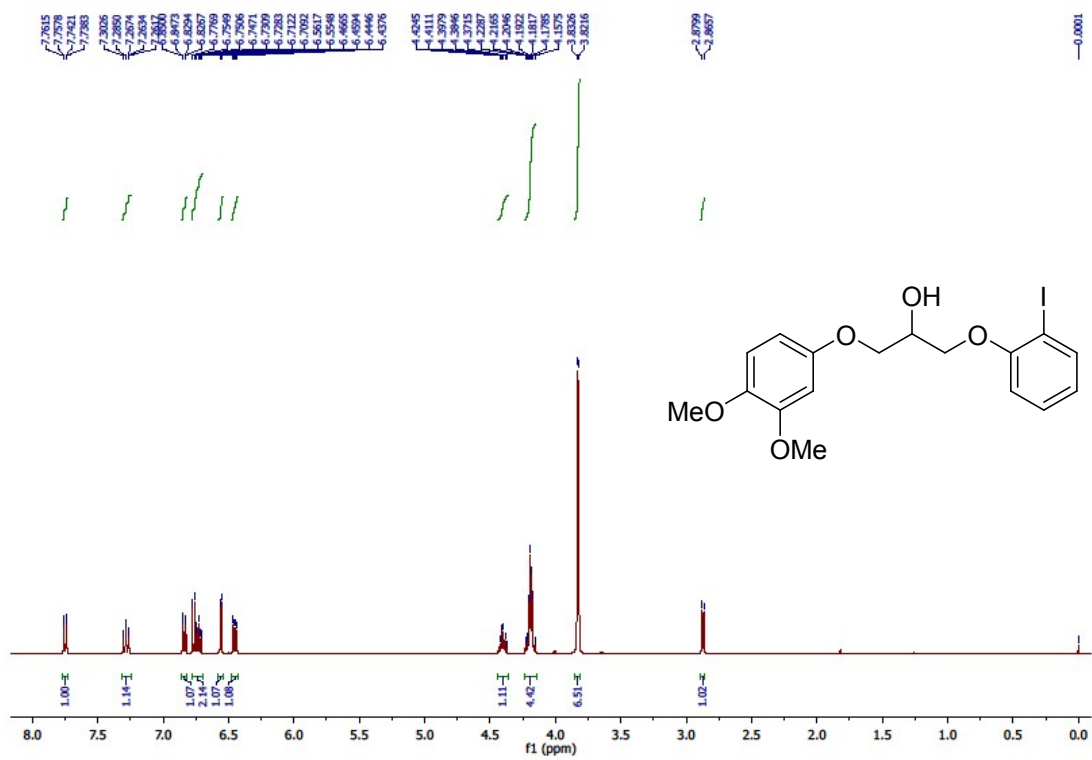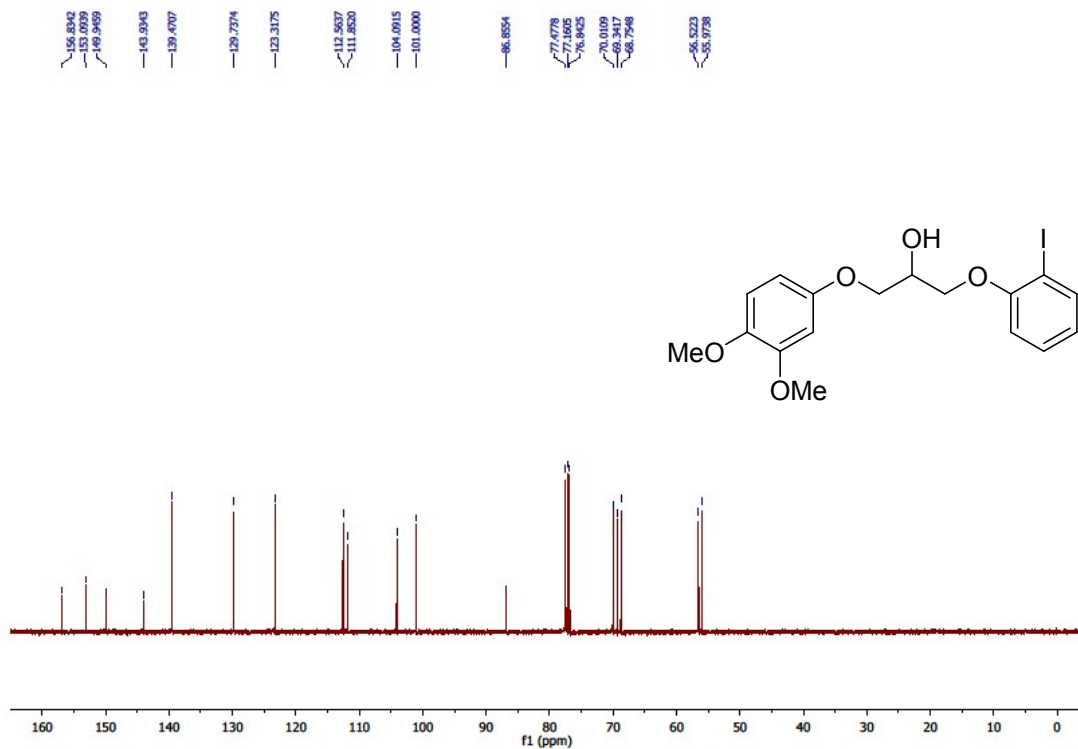

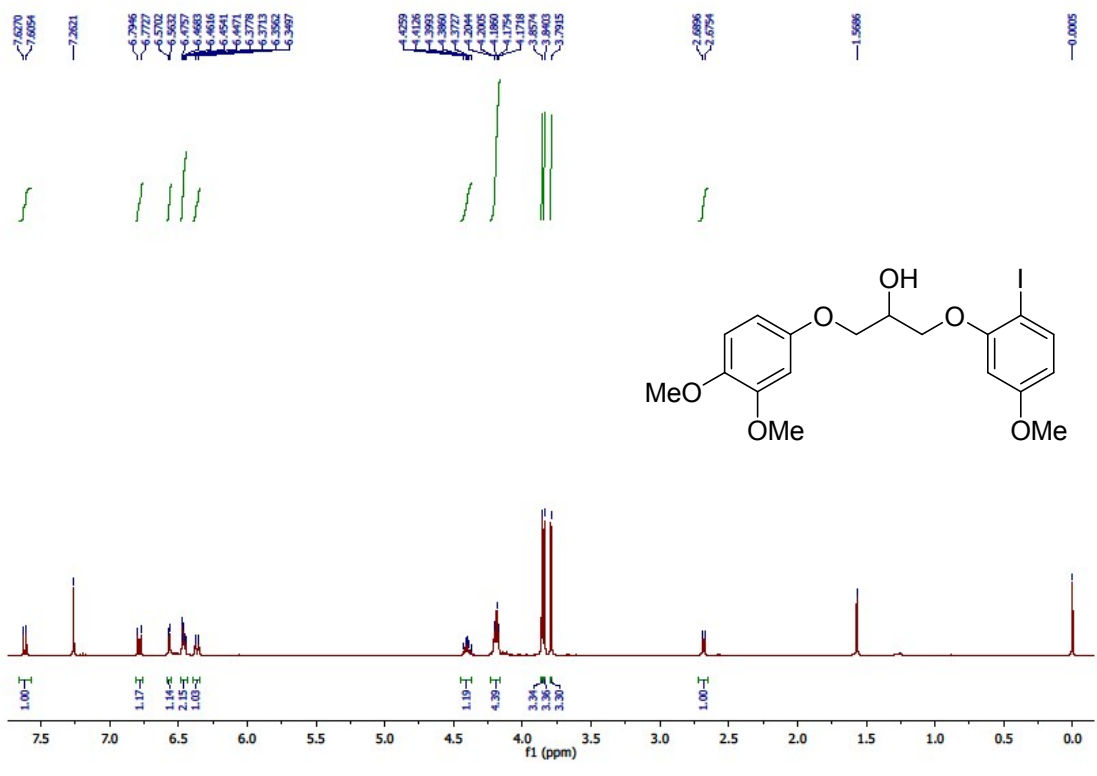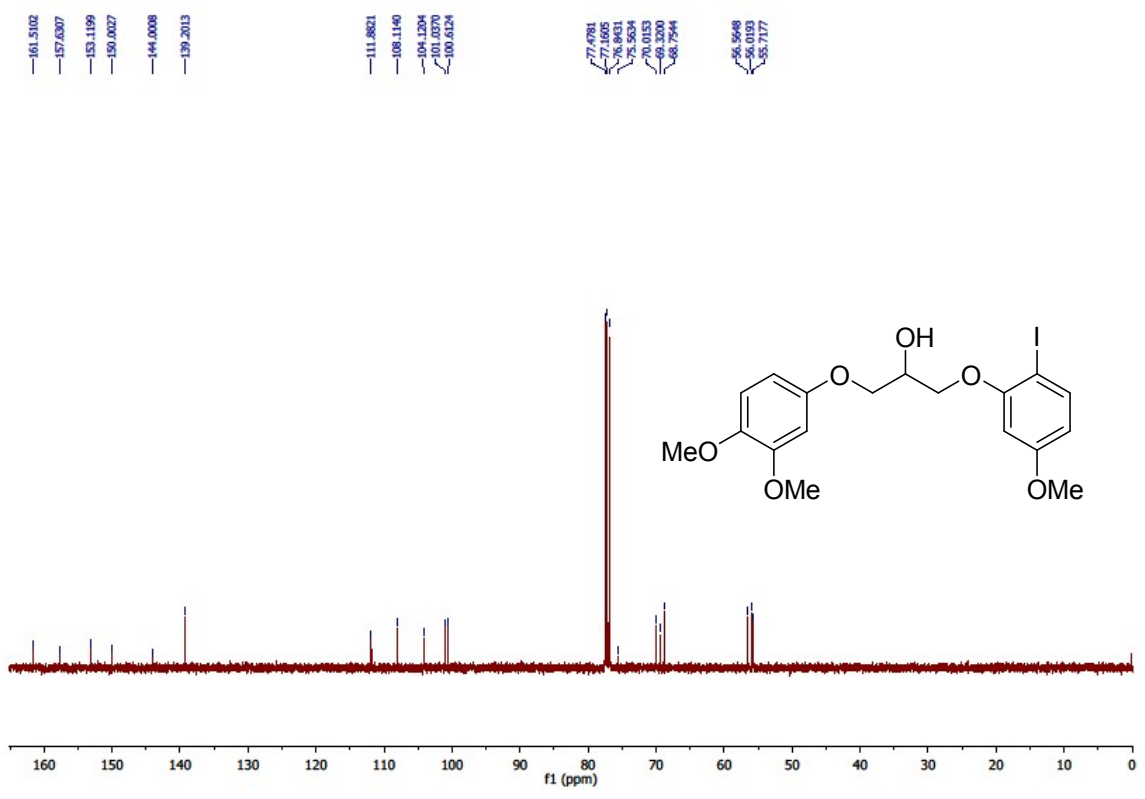

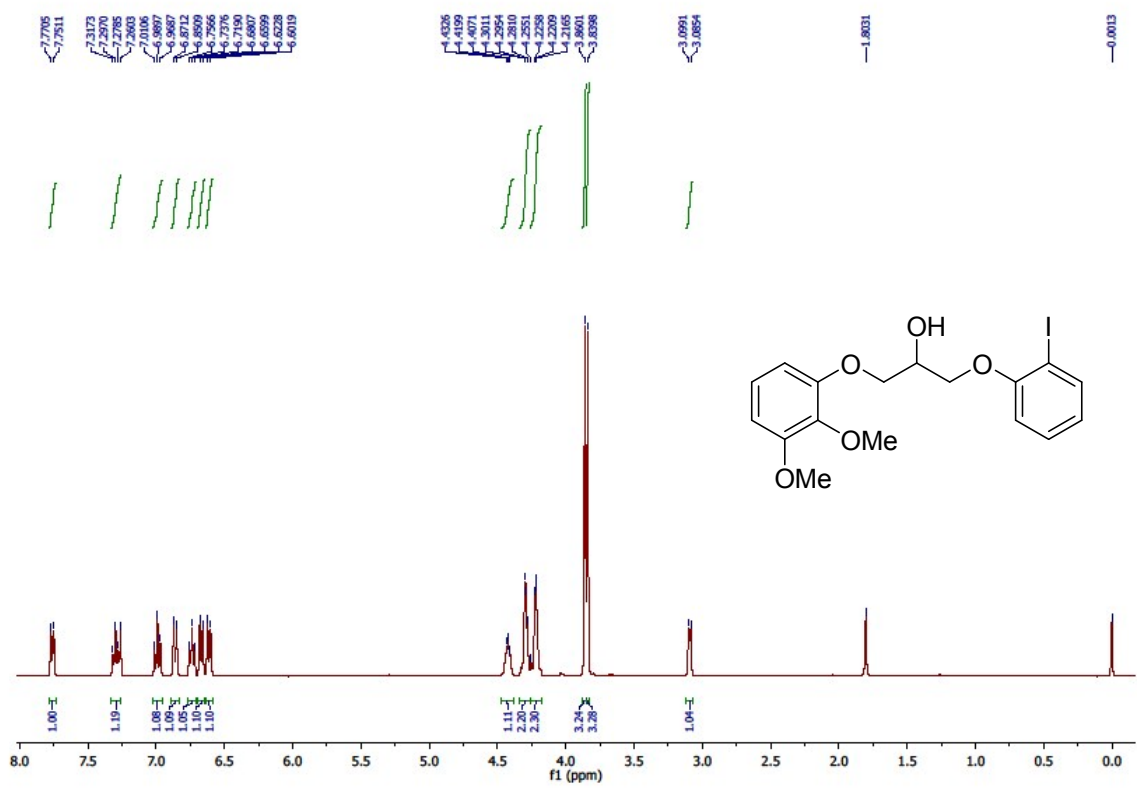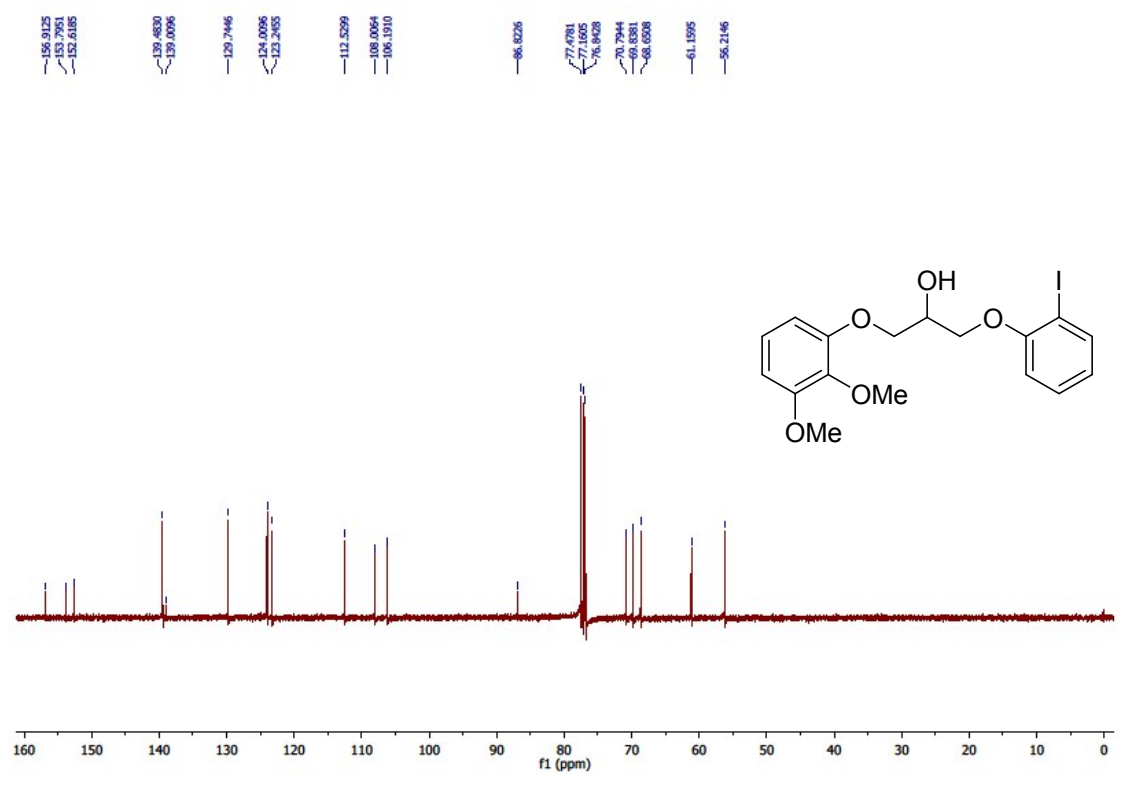

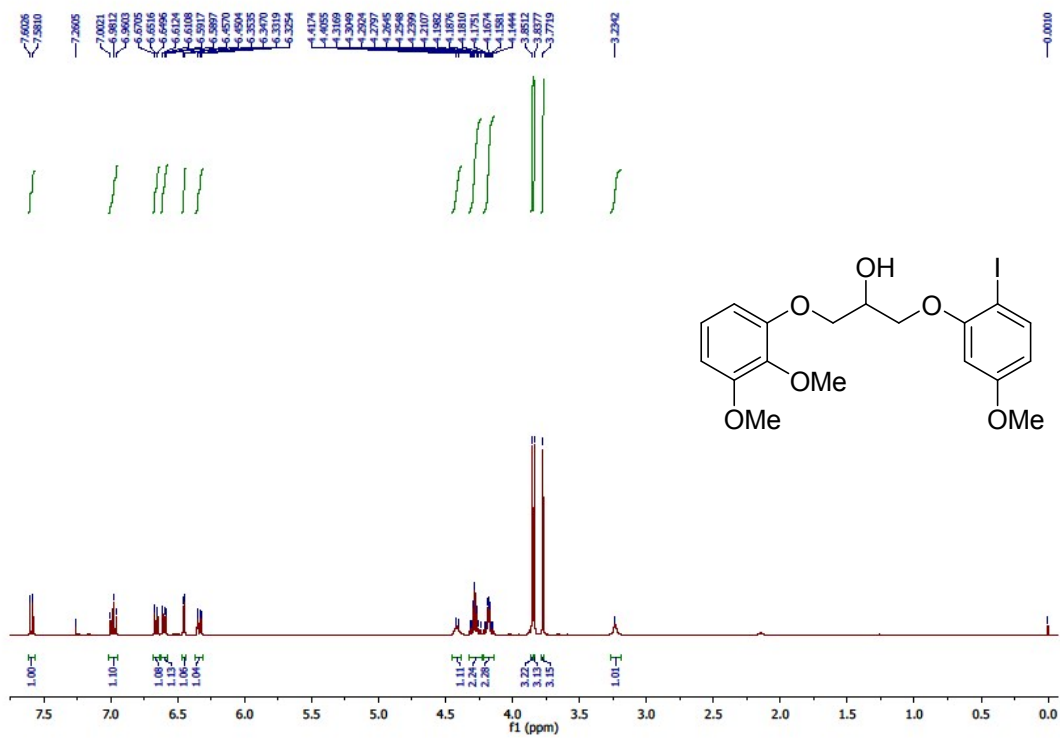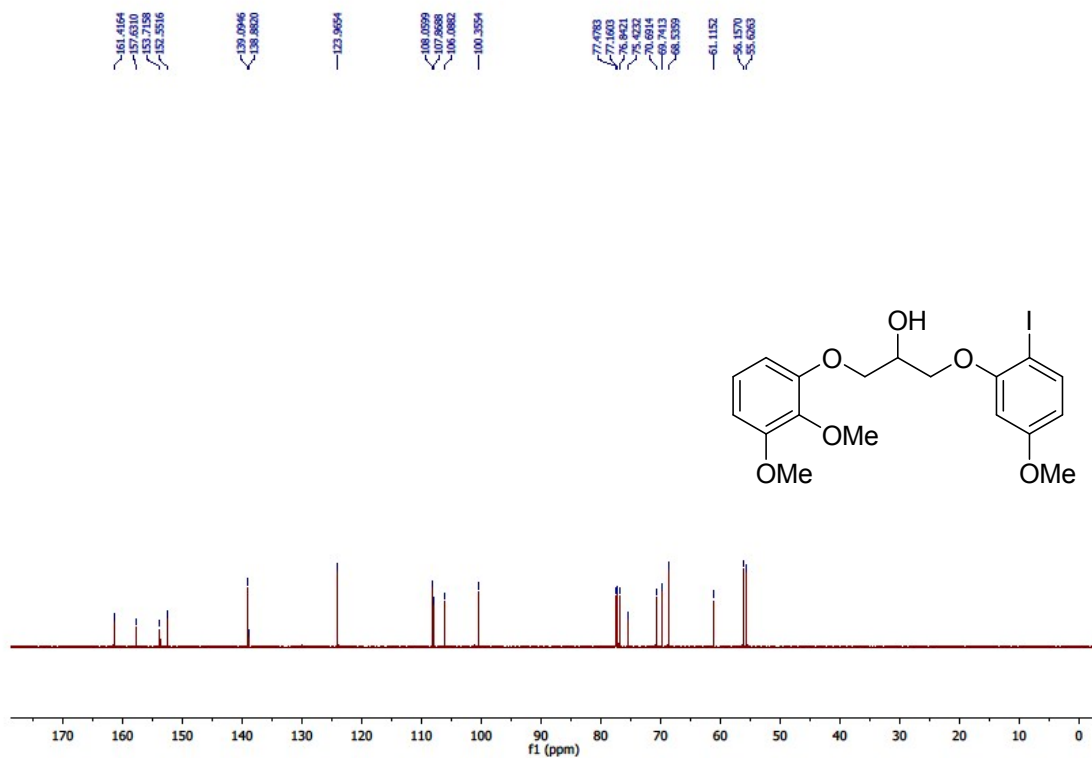

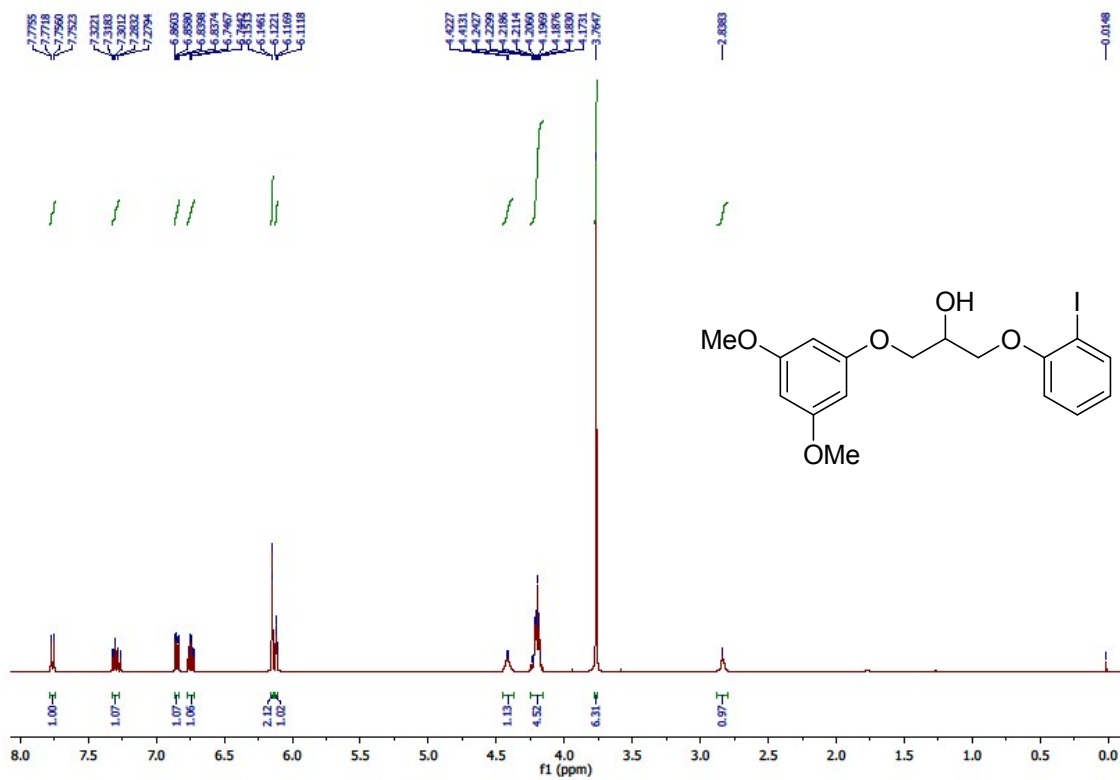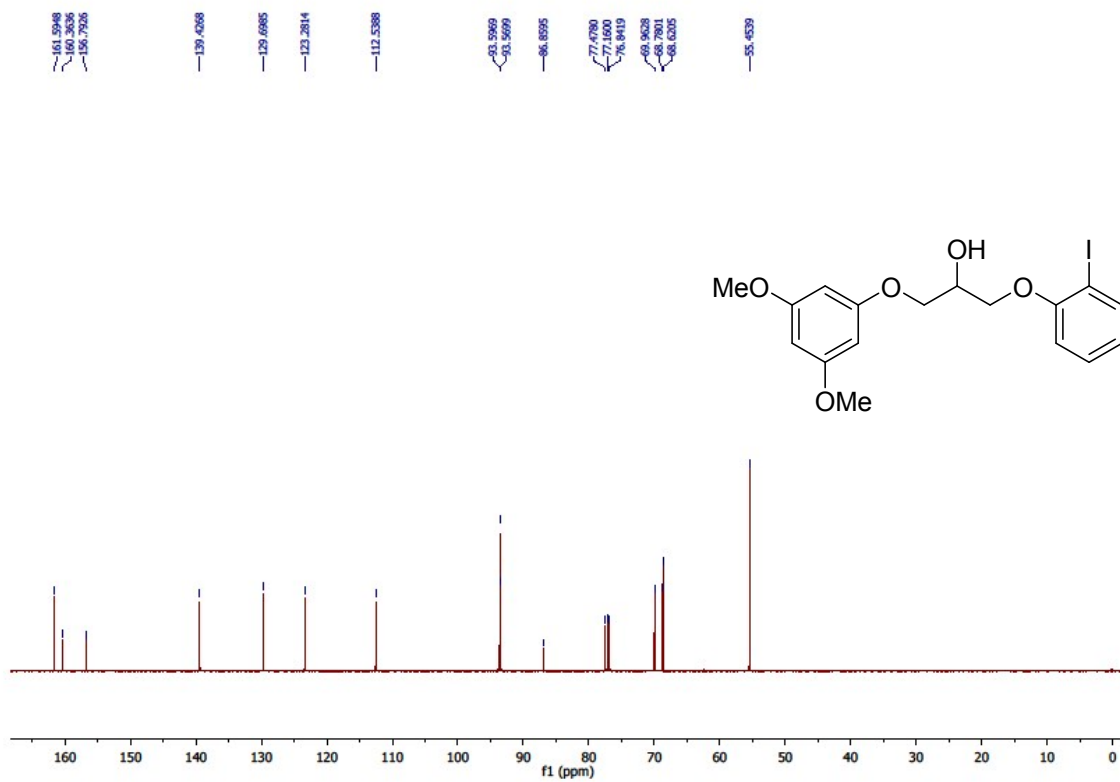

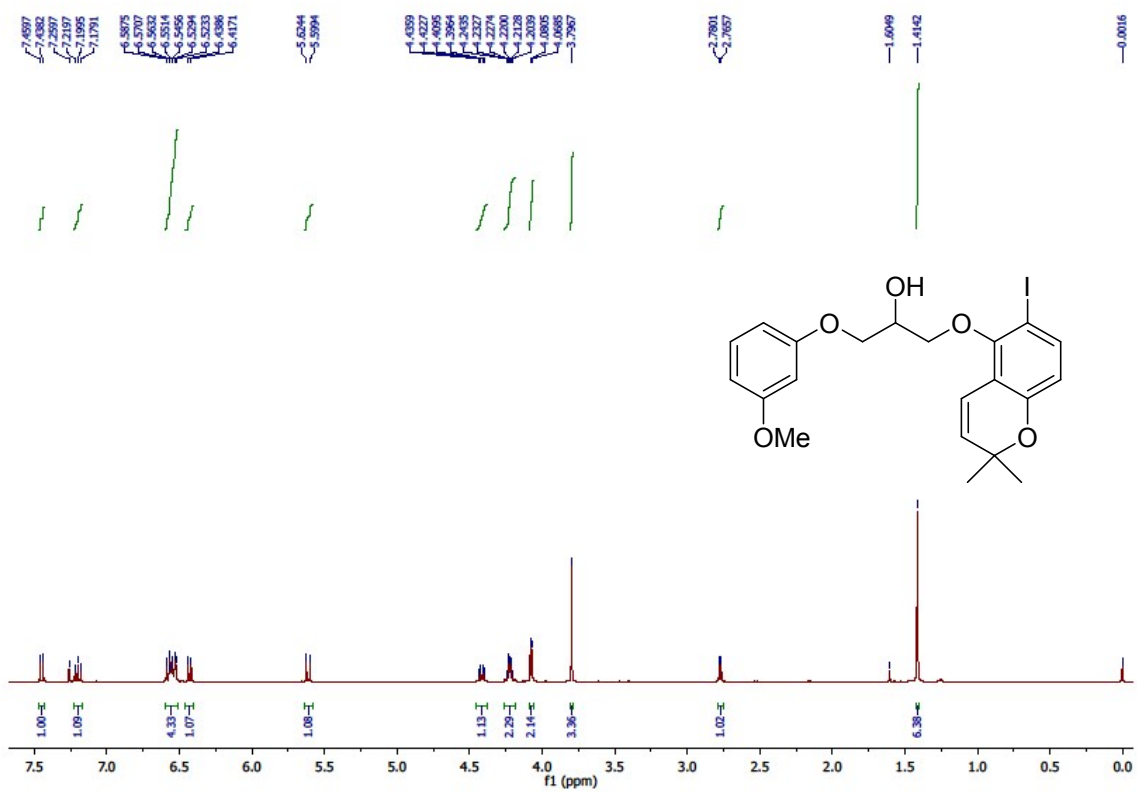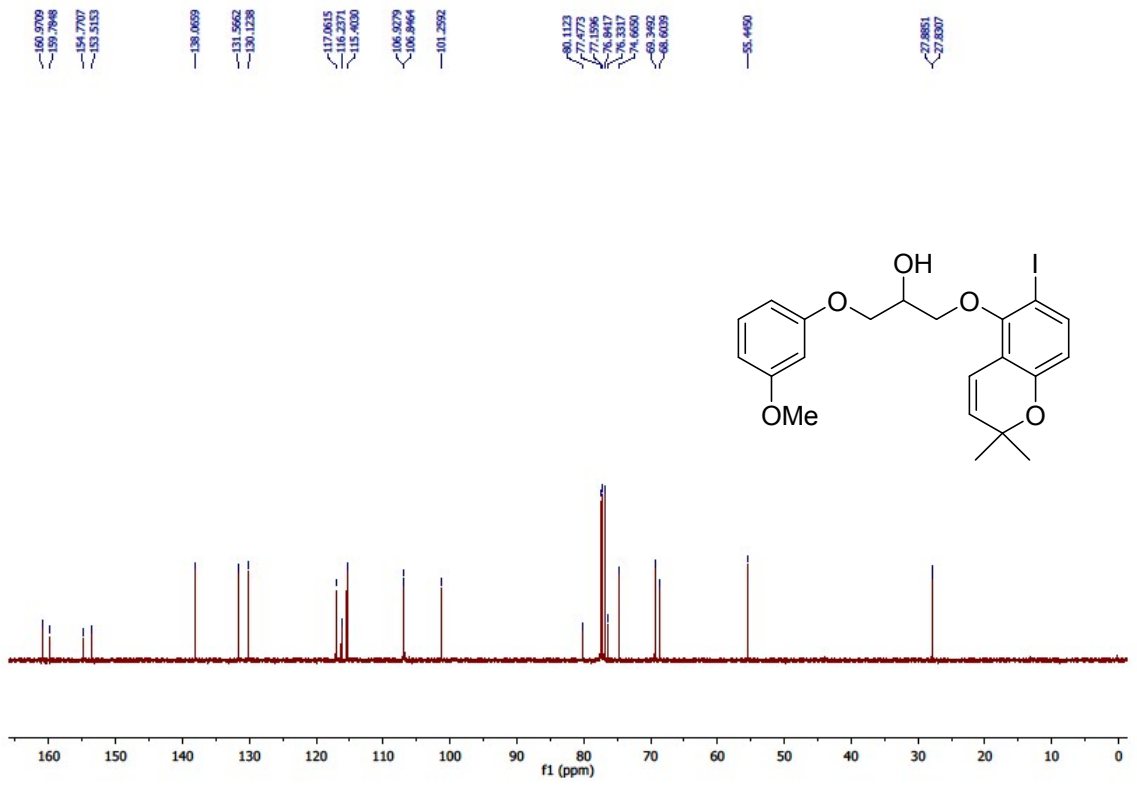



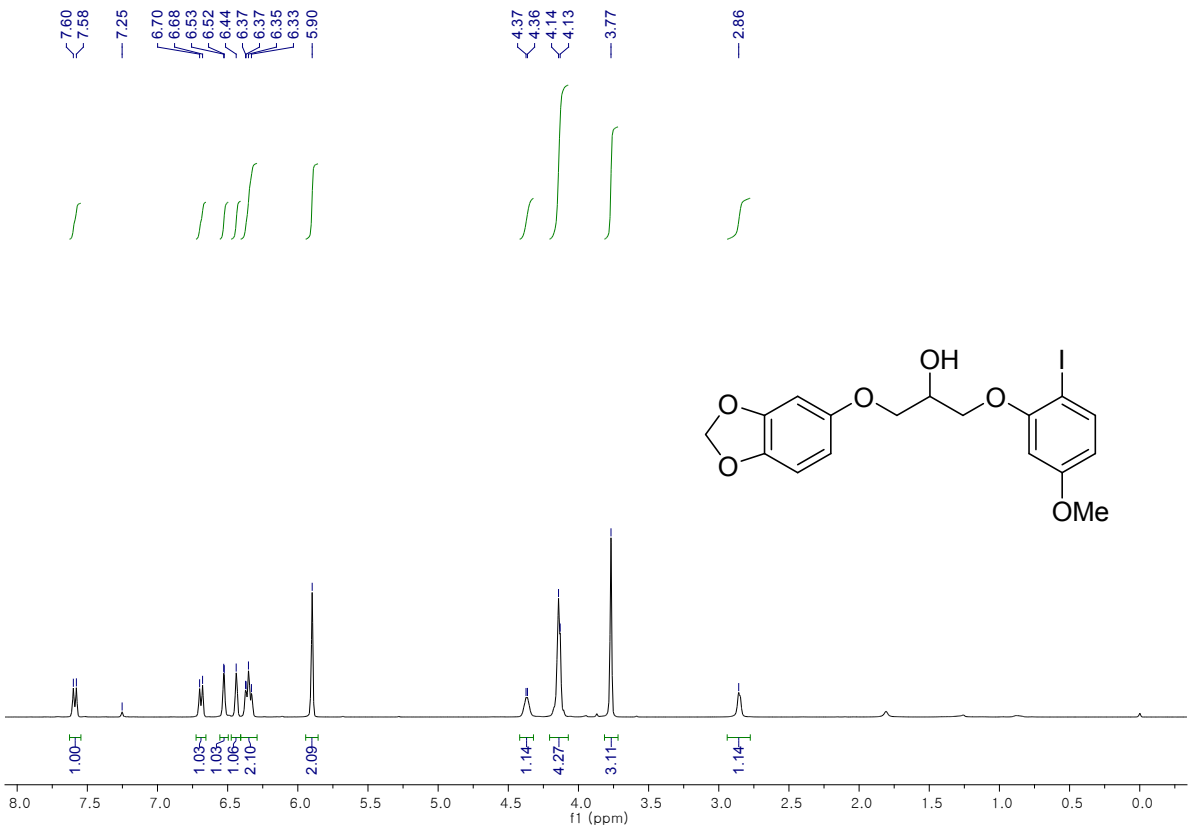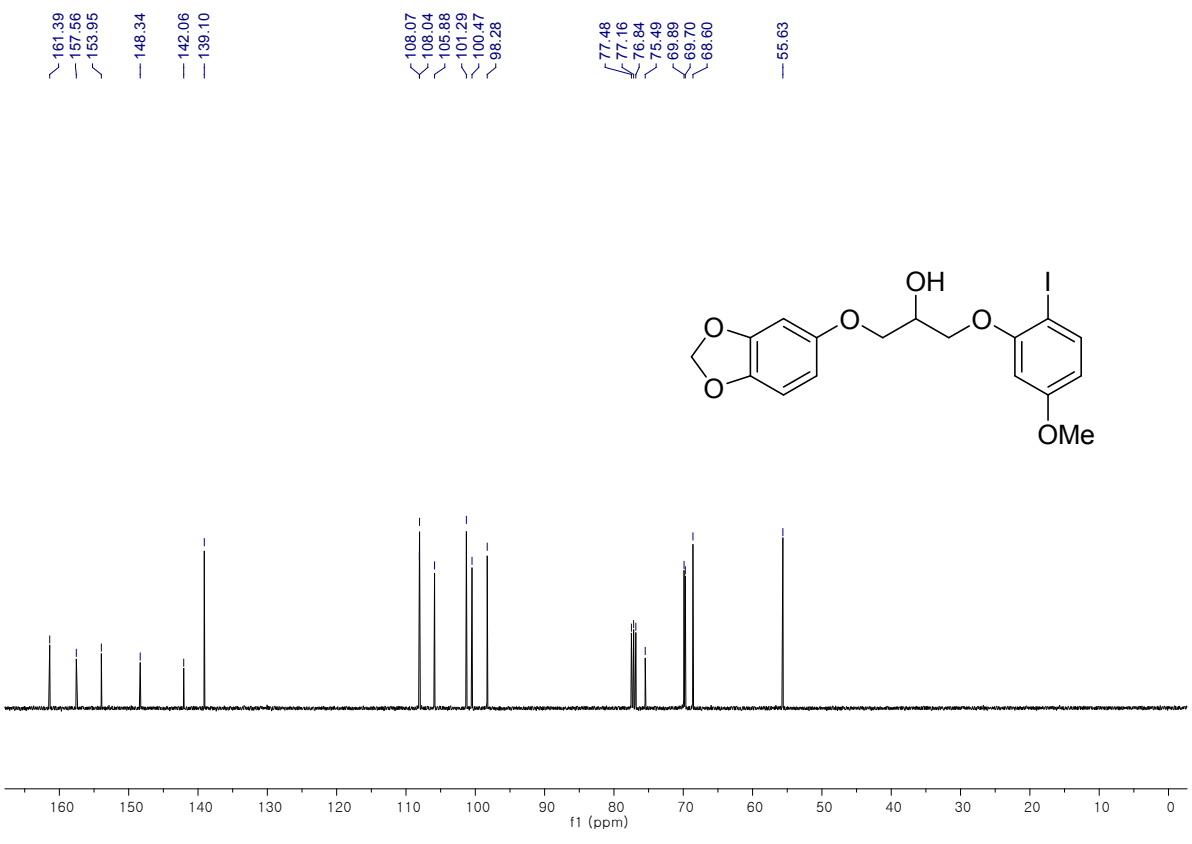

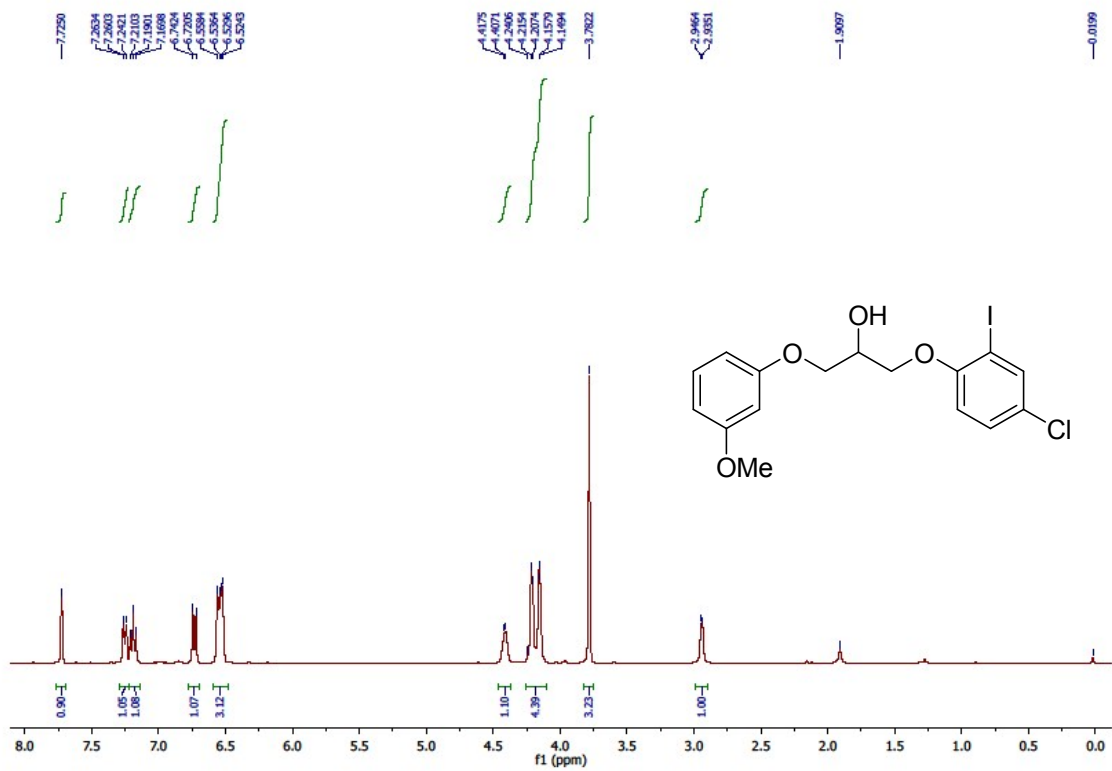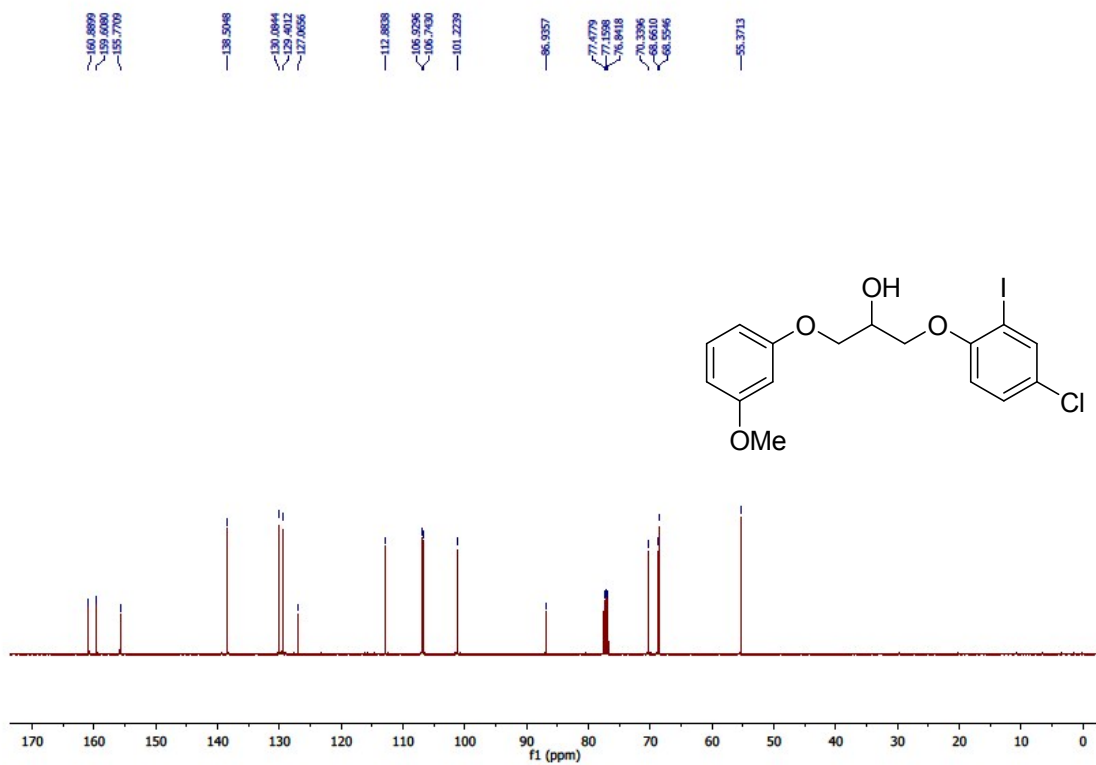

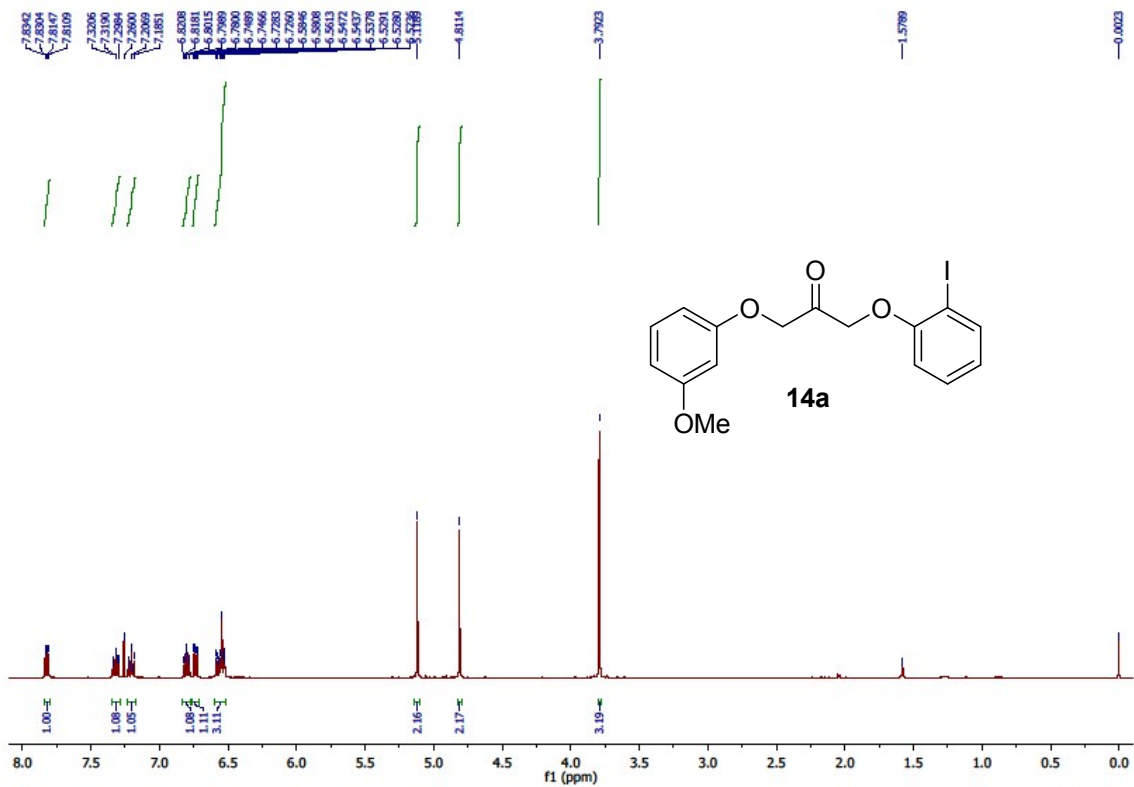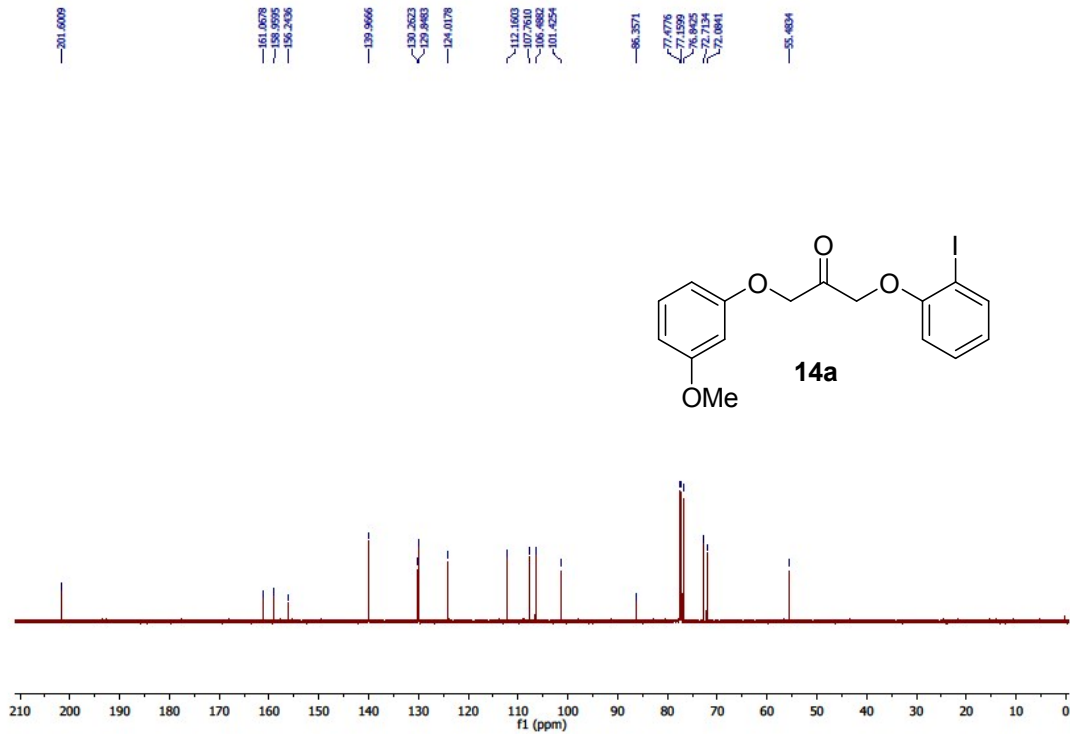

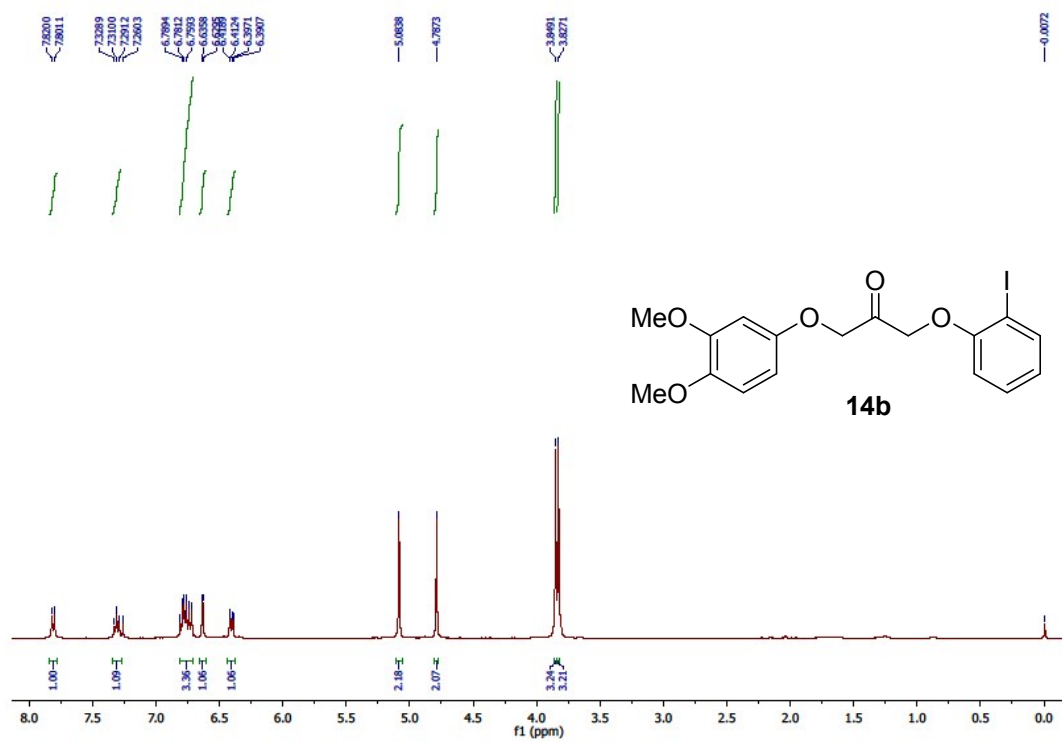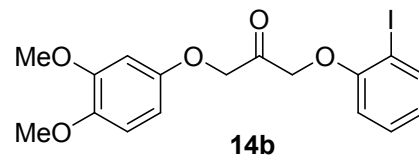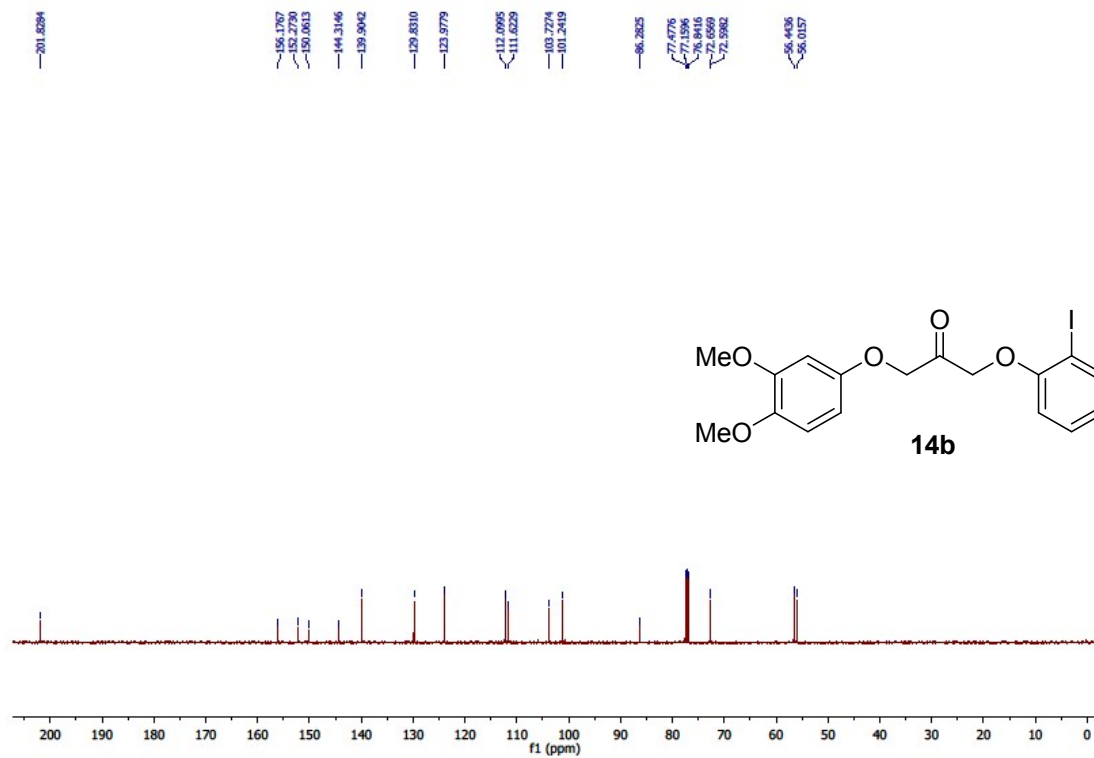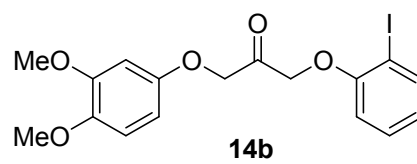

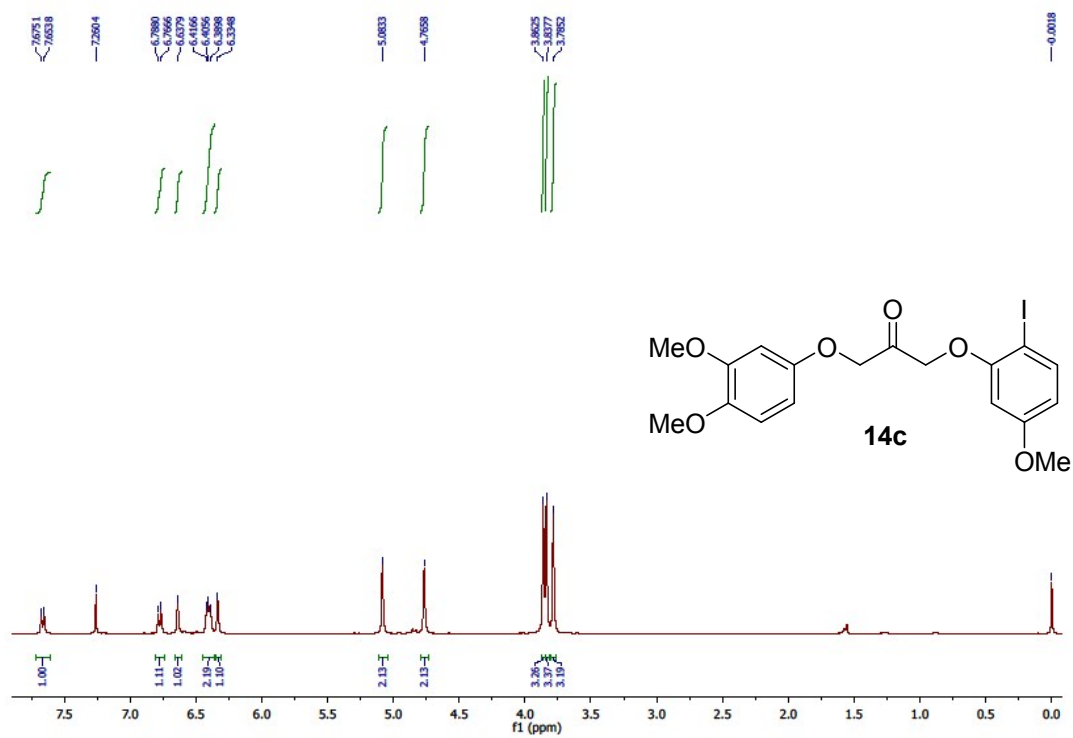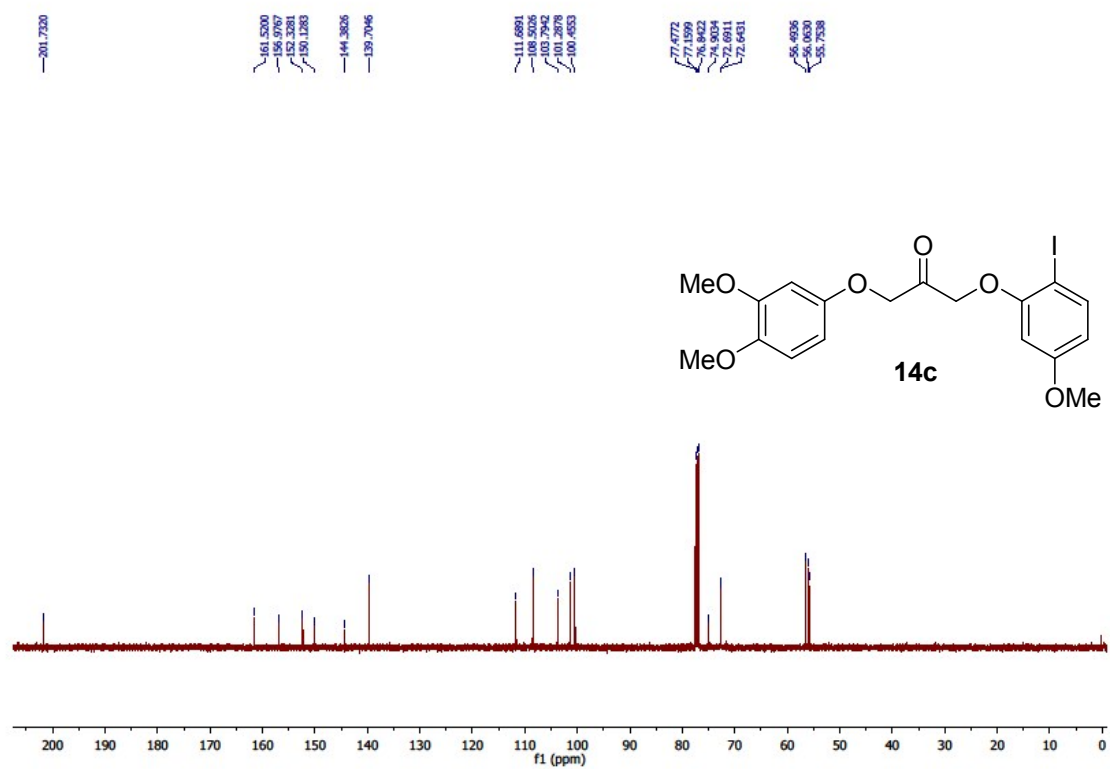

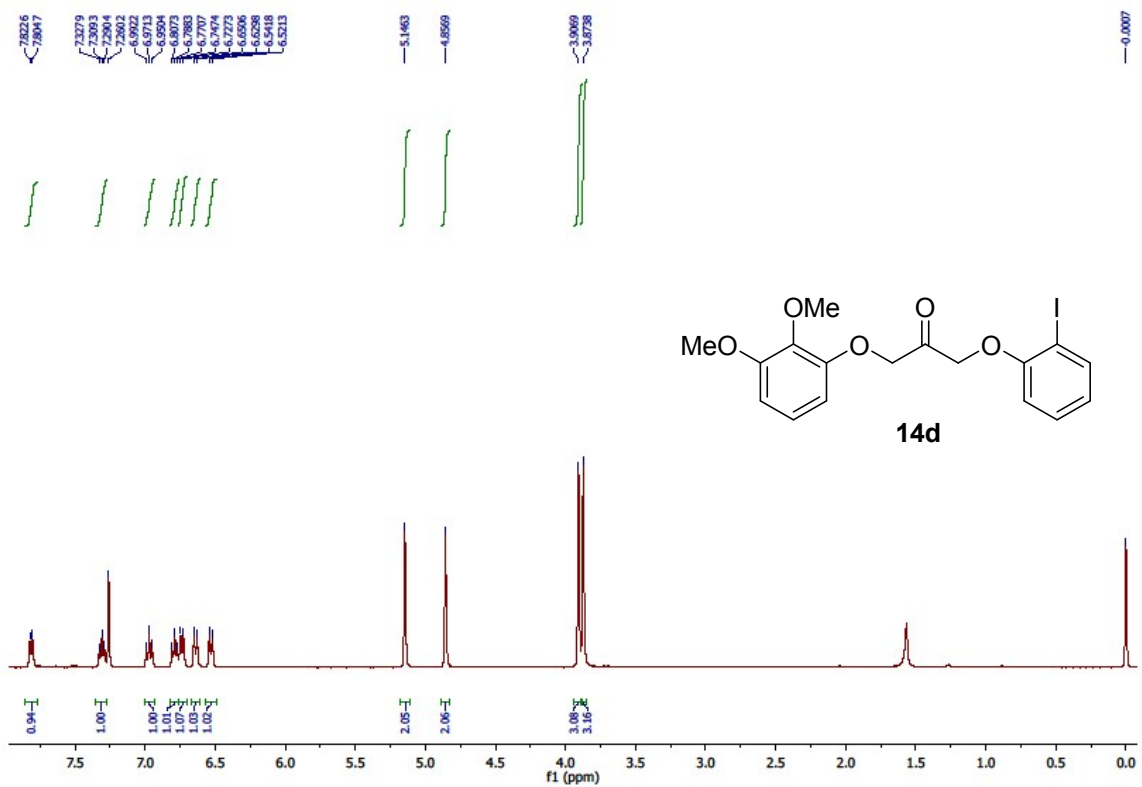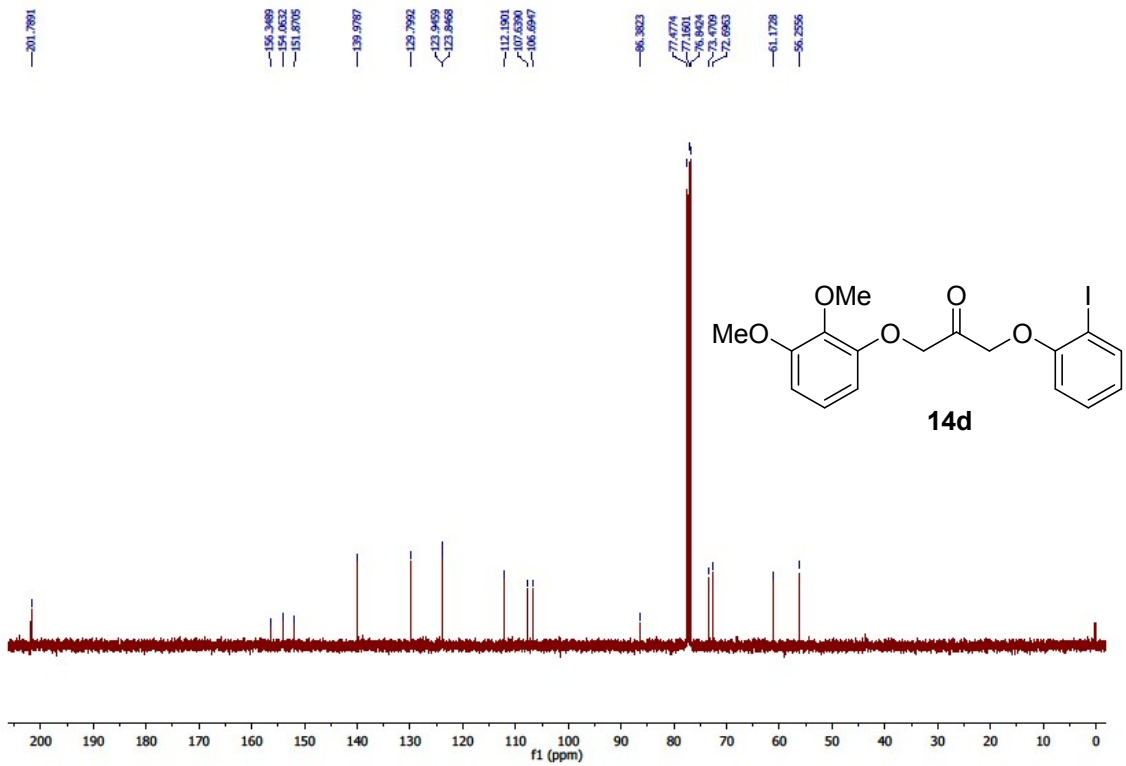

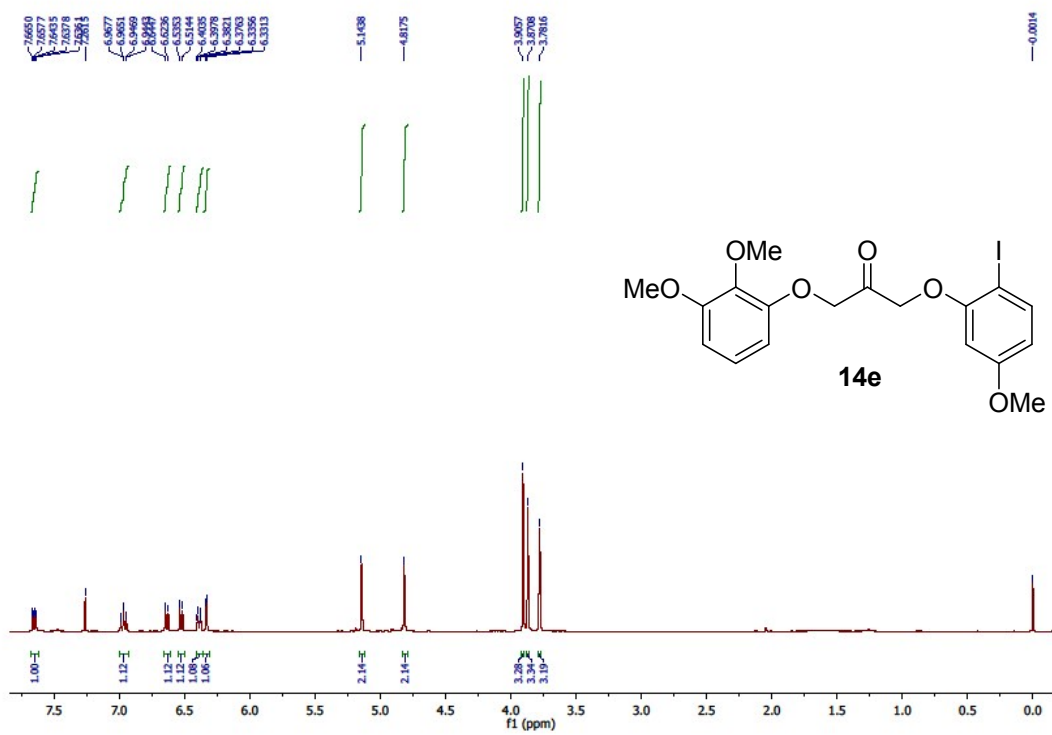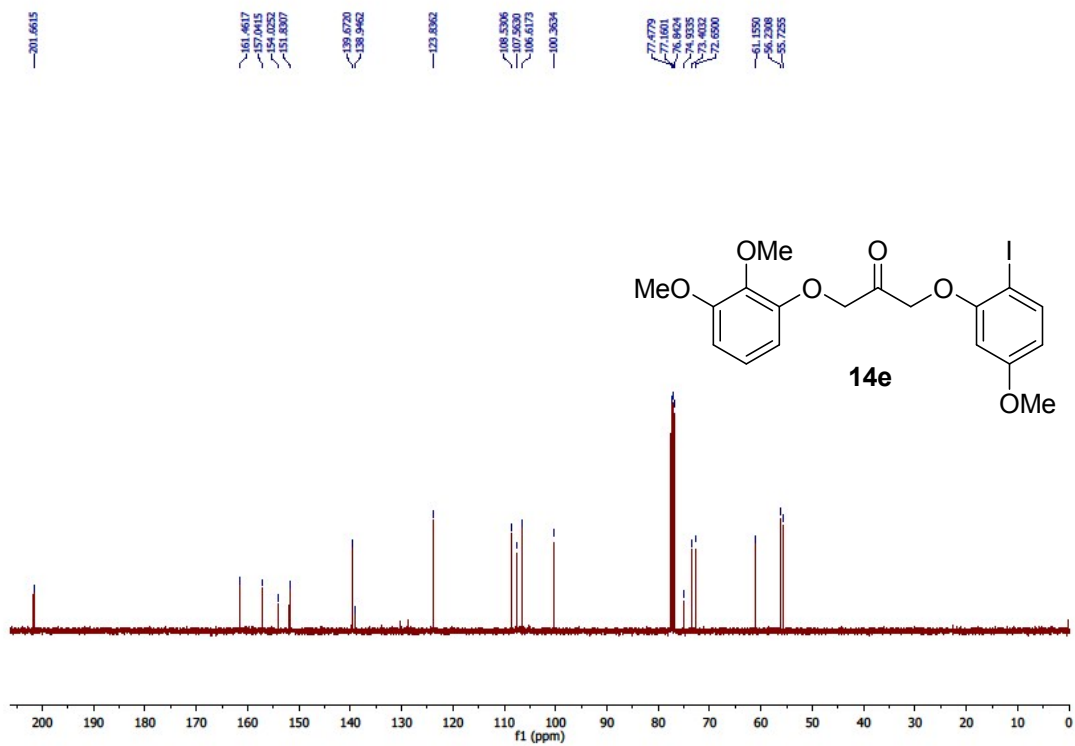

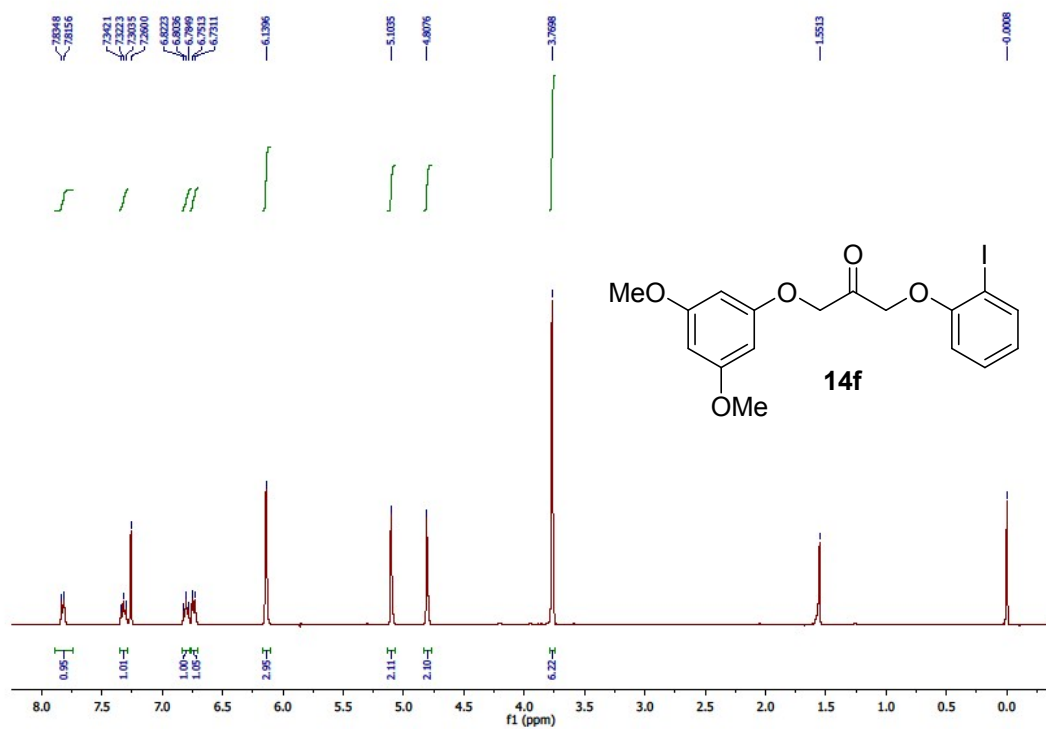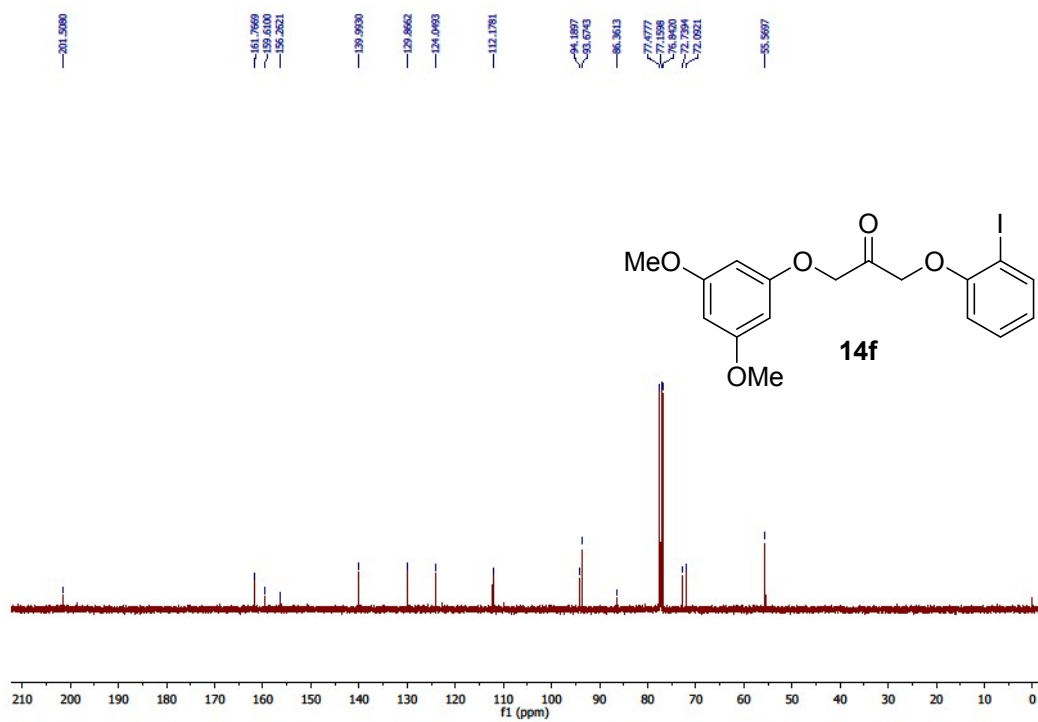



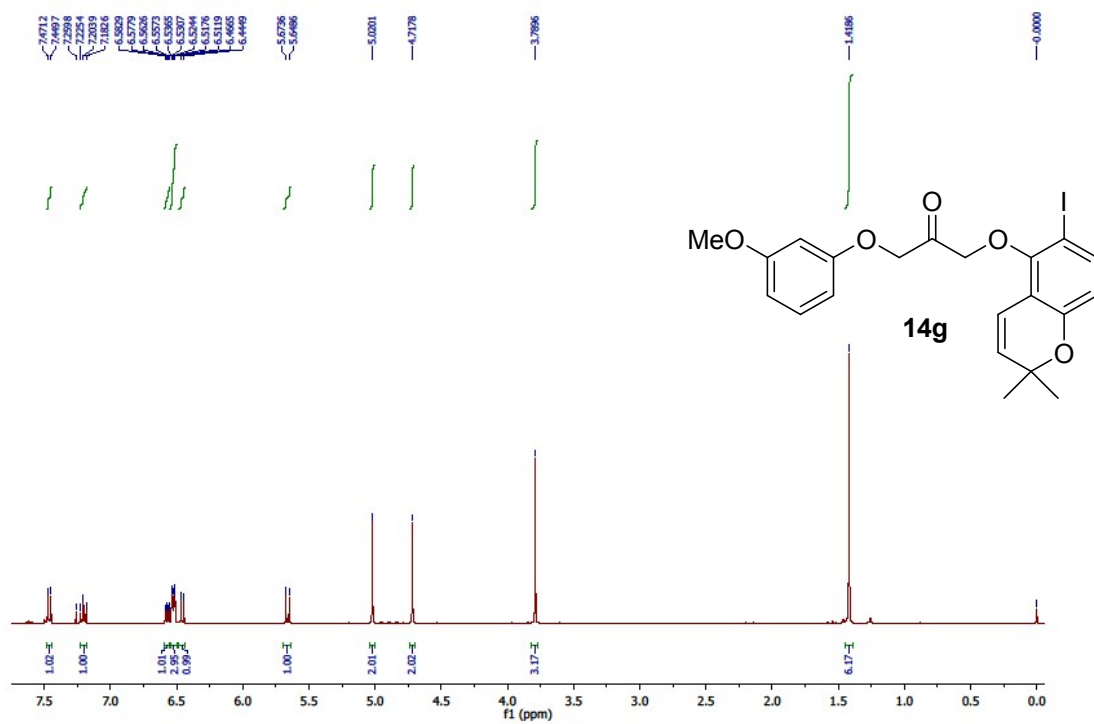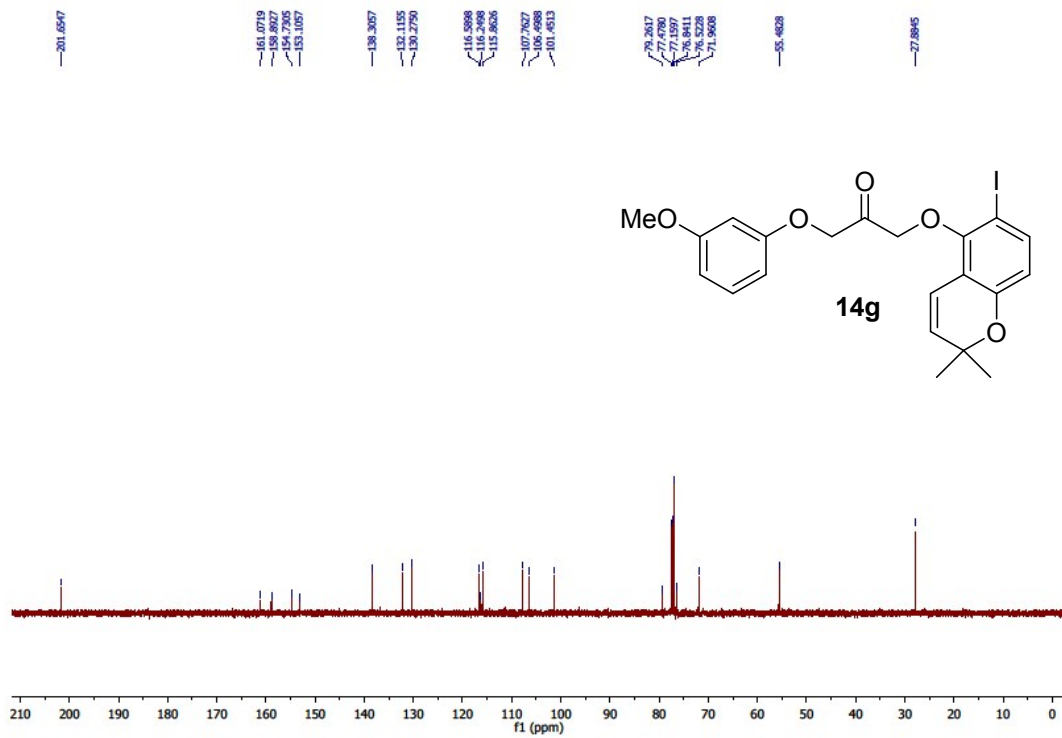

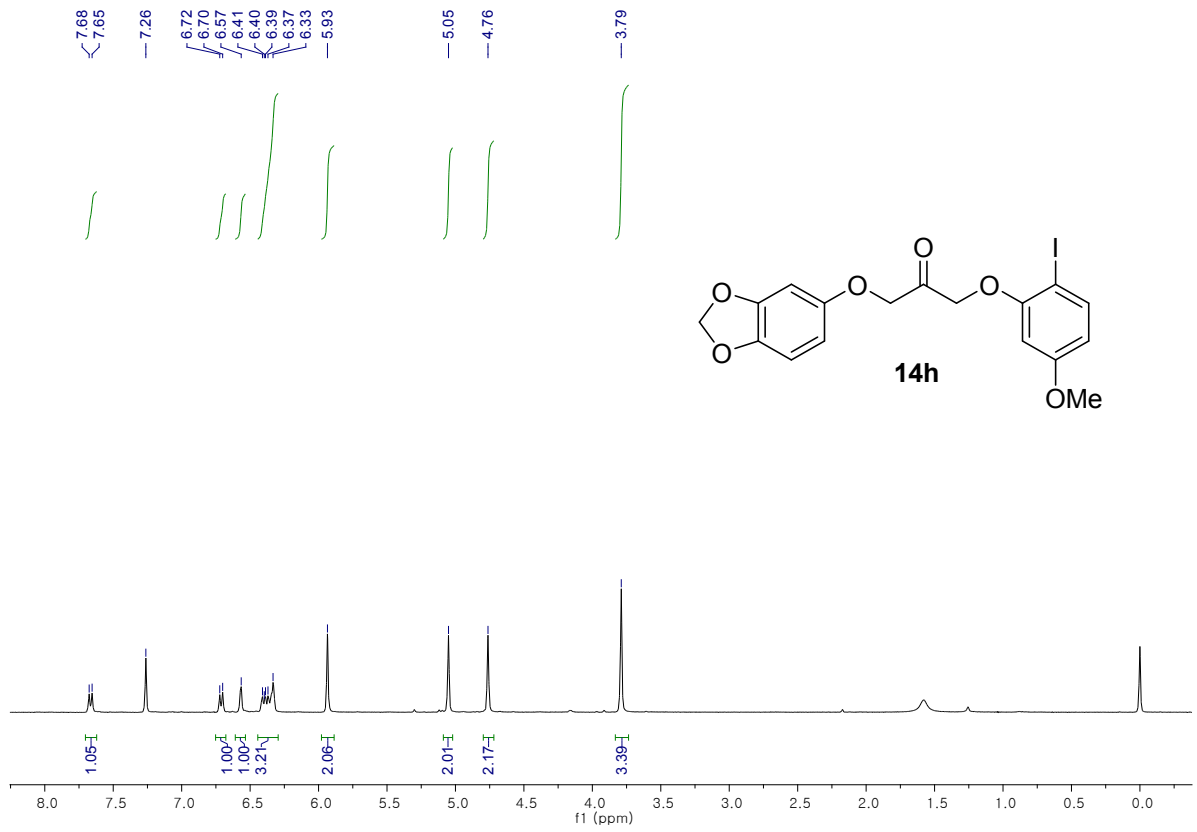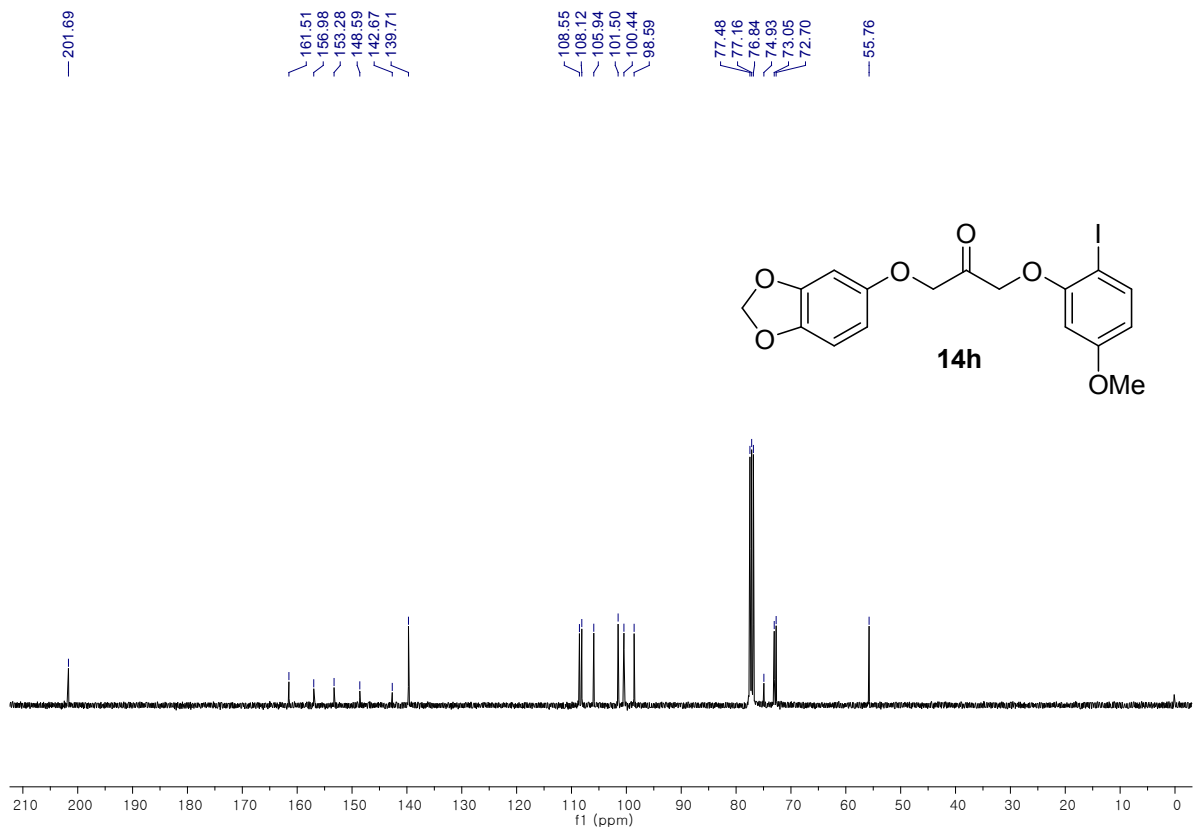

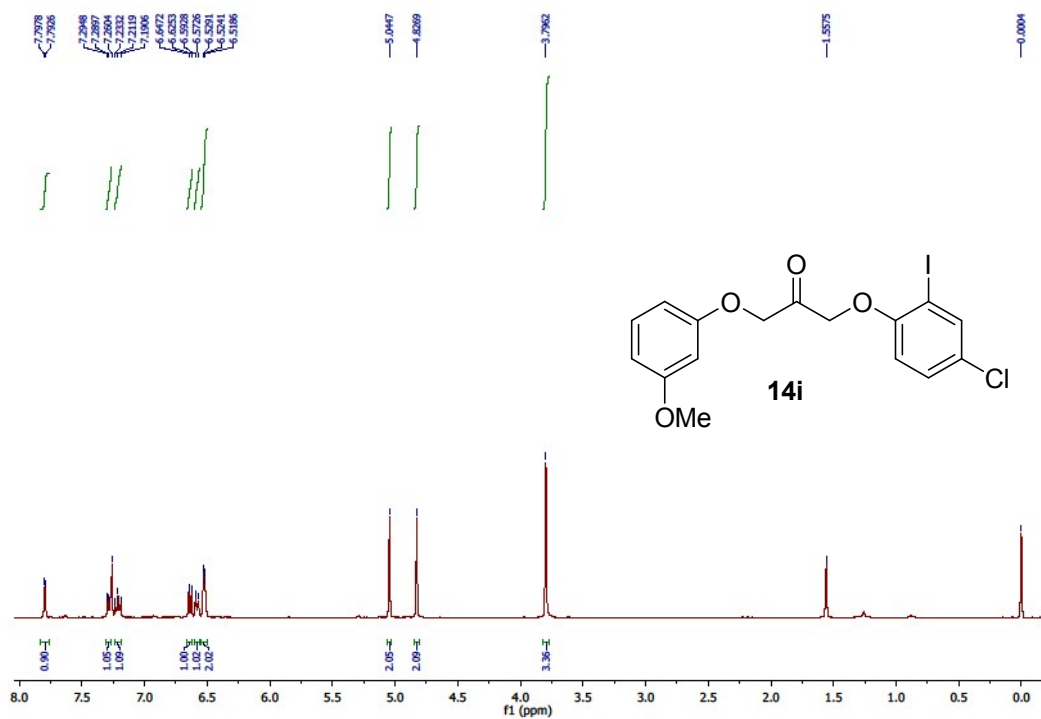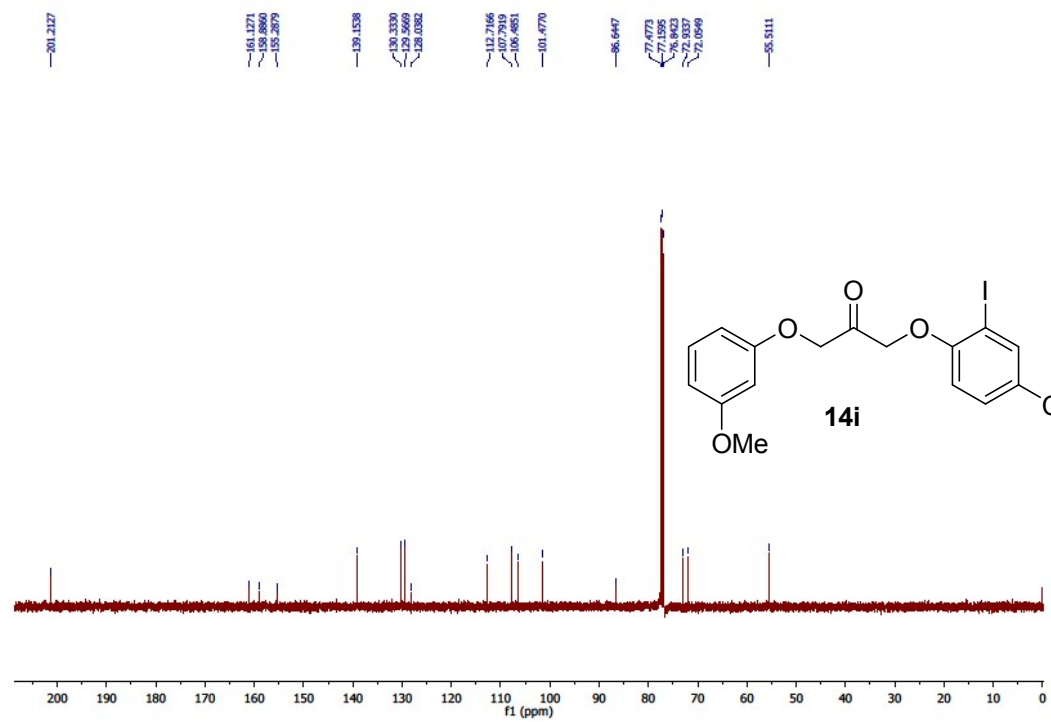

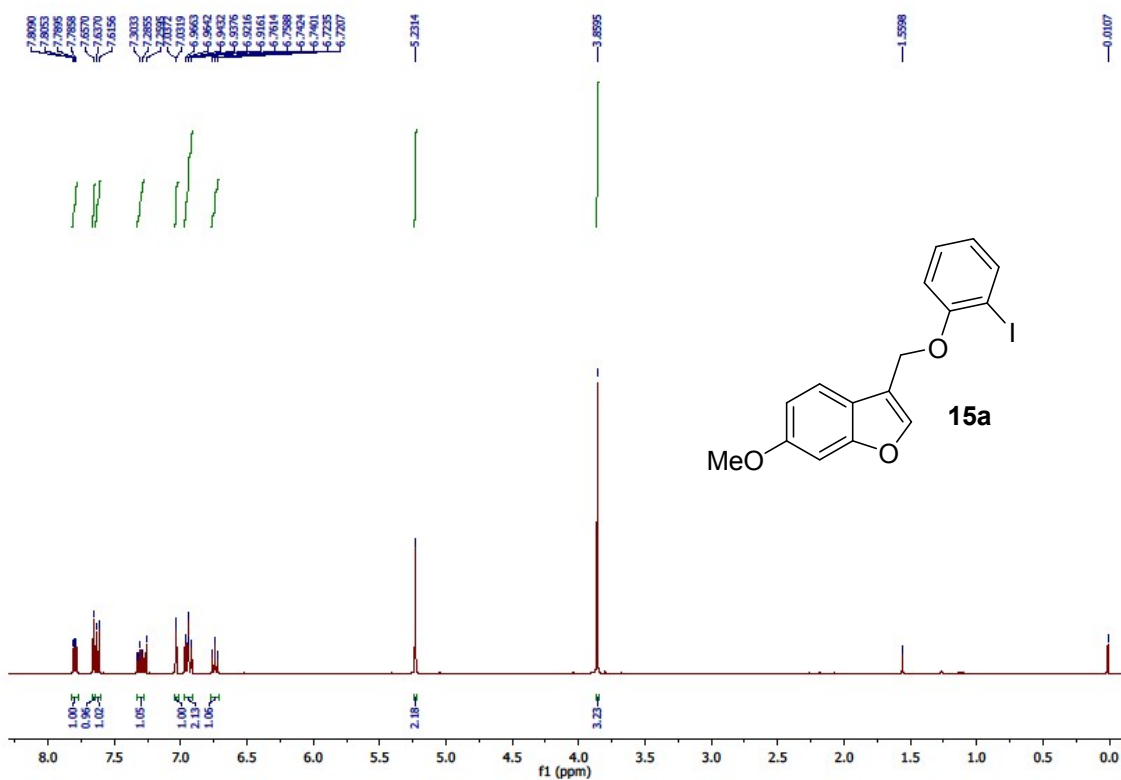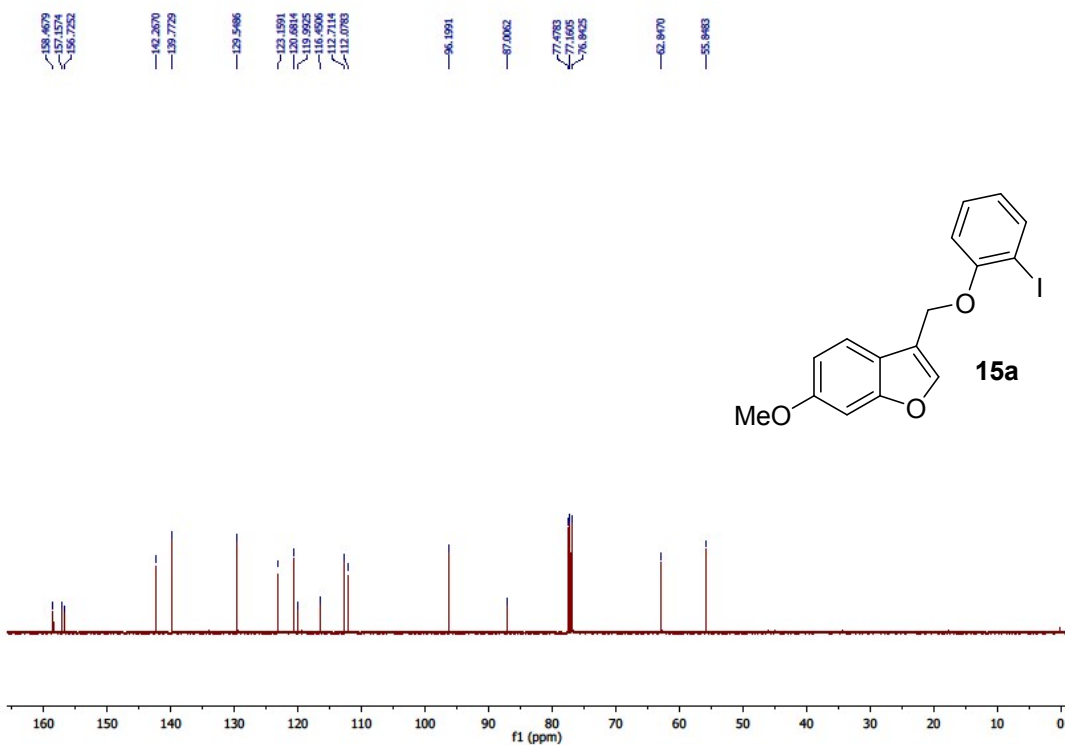

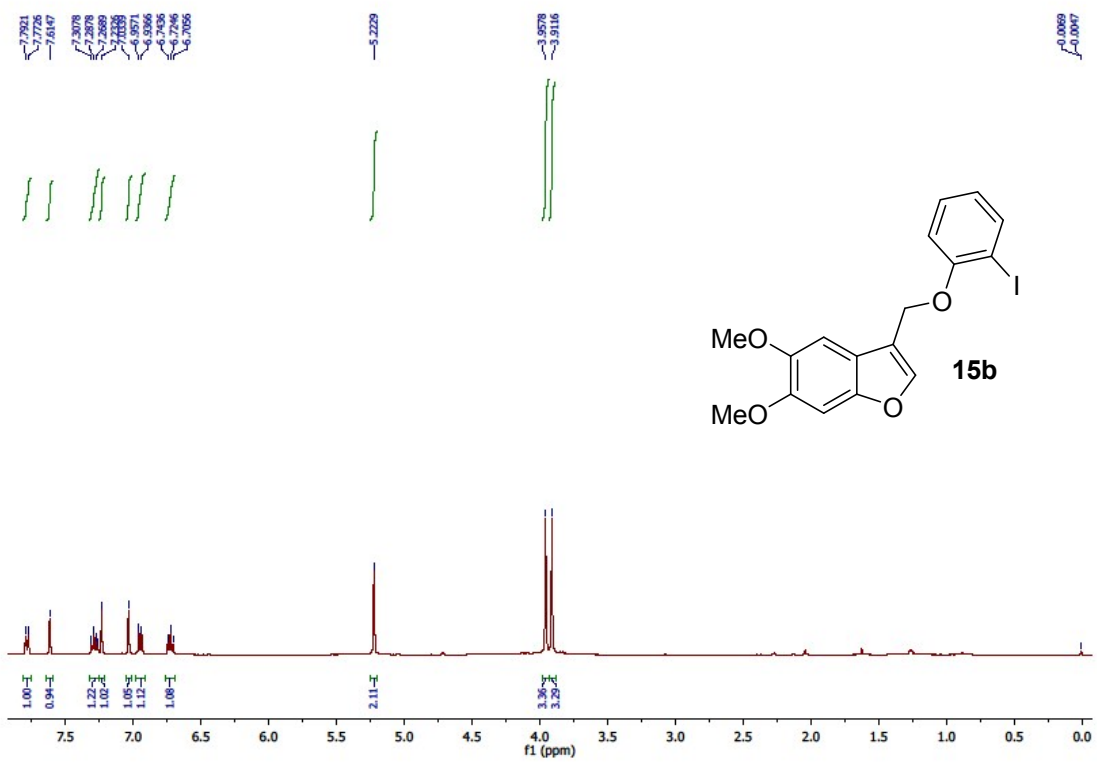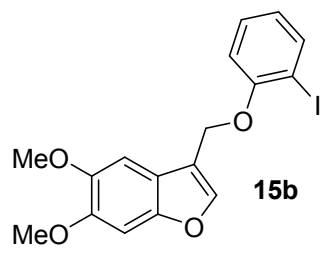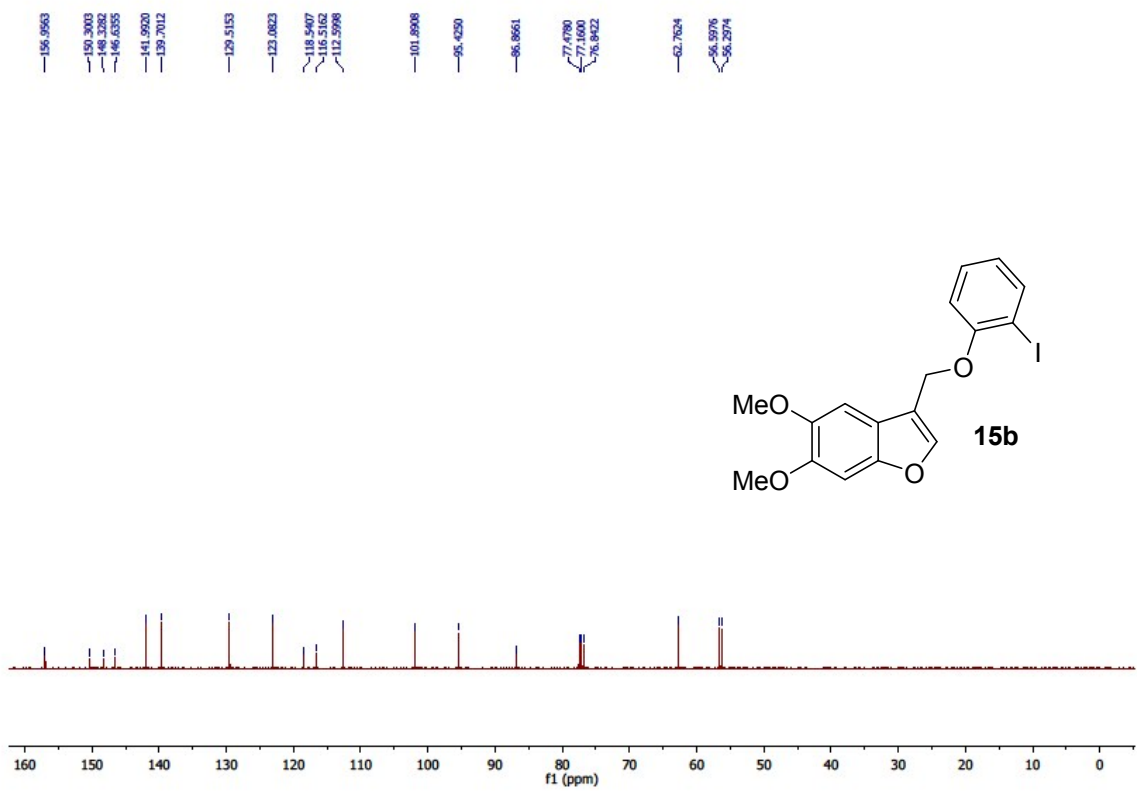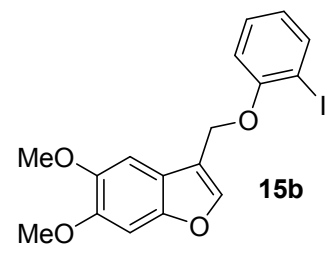

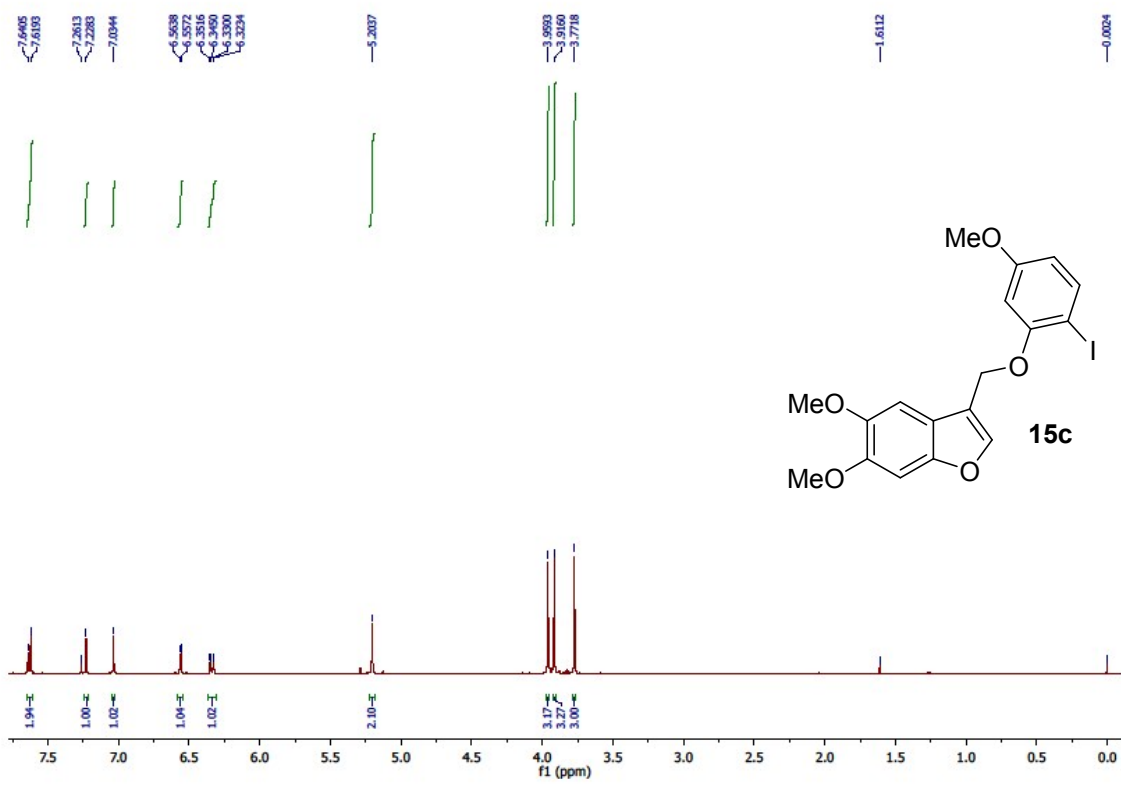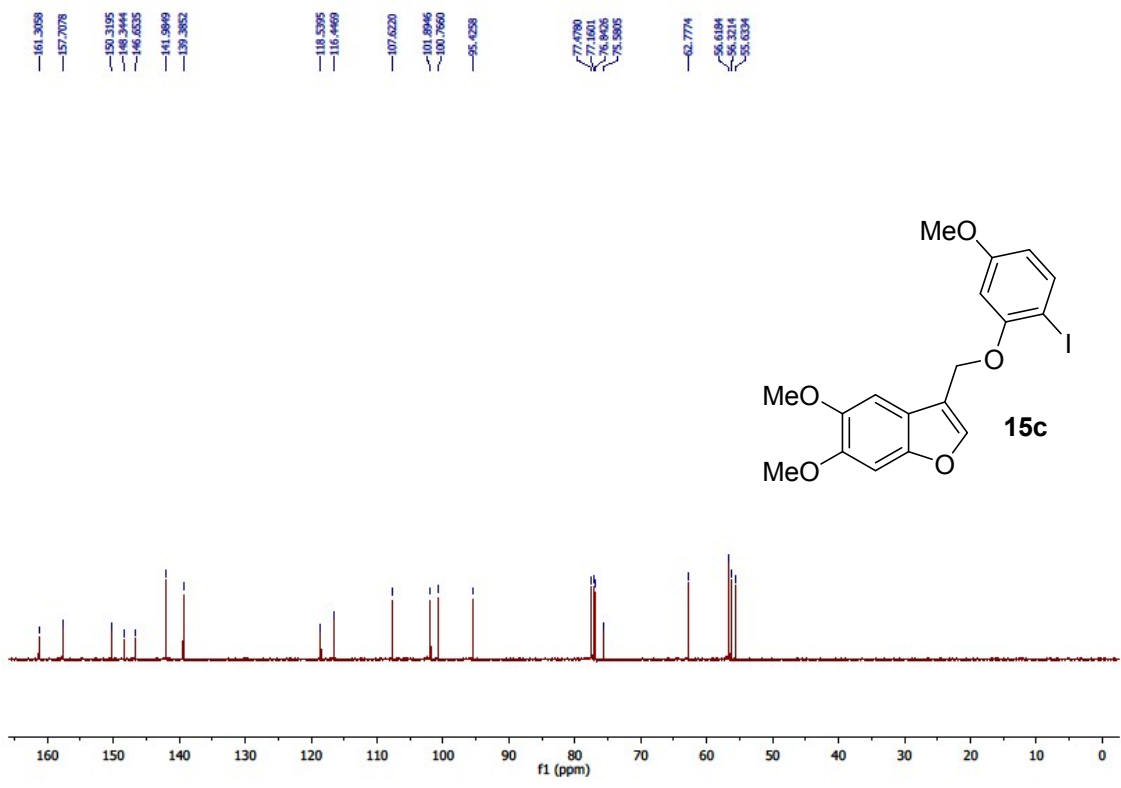

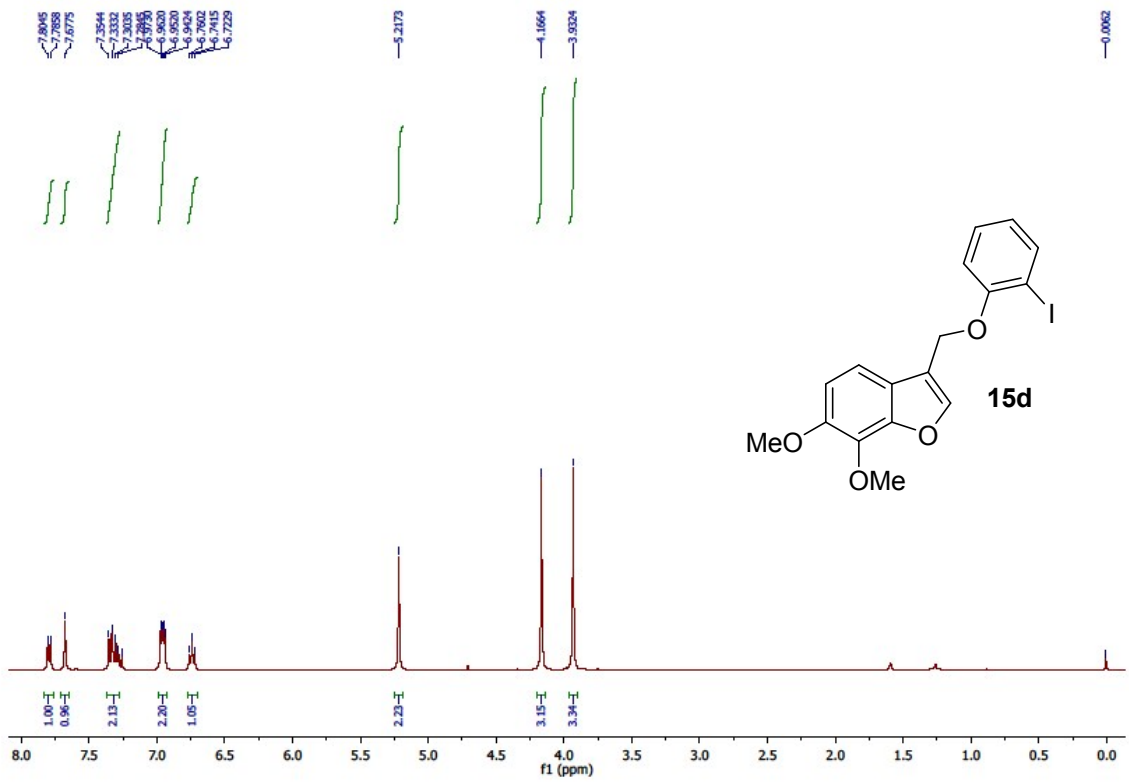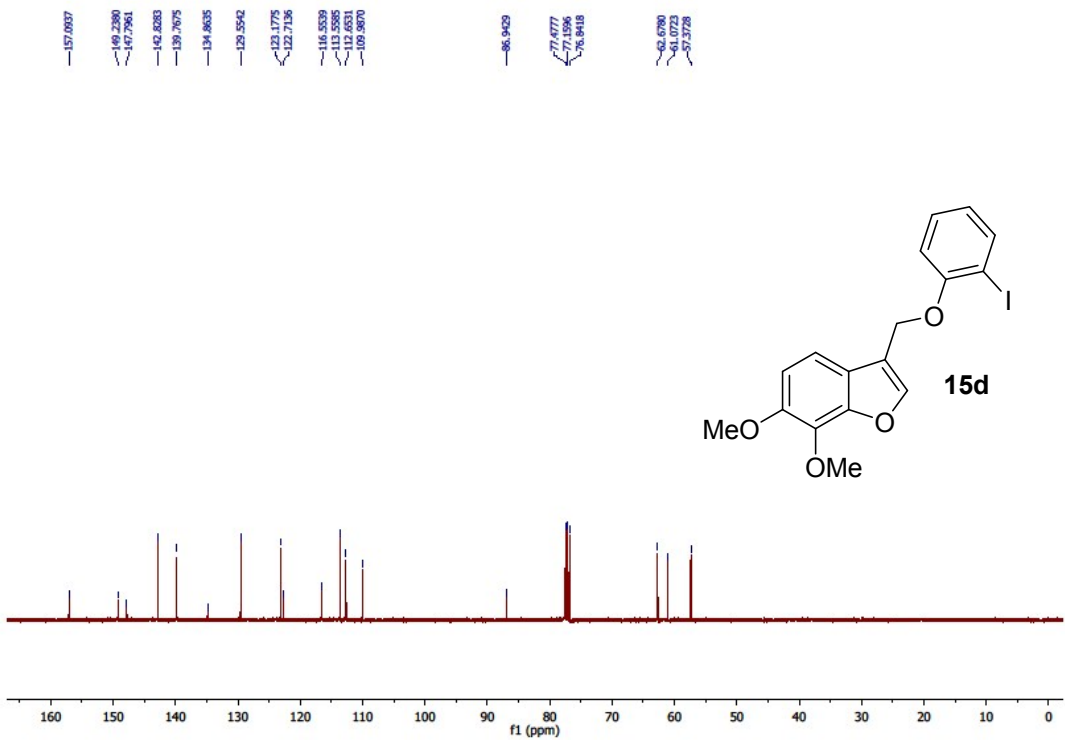

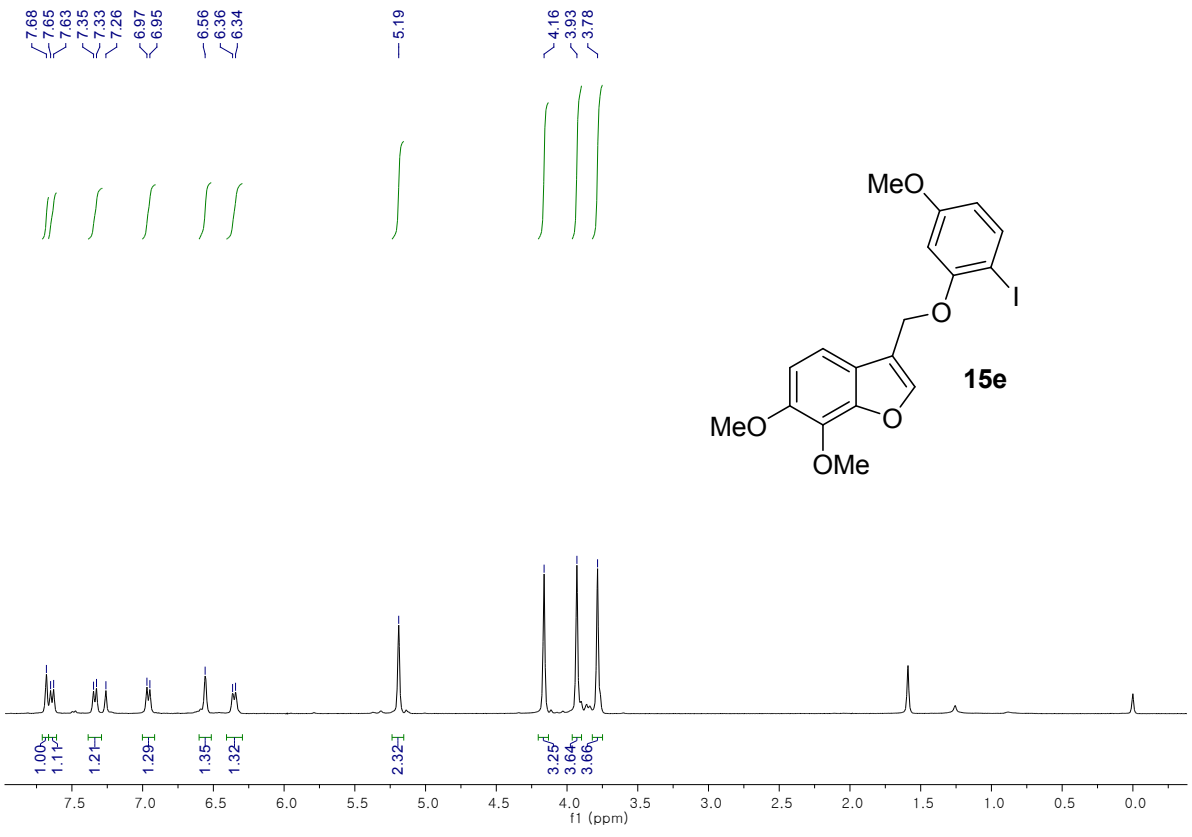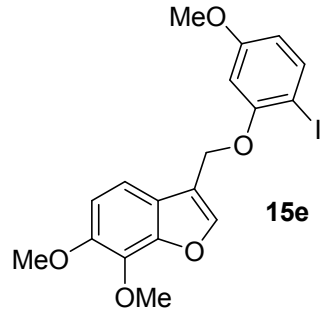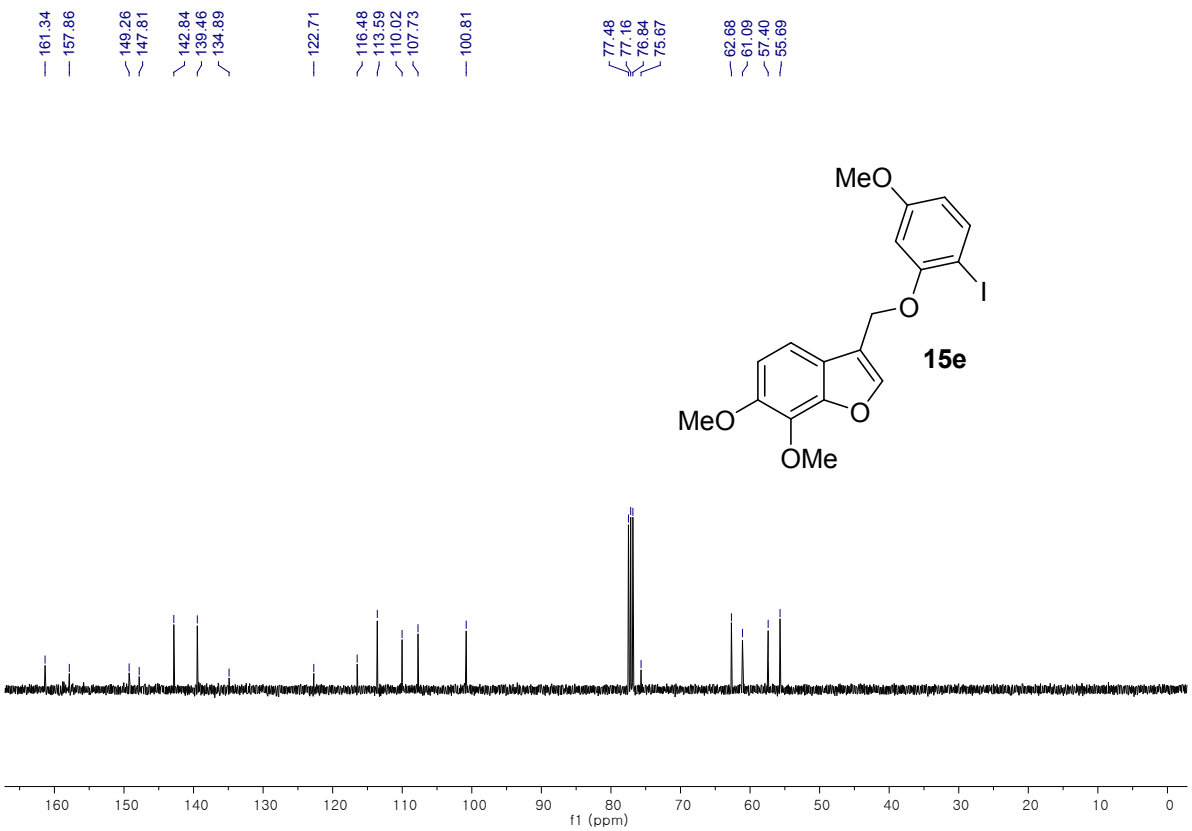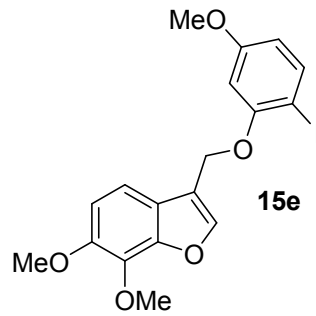



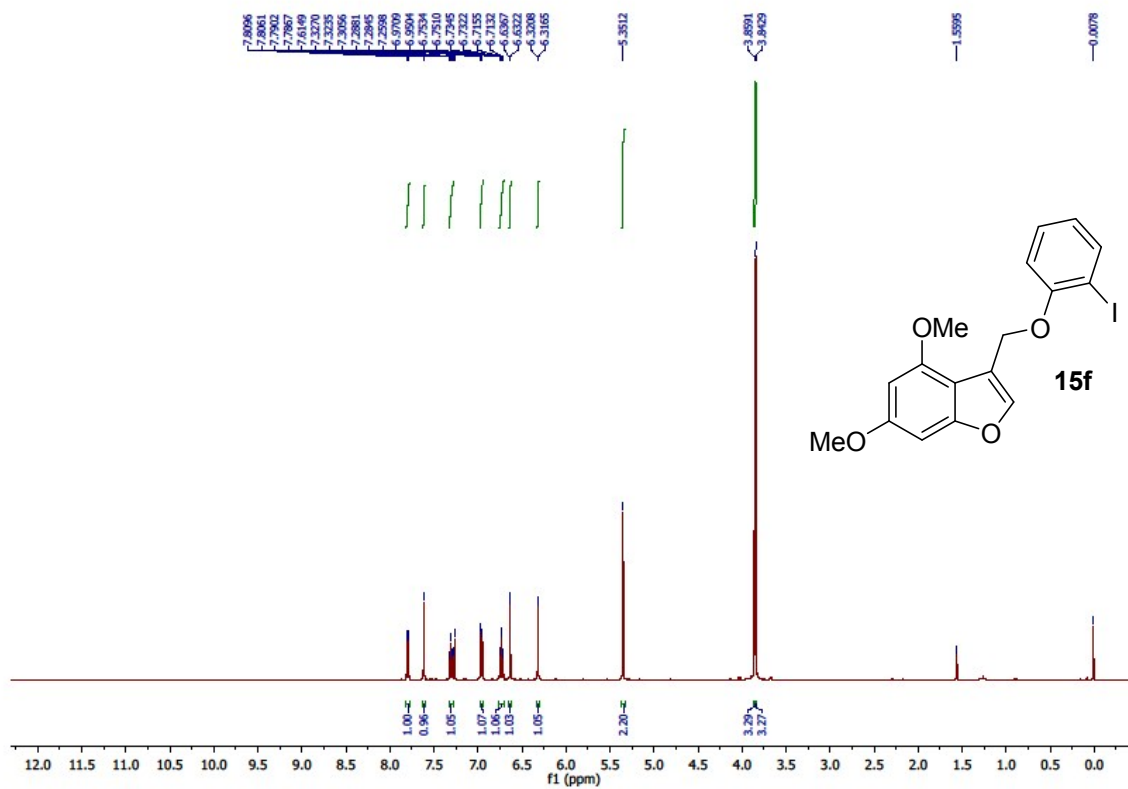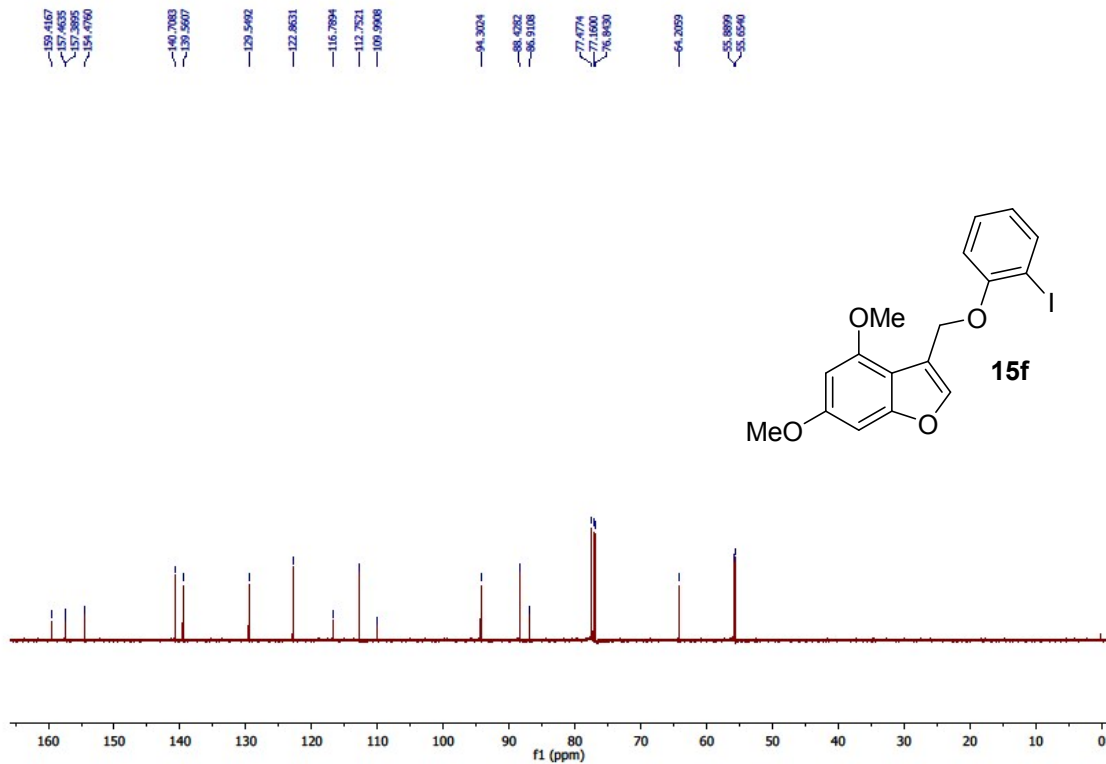

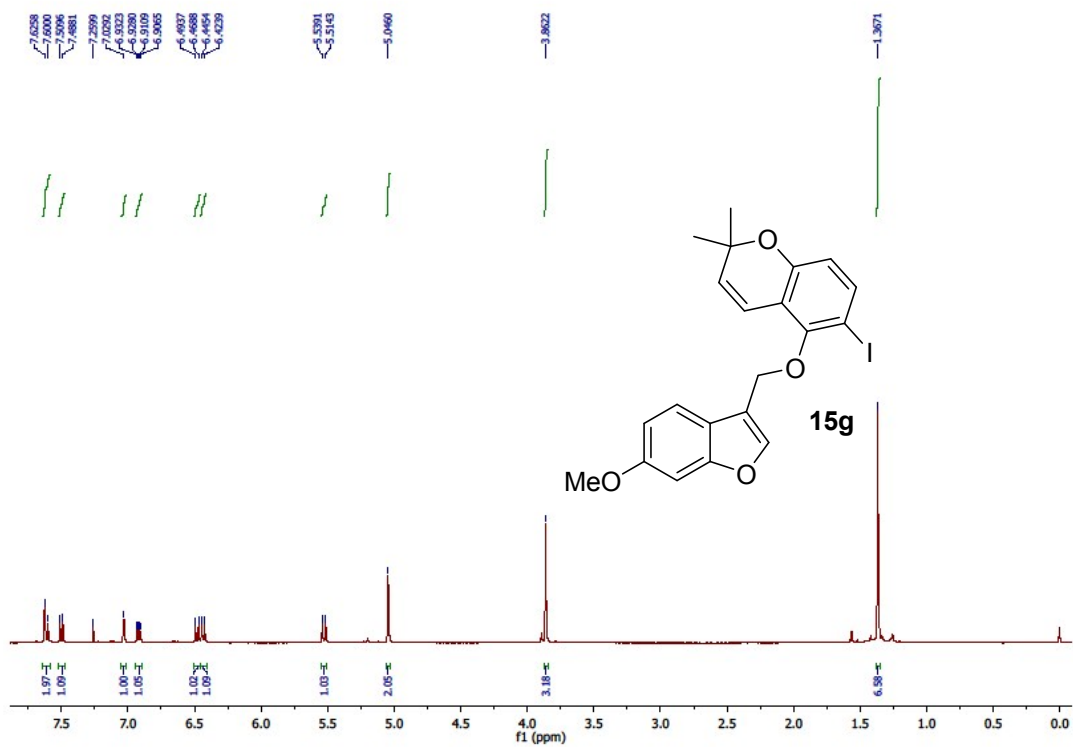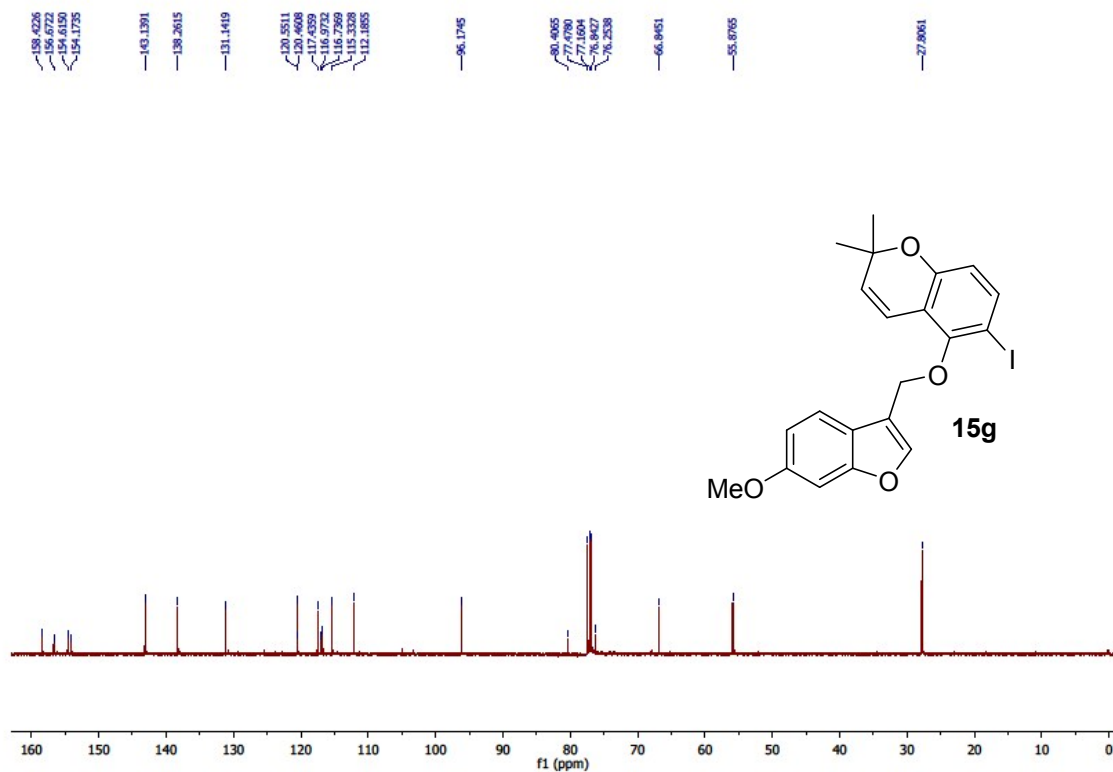

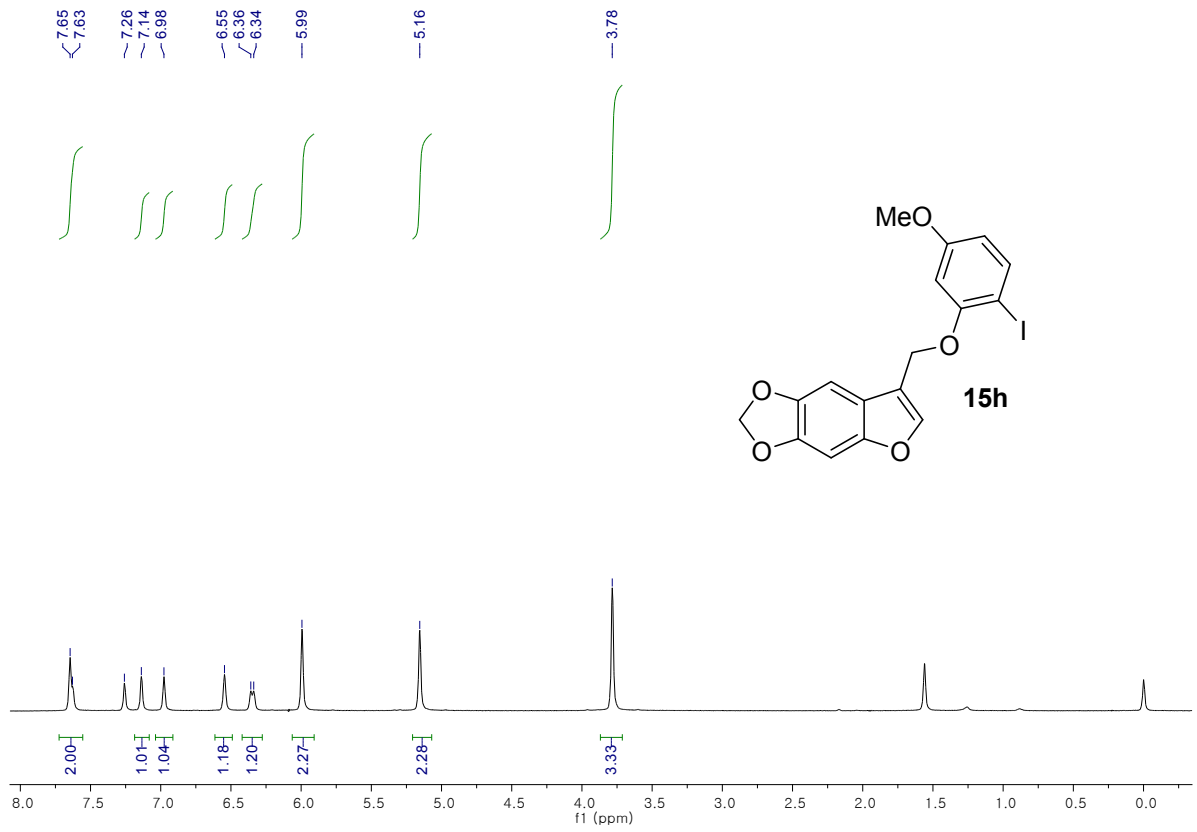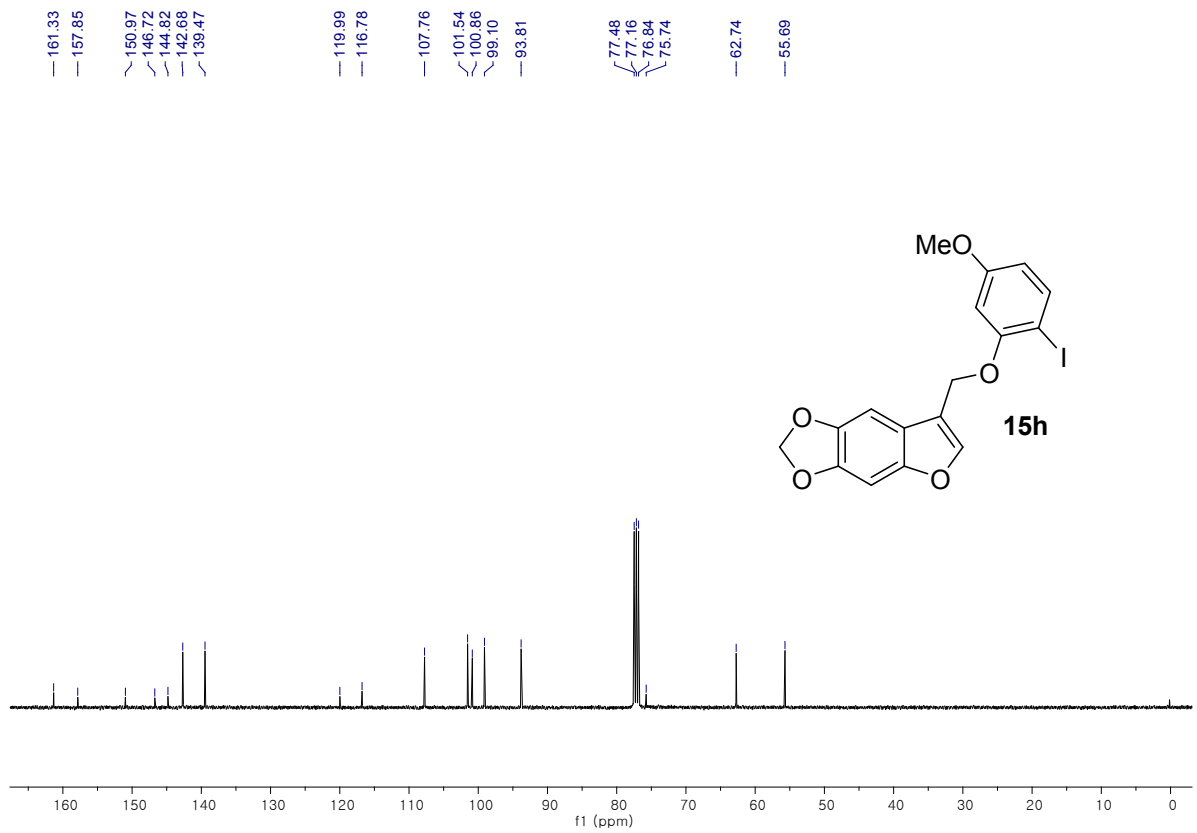

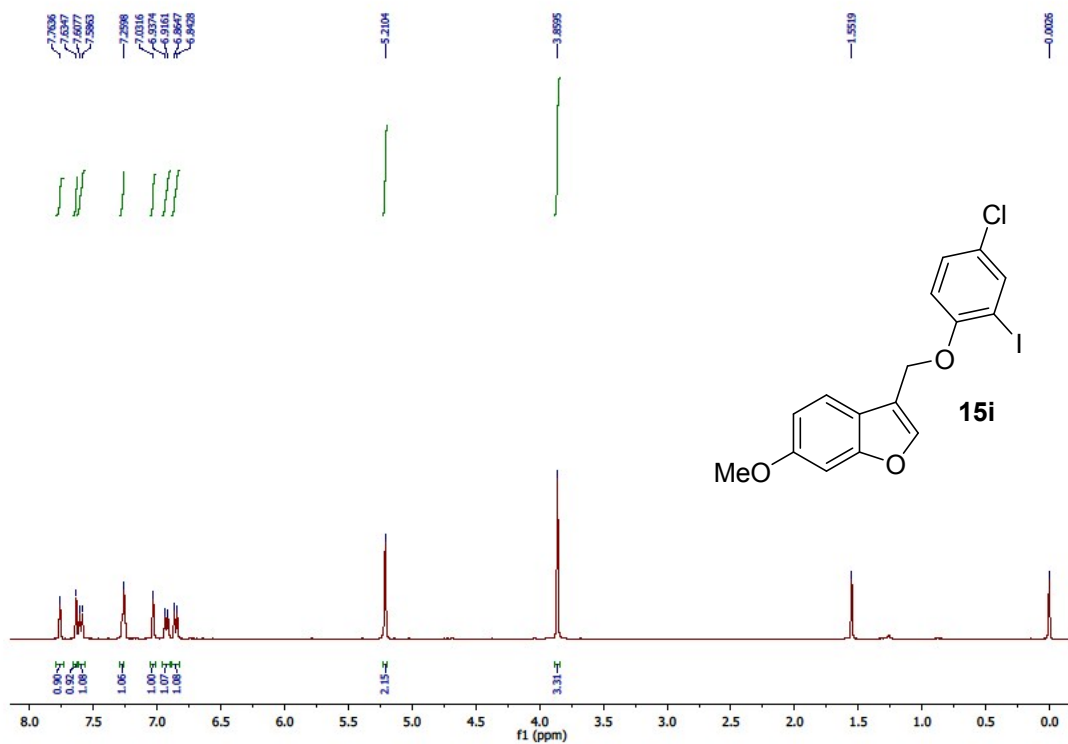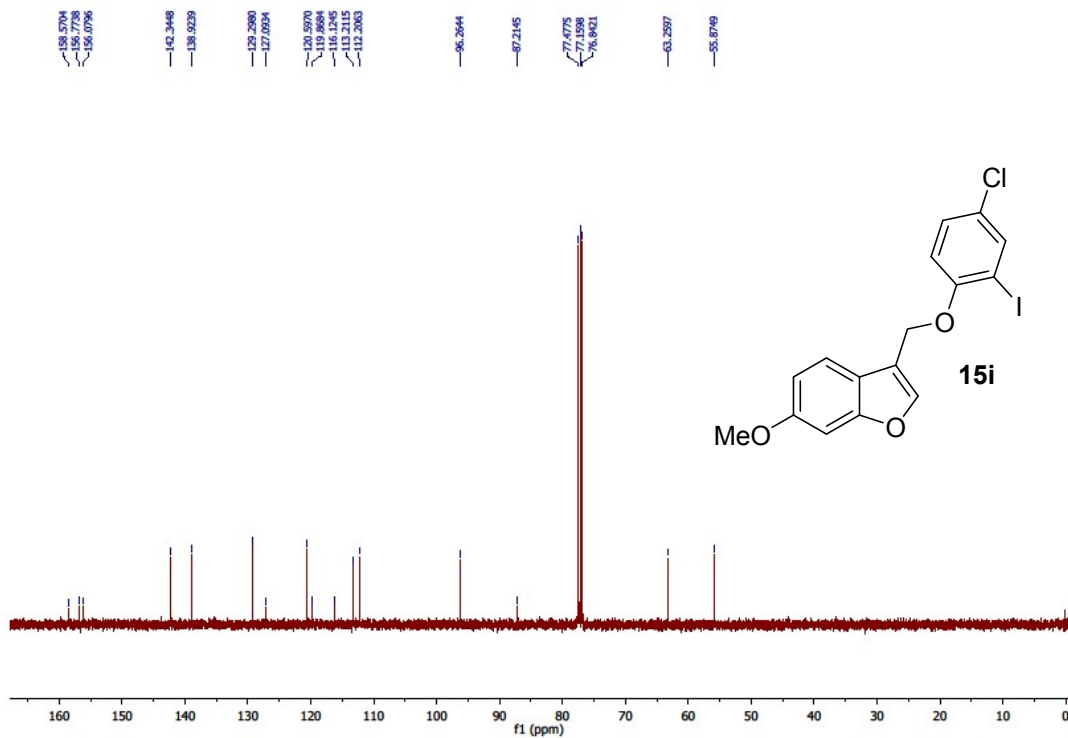

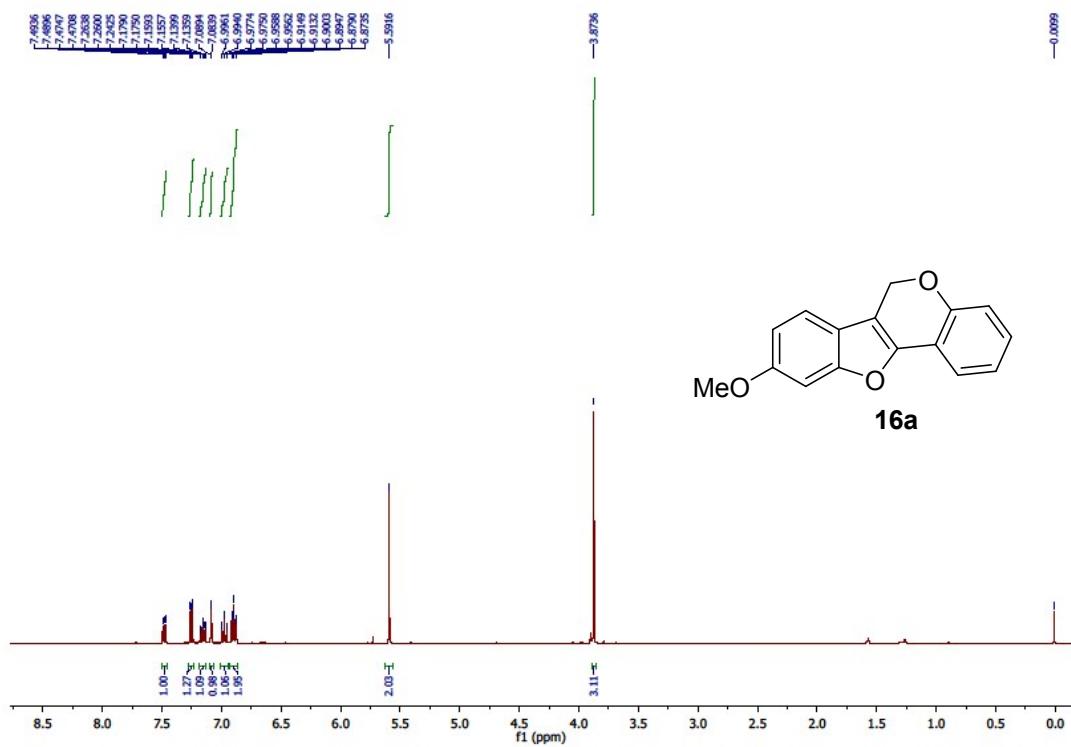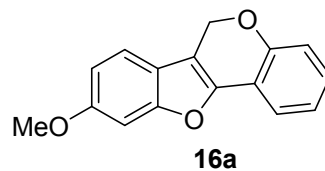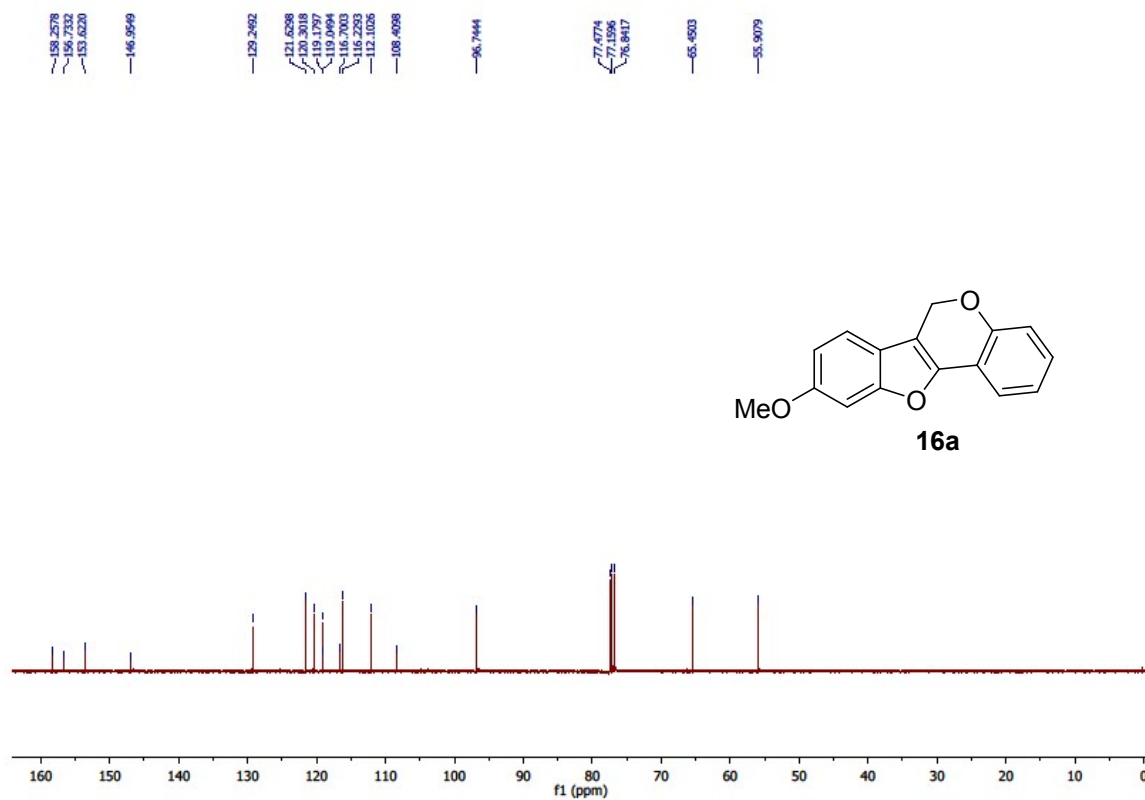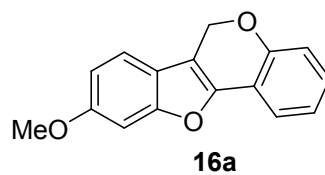

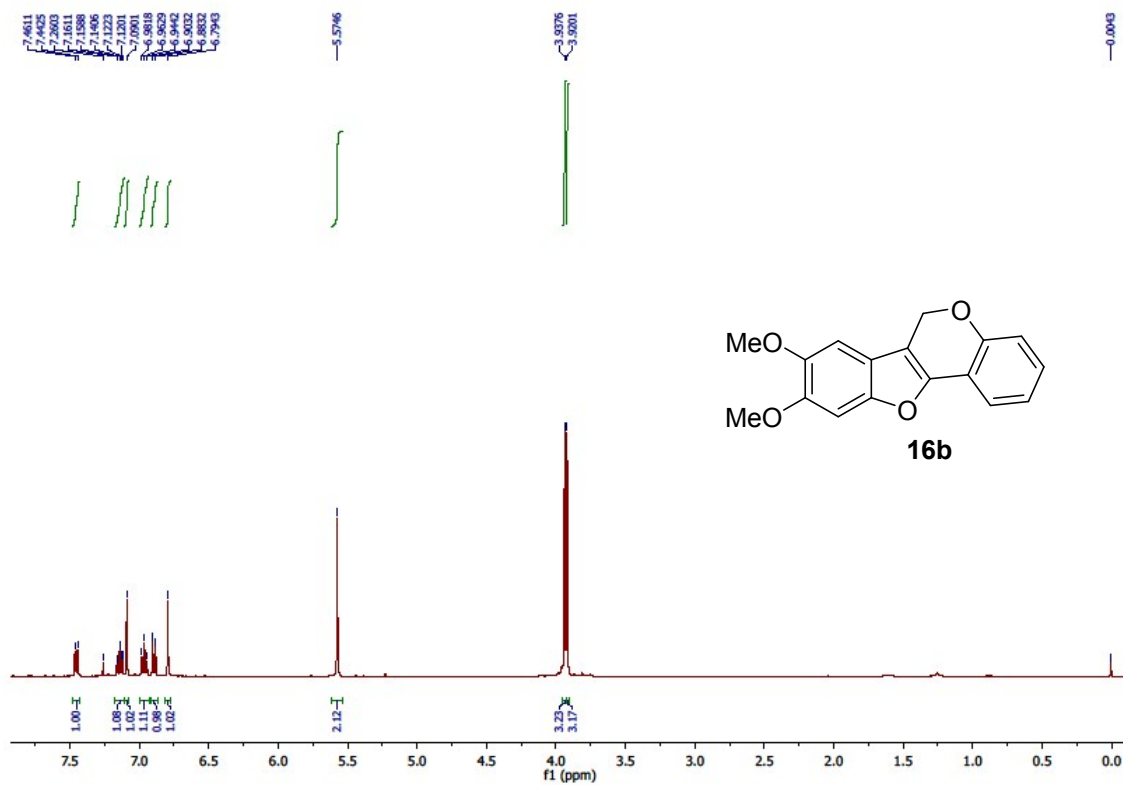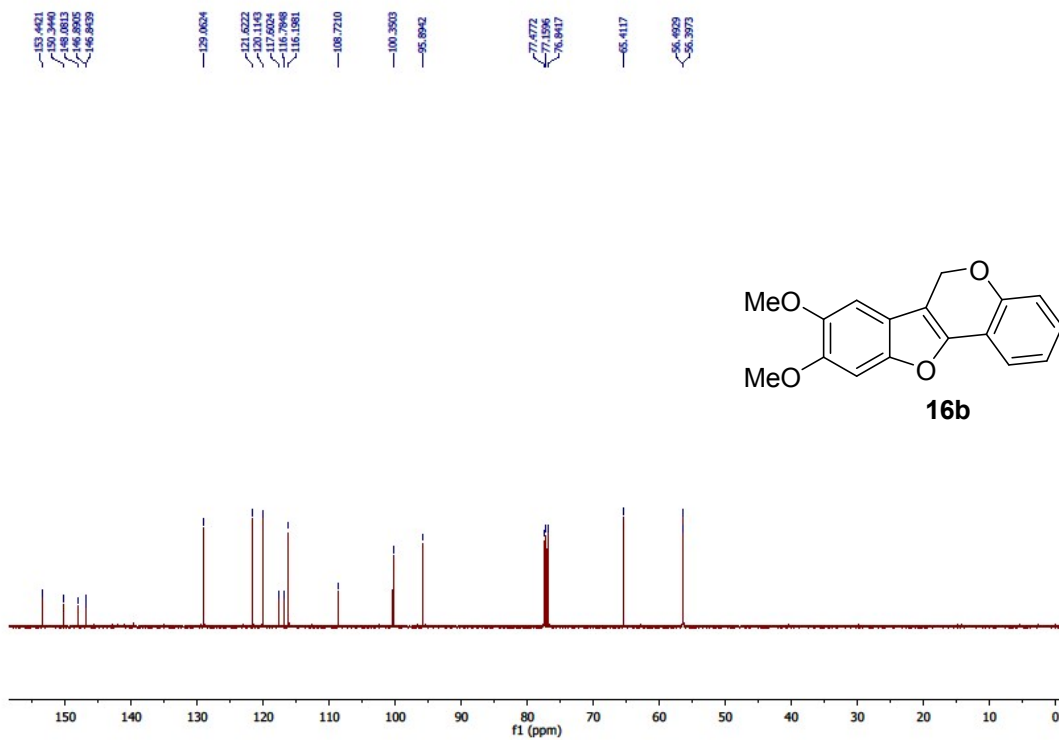

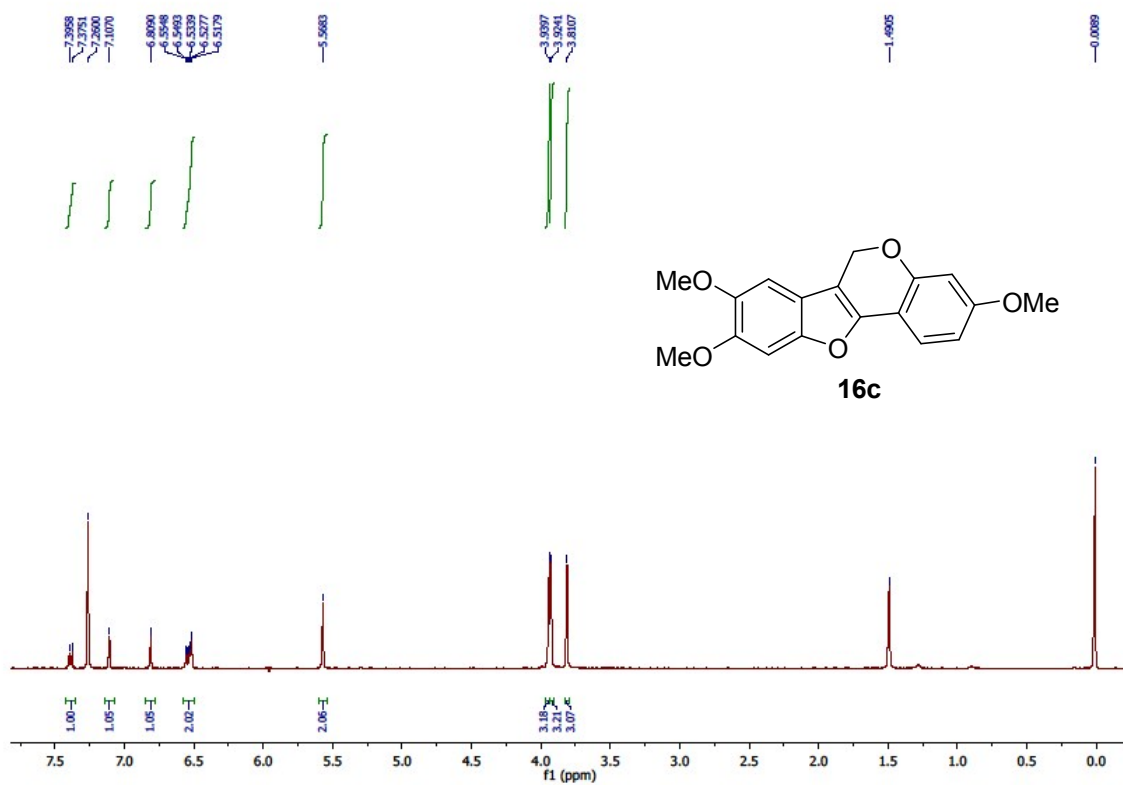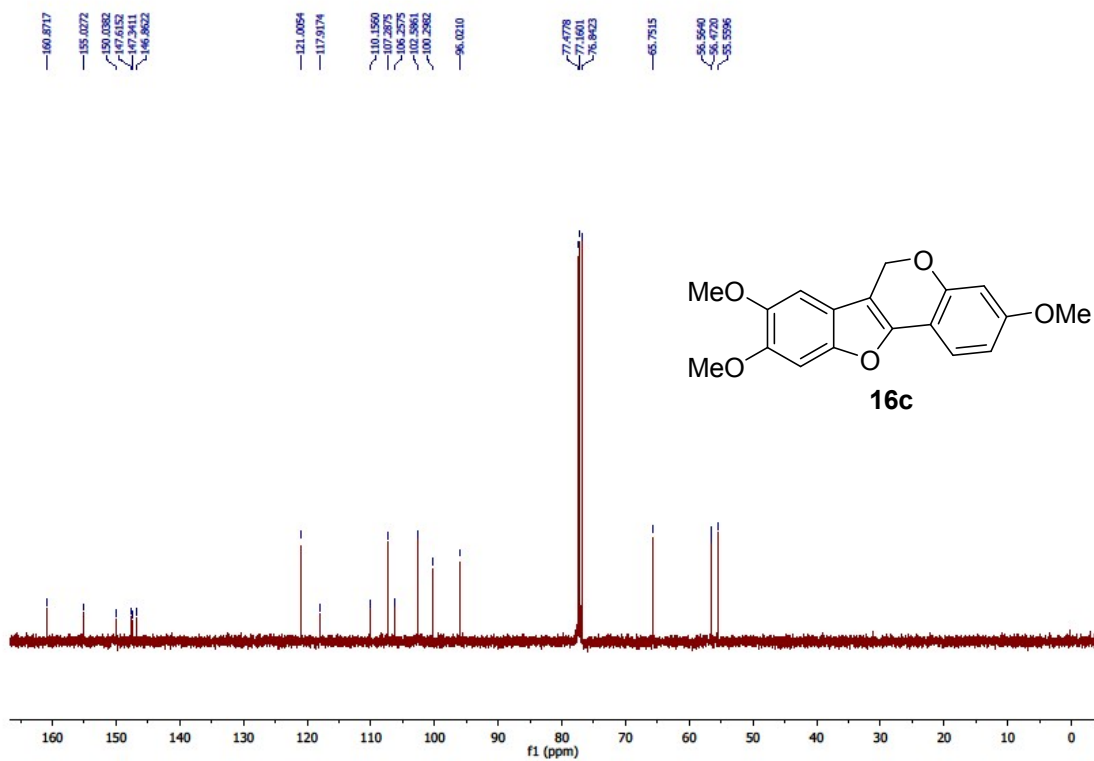

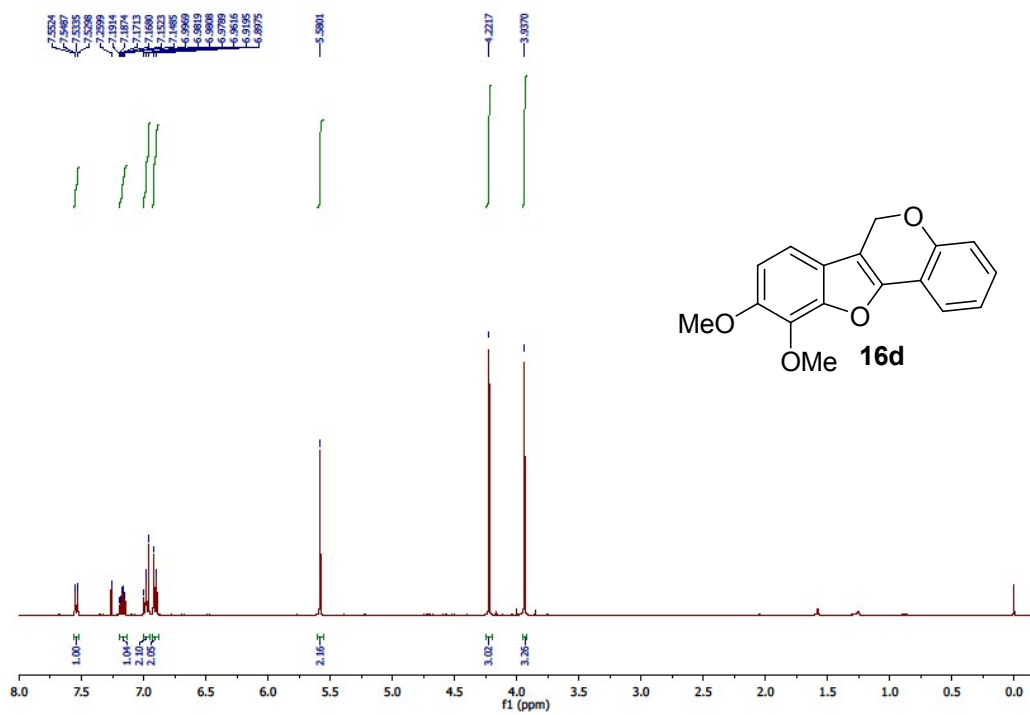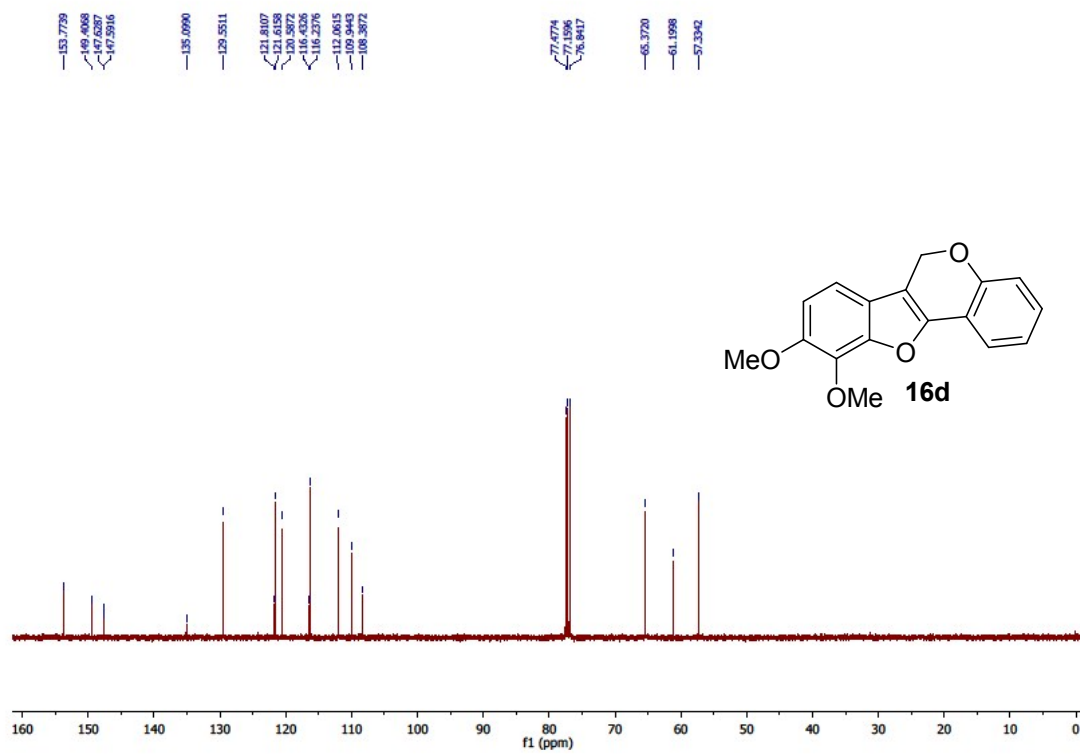



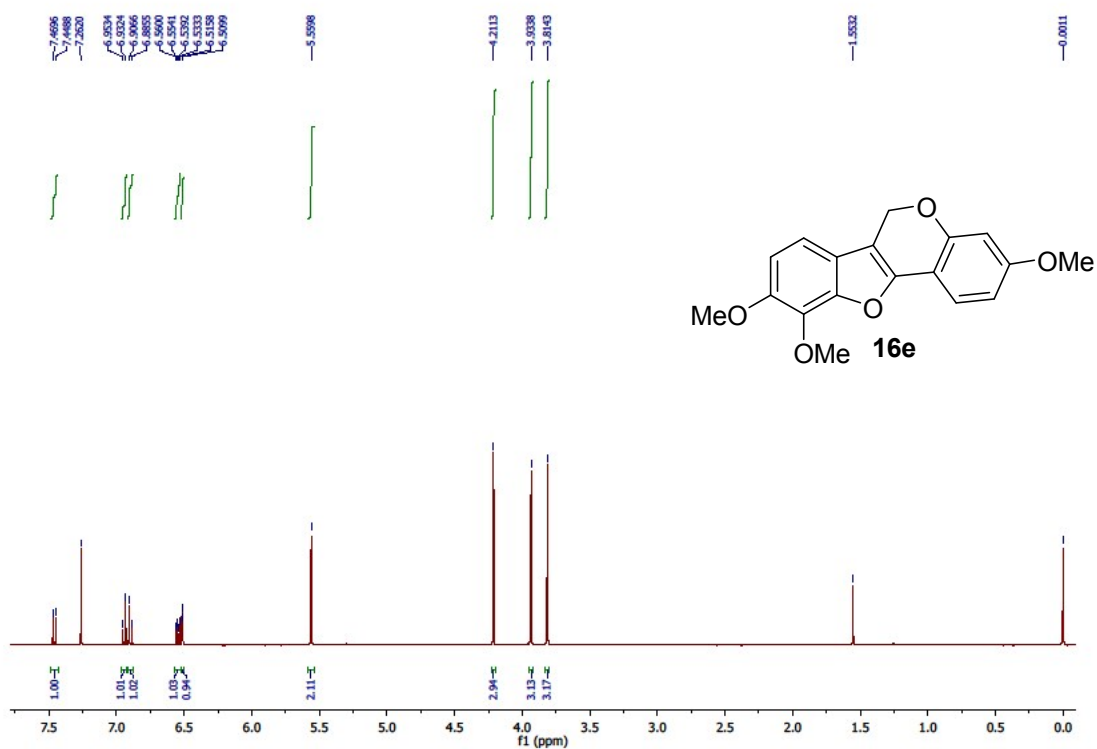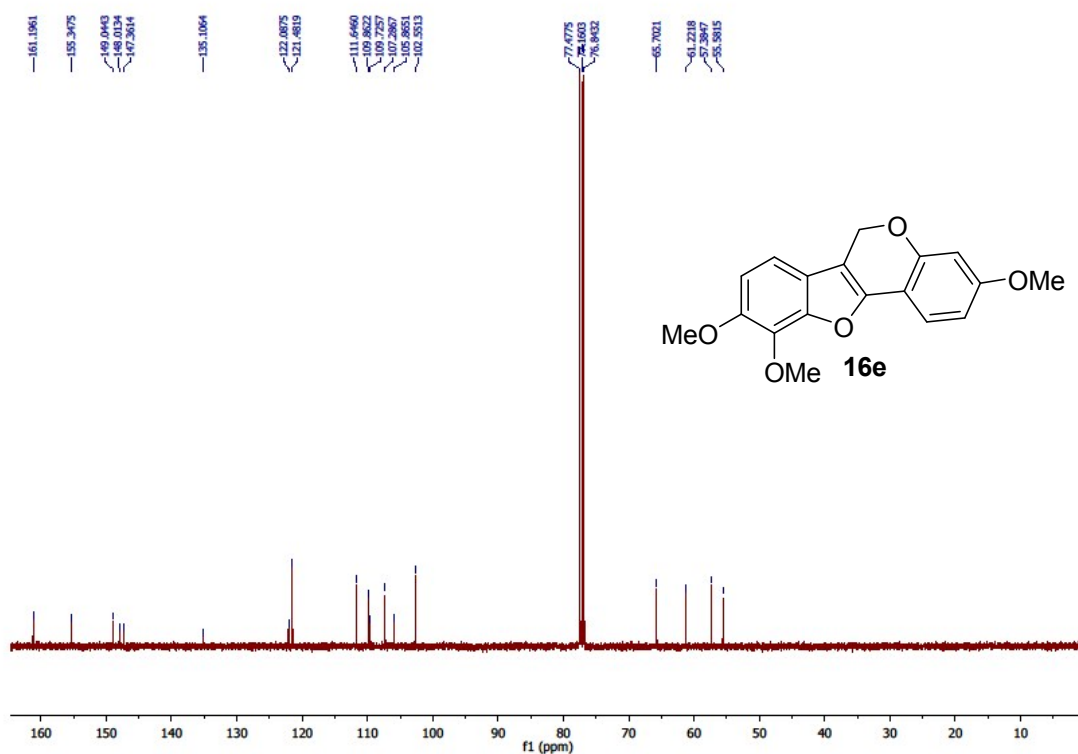

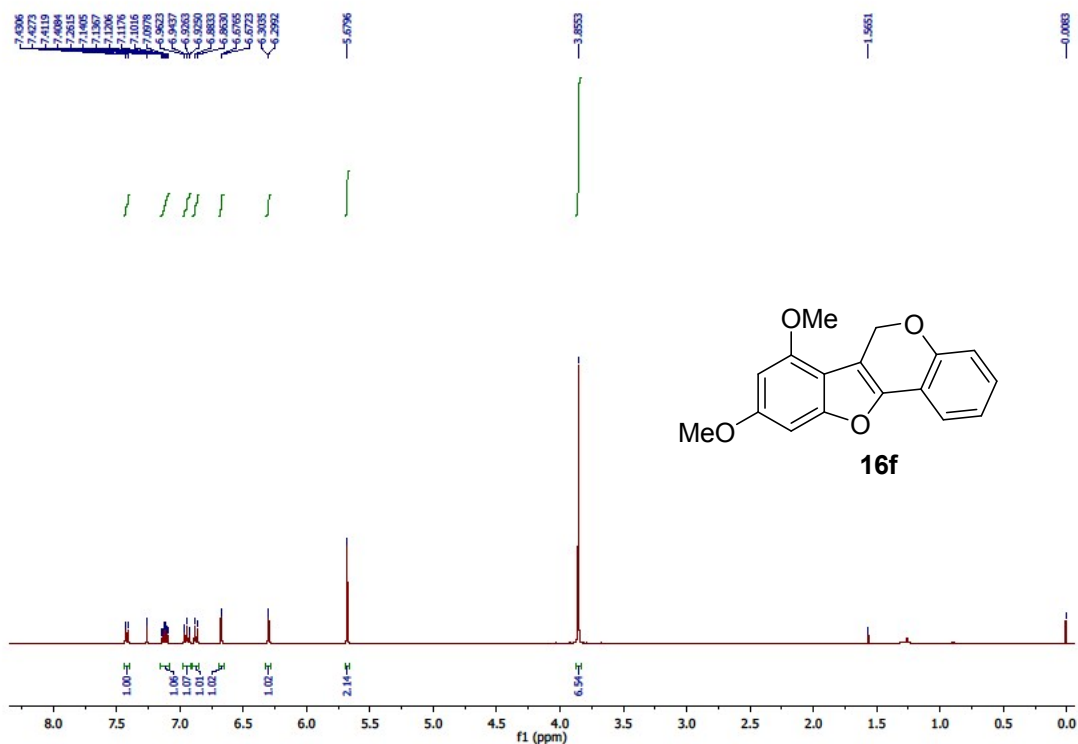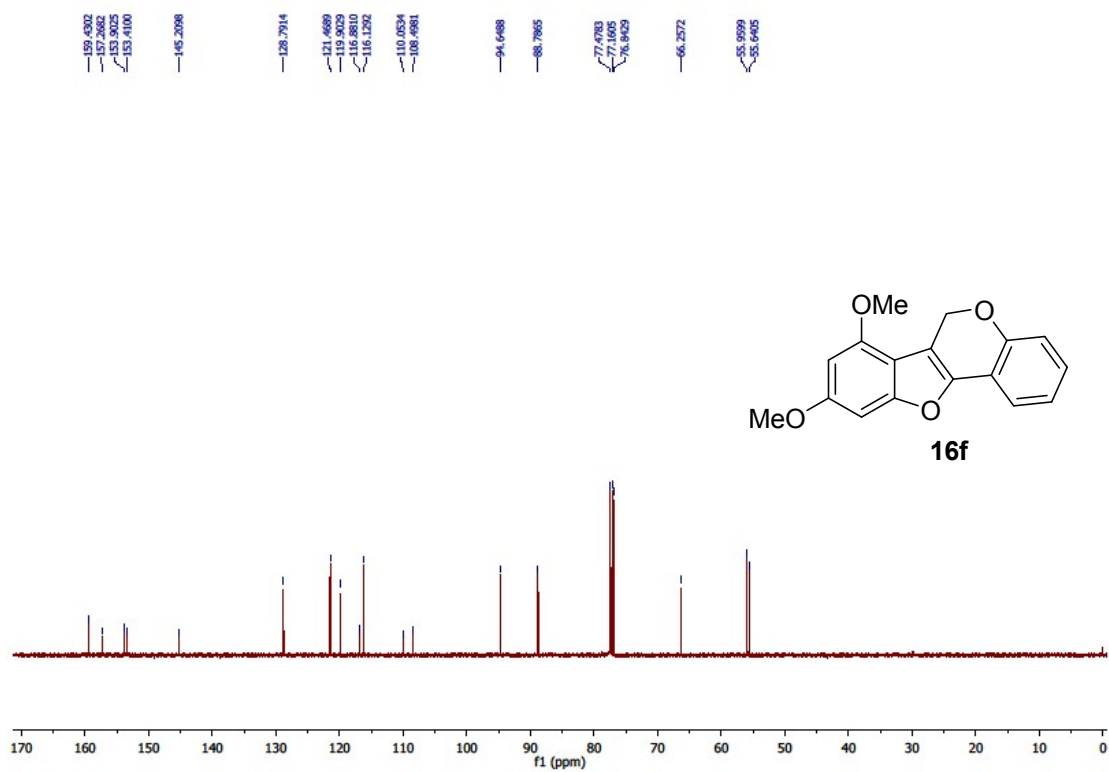

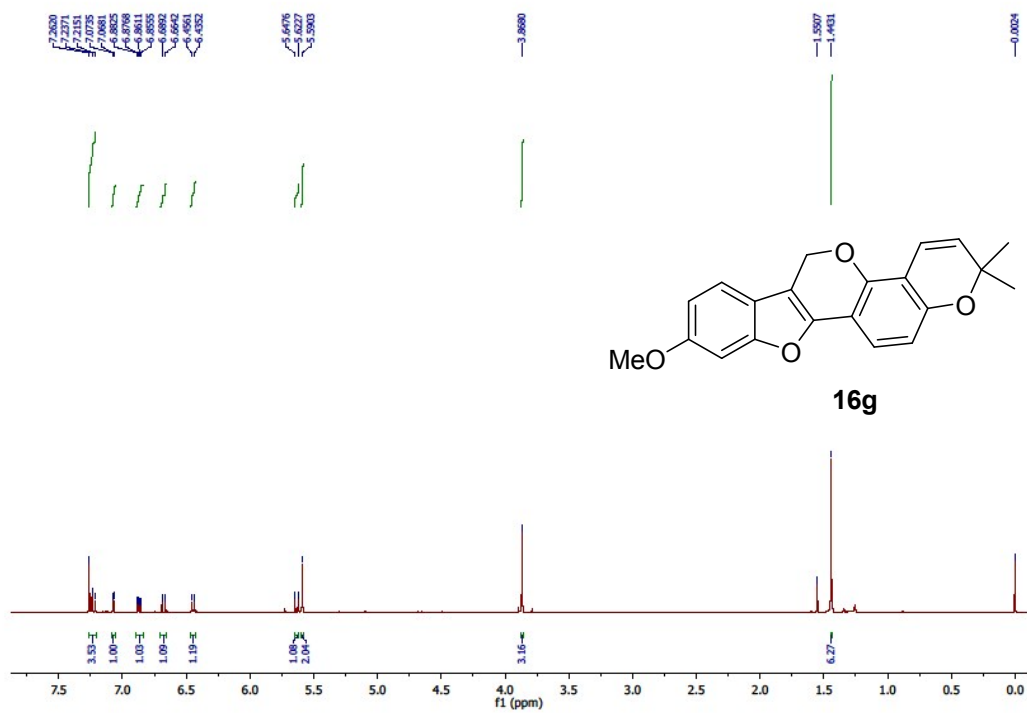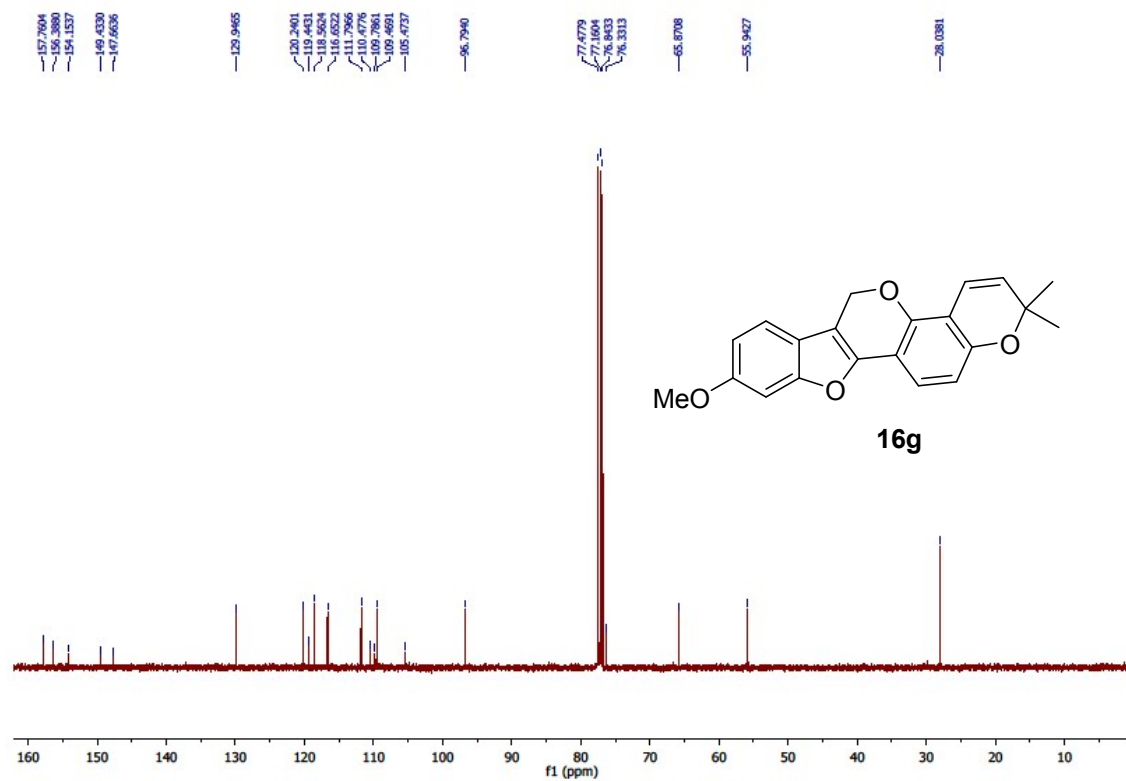

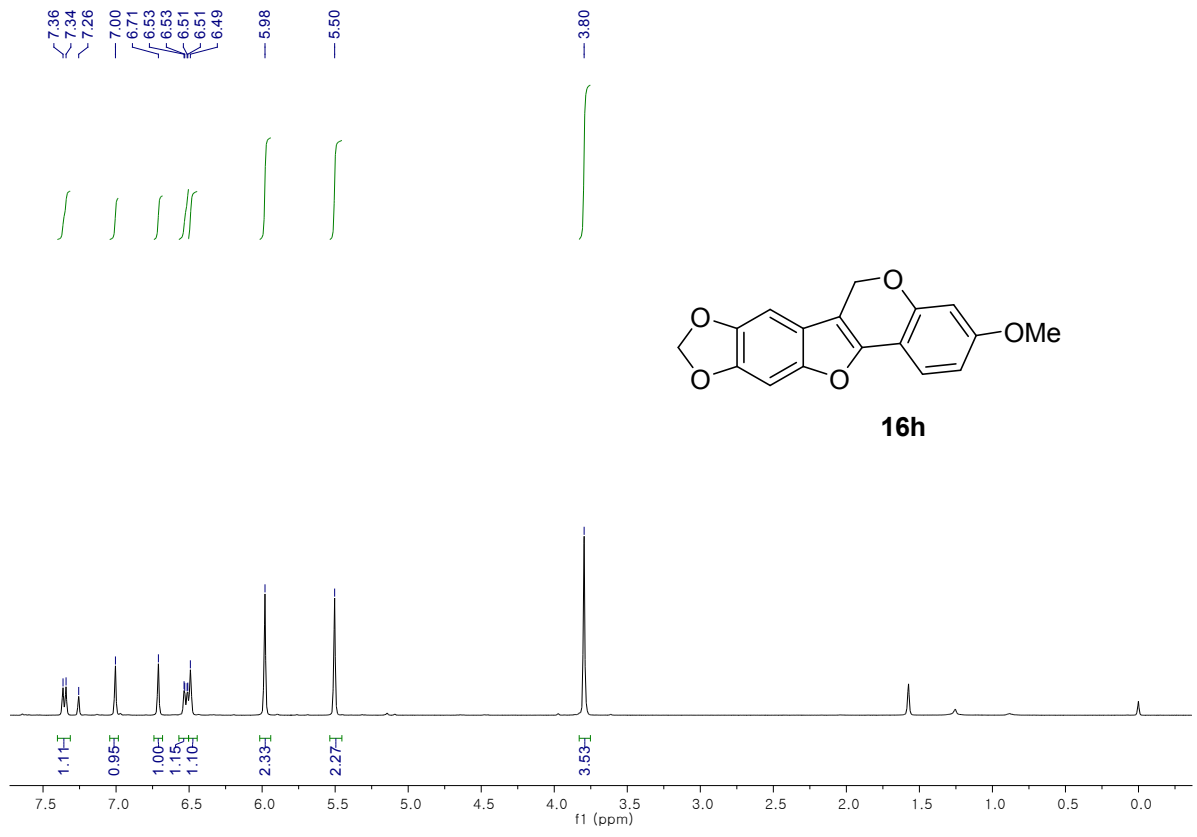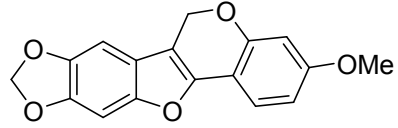

**16h**

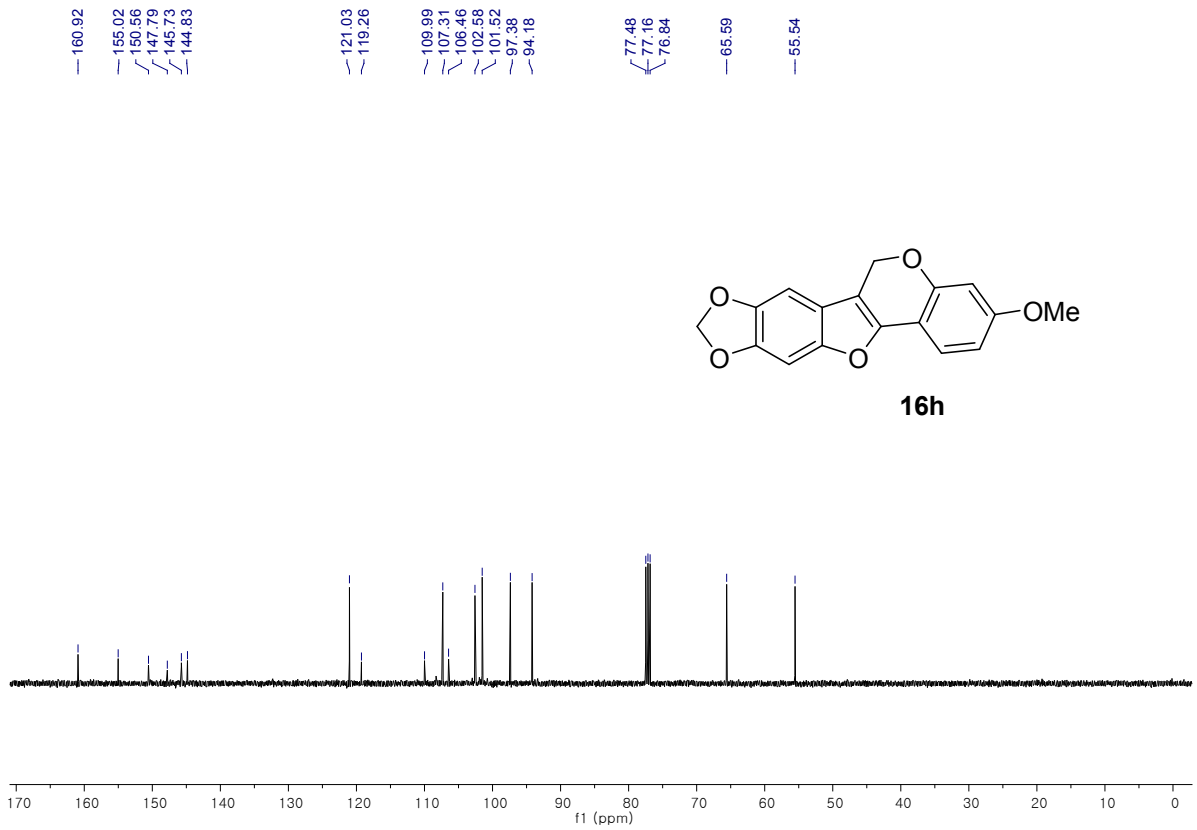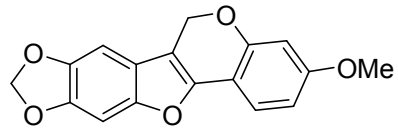

**16h**

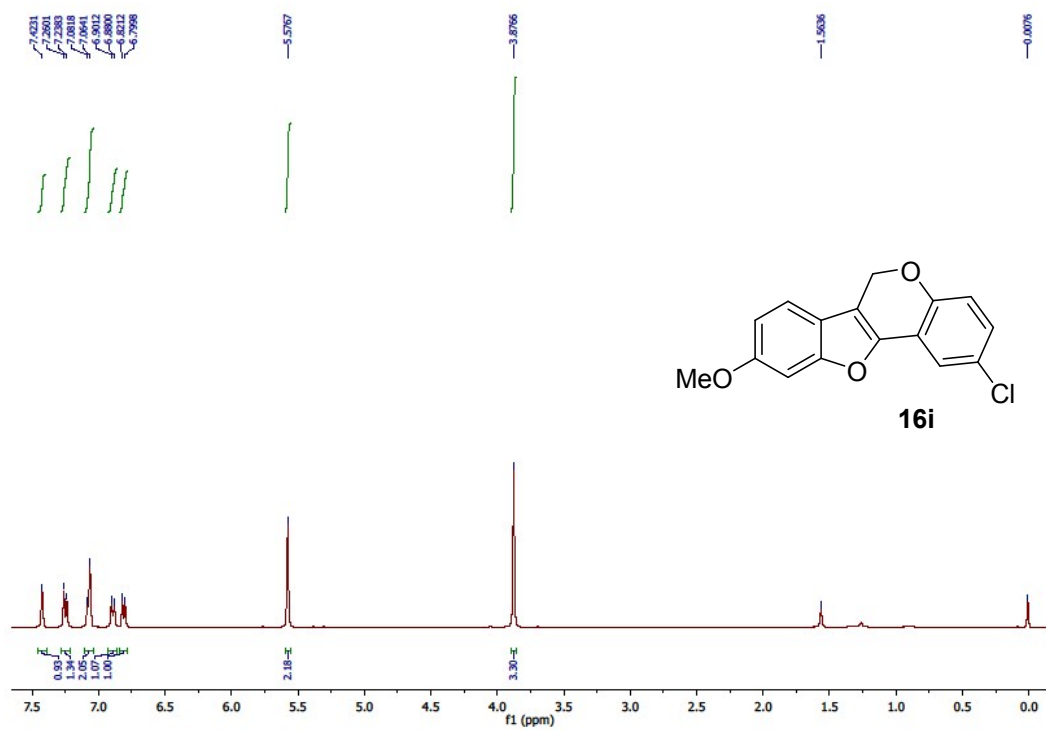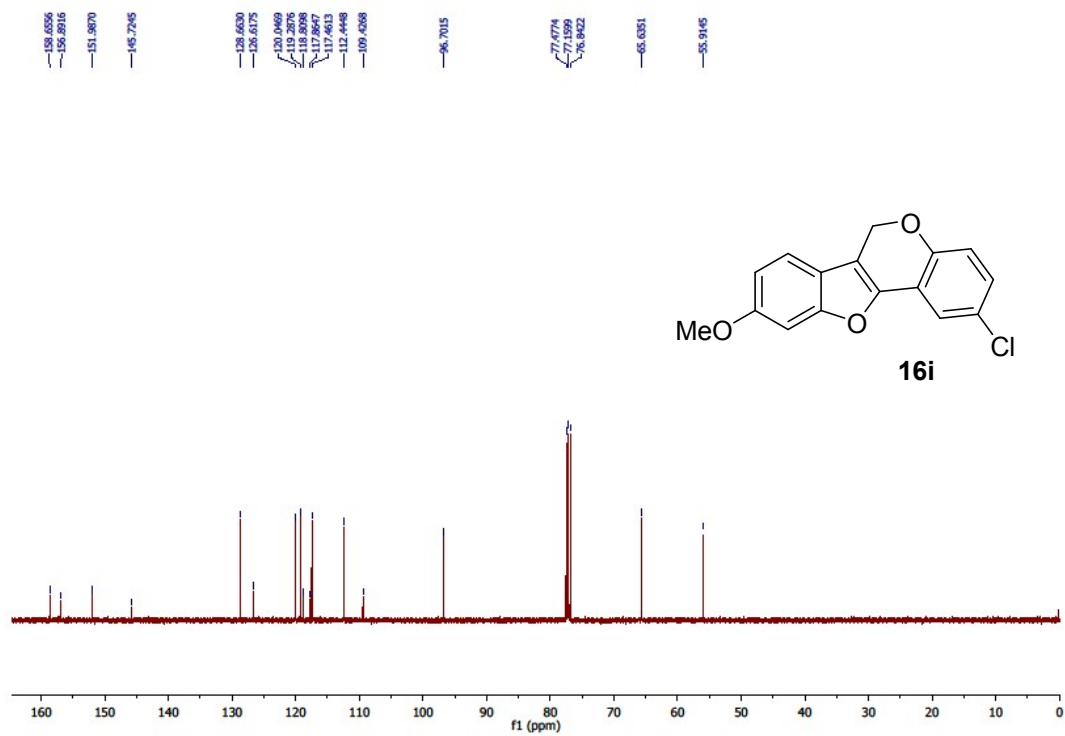

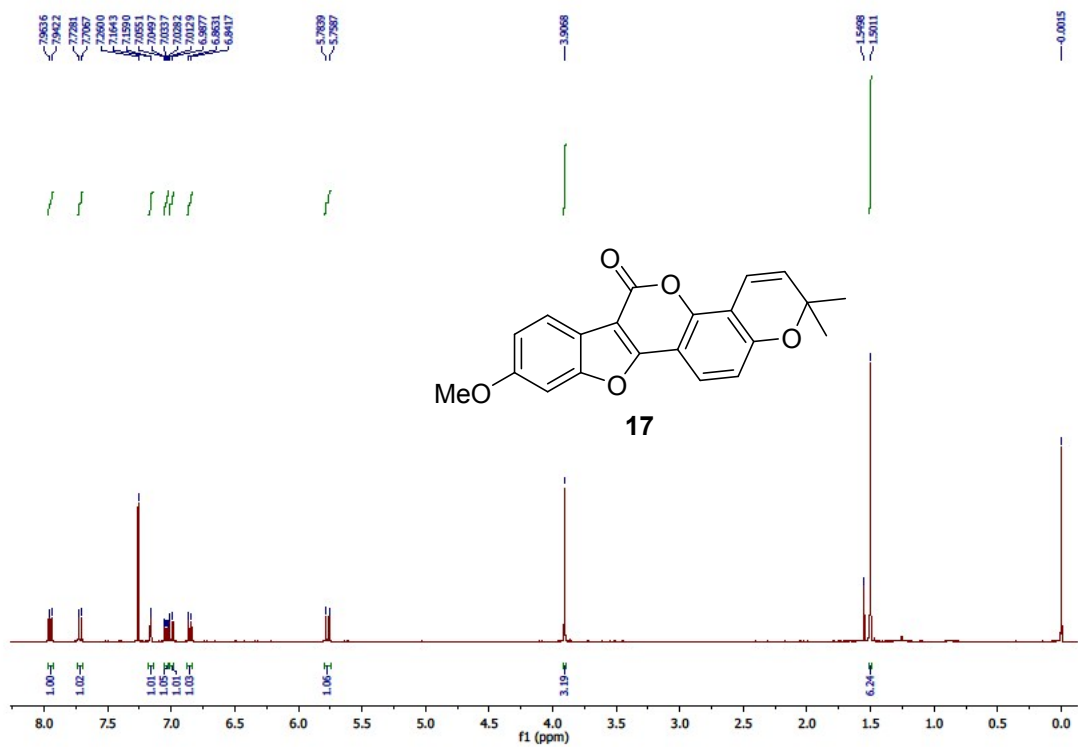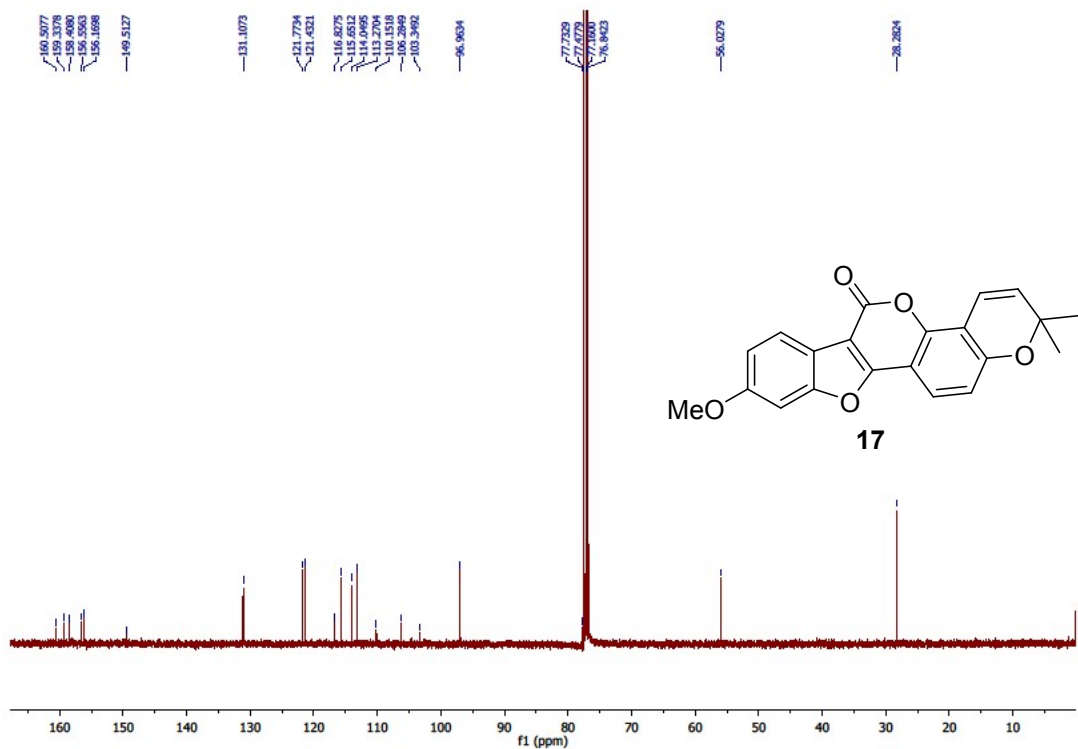

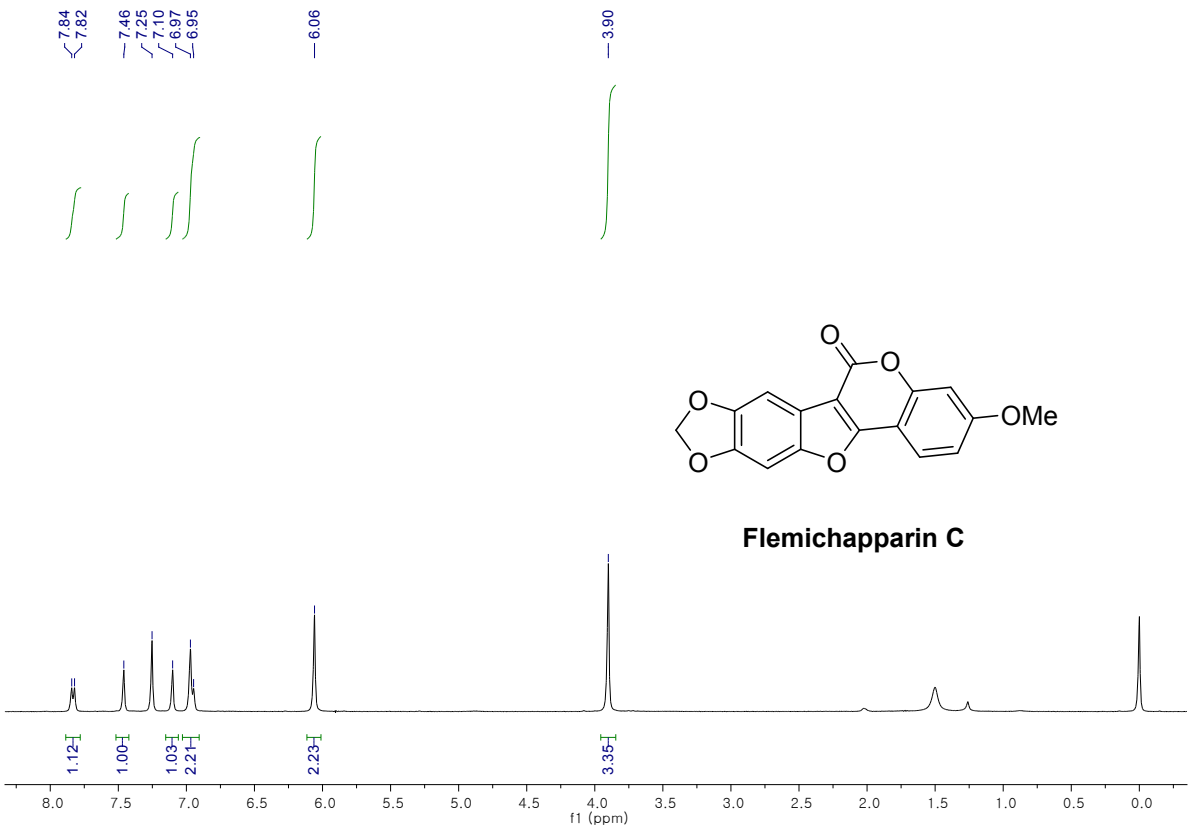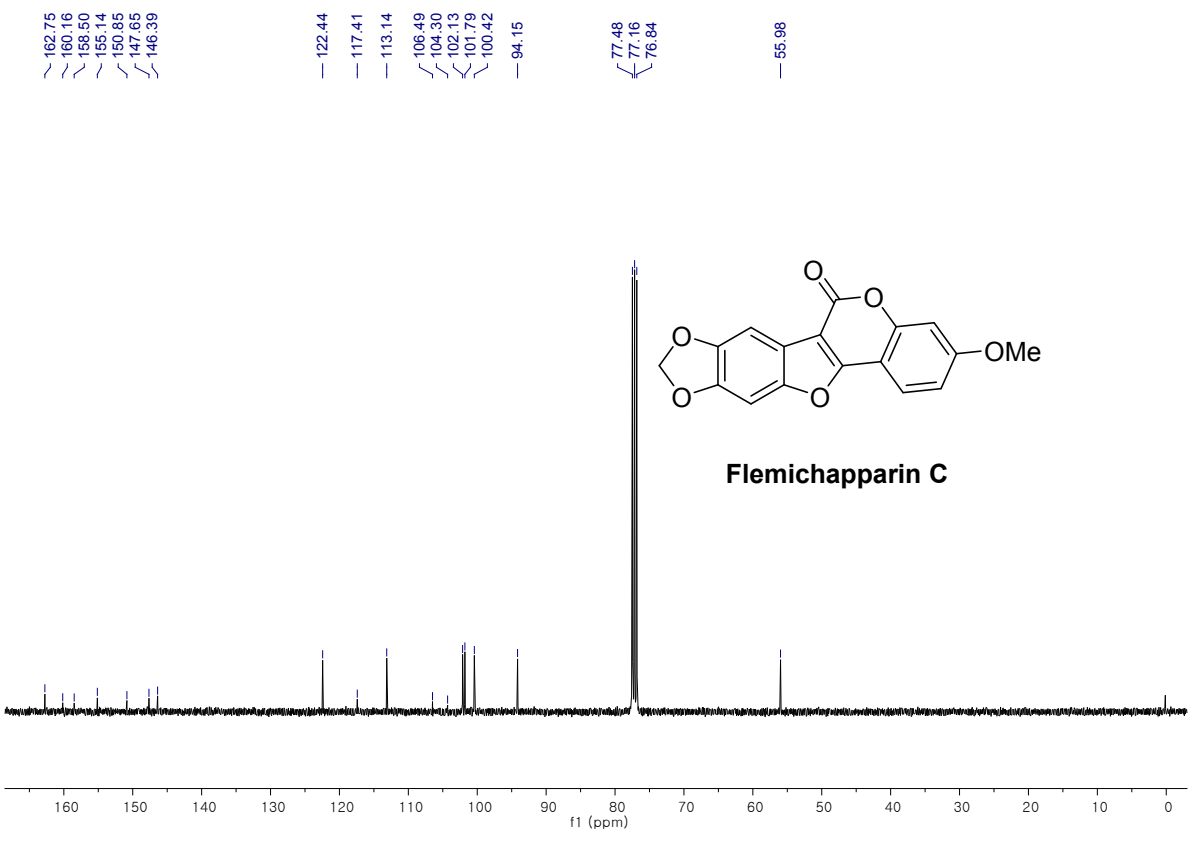

Supplement: c6ob01451h1.pdf [file c6ob01451h1.pdf]
